# Supplementary material for: Machine-learning-guided prediction of photovoltaic performance of non-fullerene organic solar cells using novel molecular and structural descriptors
Source: Royal Society of Chemistry journal article supplement (doi:10.1039/d3ta04603f), 2023-01-01
Supplement: d3ta04603f1.pdf [file d3ta04603f1.pdf]

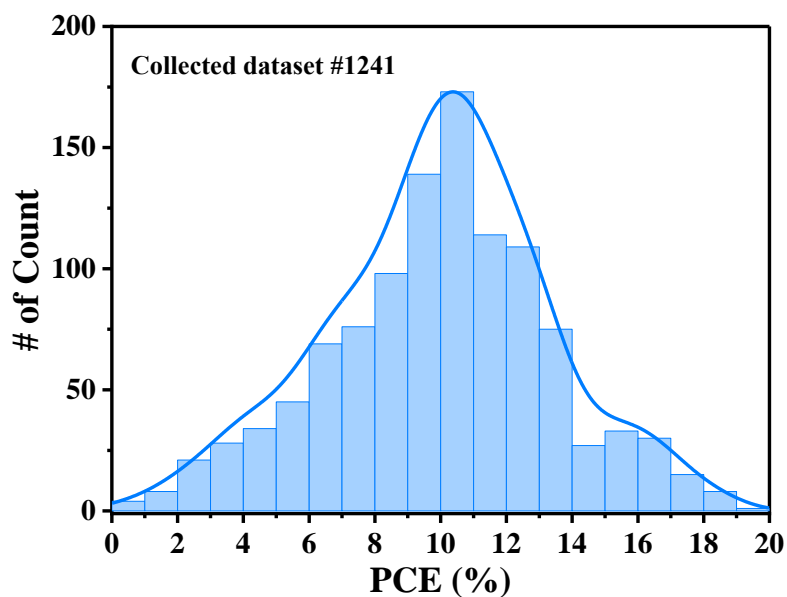

**Figure S2** Distribution and histogram of the collected experimental PCE in the datasets

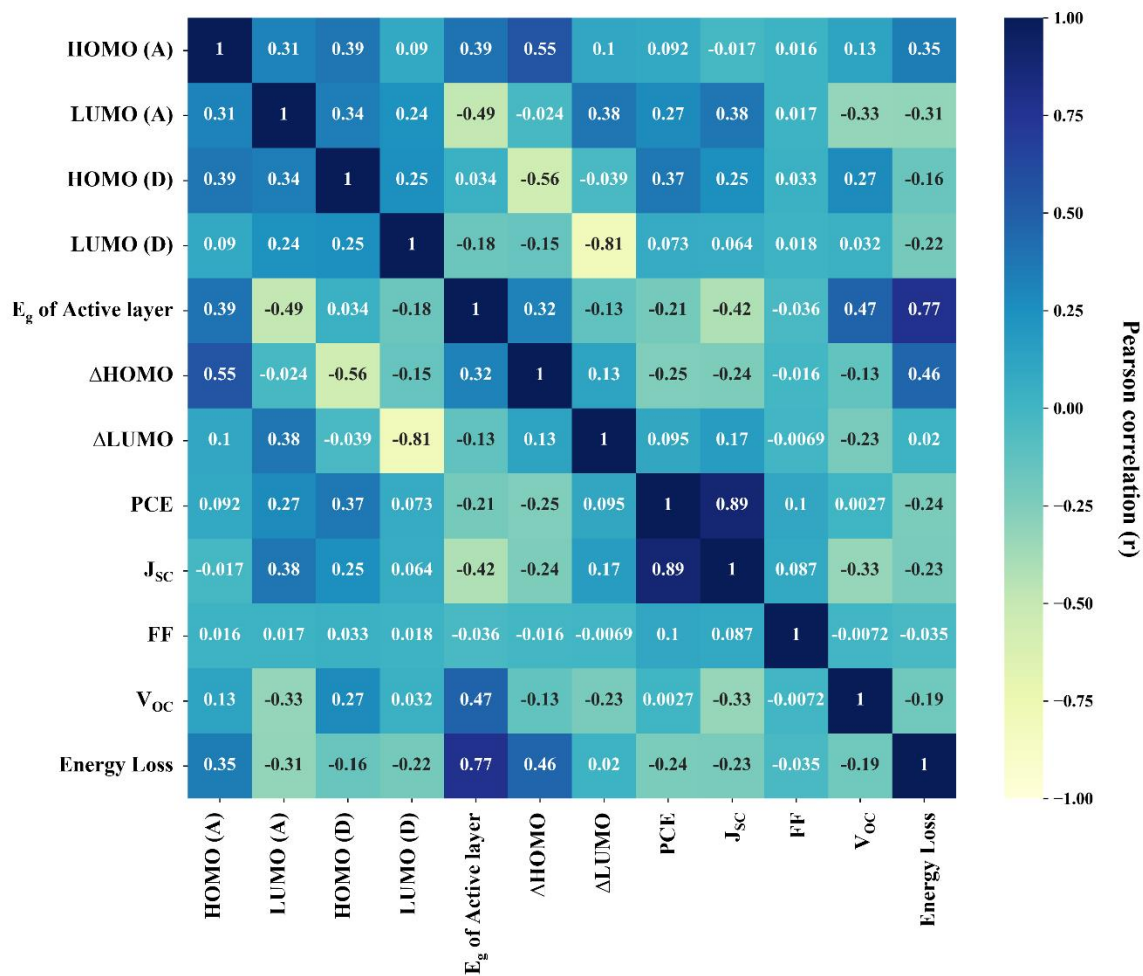

**Figure S3** Correlation heatmap between FMOs descriptors and photovoltaic parameters of the polymer:NFA OSCs.

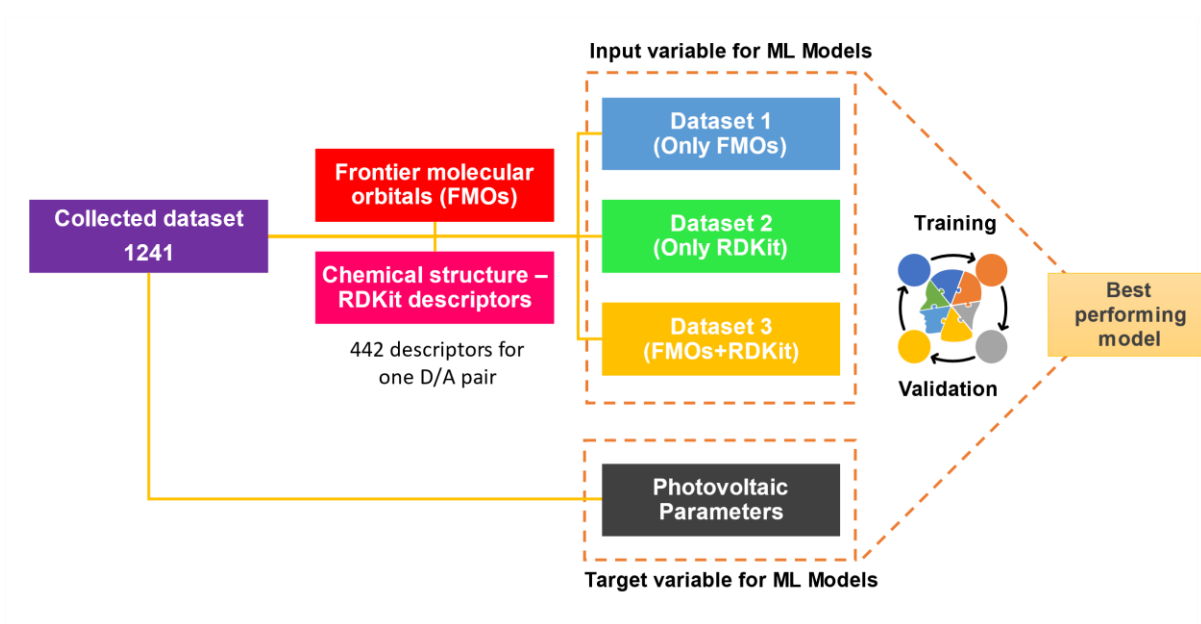

**Figure S4** Workflow the ML model training and data selection

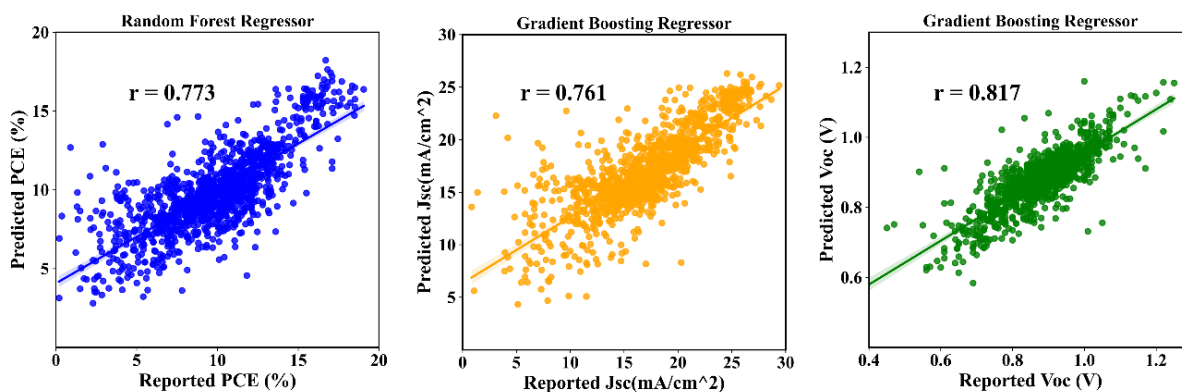

**Figure S5** Correlation plots of experimental and predicted value for best-performing ML model (a)  $PCE$ , (b)  $J_{SC}$ , and (c)  $V_{OC}$  for dataset-3, where predicted values were obtained by the leave-one-out-cross-validation technique.

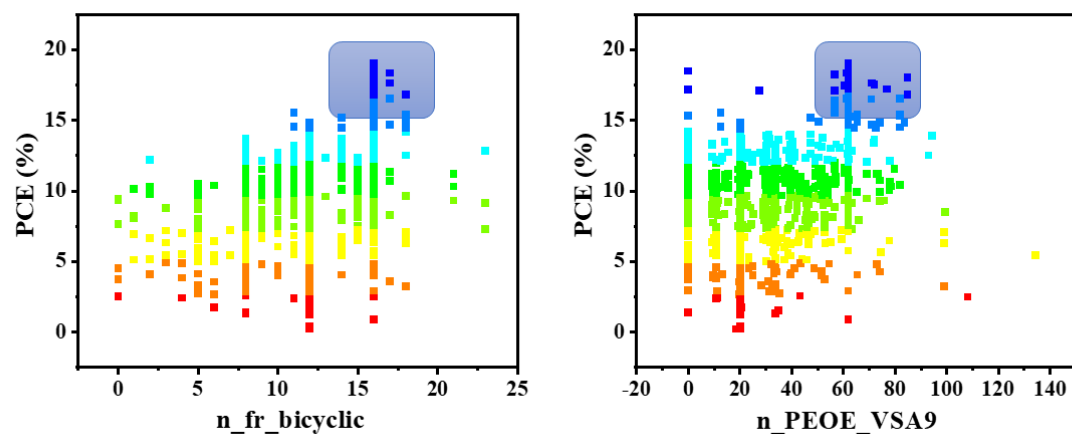

**Figure S6** The correlation plots of the  $PCE$  vs  $n\_fr\_bicyclic$  and  $p\_EState\_VSA5$ , respectively.

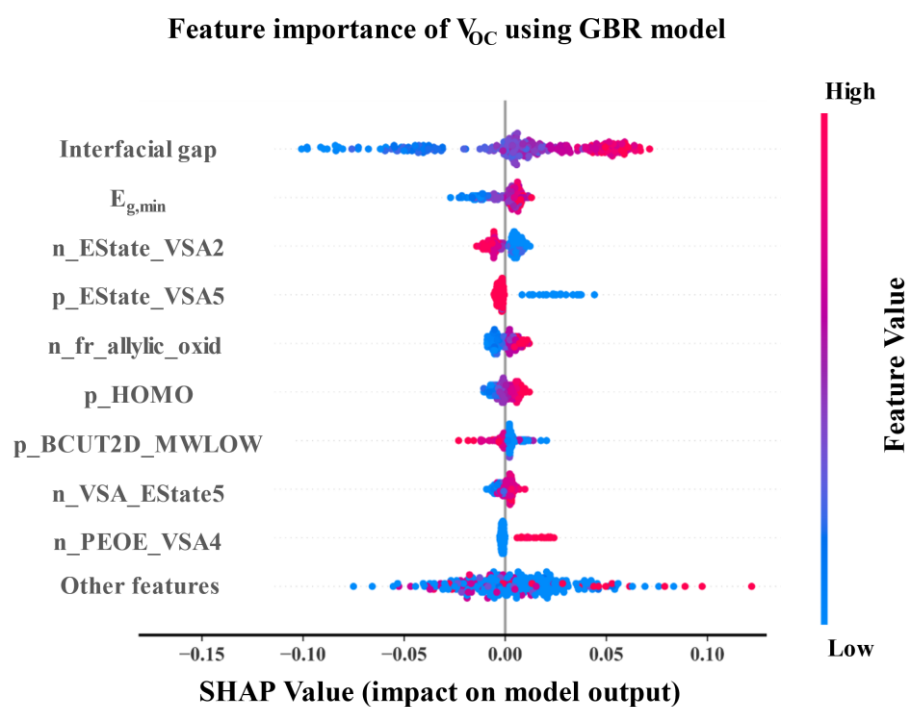

**Figure S7** The feature importance ranking of FMO and RDKit descriptors by SHAP value analyses for (a)  $V_{OC}$  using GBR ML model

**Table S1** The predication performance of ML models for different photovoltaic parameters using only FMOs descriptors (Dataset – 1).

| <b>Target variable</b> | <b>ML Models</b>            | <b>MAPE</b> | <b>RMSE</b> | <b>r</b> |
|------------------------|-----------------------------|-------------|-------------|----------|
| <i>PCE</i>             | Decision Tree Regressor     | 30.215      | 3.324       | 0.541    |
|                        | Gradient Boosting Regressor | 25.595      | 2.427       | 0.670    |
|                        | XGBoost Regressor           | 27.752      | 2.601       | 0.635    |
|                        | Random Forest Regressor     | 24.177      | 2.332       | 0.700    |
|                        | Artificial Neural Network   | 29.261      | 2.848       | 0.505    |
| <i>J<sub>sc</sub></i>  | Decision Tree Regressor     | 22.860      | 4.805       | 0.533    |
|                        | Gradient Boosting Regressor | 18.558      | 3.478       | 0.680    |
|                        | XGBoost Regressor           | 19.129      | 3.690       | 0.649    |
|                        | Random Forest Regressor     | 17.418      | 3.299       | 0.717    |
|                        | Artificial Neural Network   | 20.489      | 3.913       | 0.585    |
| <i>V<sub>oc</sub></i>  | Decision Tree Regressor     | 7.927       | 0.100       | 0.531    |
|                        | Gradient Boosting Regressor | 5.672       | 0.067       | 0.689    |
|                        | XGBoost Regressor           | 5.660       | 0.071       | 0.661    |
|                        | Random Forest Regressor     | 5.489       | 0.065       | 0.704    |
|                        | Artificial Neural Network   | 6.480       | 0.073       | 0.603    |

**Table S2** Performance evaluation parameters for different ML models using LOOCV using FMOs+RDKit descriptors (Dataset – 3)

| Target variable       | ML Models                   | MAPE   | RMSE  | r     |
|-----------------------|-----------------------------|--------|-------|-------|
| <i>PCE</i>            | Random Forest Regressor     | 17.170 | 2.112 | 0.773 |
|                       | Gradient Boosting Regressor | 18.098 | 2.200 | 0.751 |
|                       | XGBoost Regressor           | 22.167 | 2.292 | 0.737 |
|                       | Artificial Neural Network   | 22.923 | 2.555 | 0.695 |
| <i>J<sub>sc</sub></i> | Random Forest Regressor     | 16.564 | 2.992 | 0.792 |
|                       | Gradient Boosting Regressor | 14.203 | 2.570 | 0.842 |
|                       | XGBoost Regressor           | 16.202 | 3.157 | 0.761 |
|                       | Artificial Neural Network   | 14.574 | 2.832 | 0.804 |
| <i>V<sub>oc</sub></i> | Random Forest Regressor     | 4.468  | 0.058 | 0.813 |
|                       | Gradient Boosting Regressor | 4.662  | 0.057 | 0.817 |
|                       | XGBoost Regressor           | 4.427  | 0.058 | 0.814 |
|                       | Artificial Neural Network   | 4.684  | 0.069 | 0.802 |

**Table S3** Manually collected datasets from the literature for Polymer:NFA based OSCs

| Sr. No. | Donor      | Acceptor  | PCE (%) | J <sub>sc</sub> (mA/cm <sup>2</sup> ) | FF    | V <sub>oc</sub> (V) | DOI                                                                                           |
|---------|------------|-----------|---------|---------------------------------------|-------|---------------------|-----------------------------------------------------------------------------------------------|
| 1.      | PTB7-Th    | DICTF-C10 | 6.930   | 16.350                                | 0.500 | 0.865               | <a href="https://doi.org/10.1021/a-csaem.8b00012">https://doi.org/10.1021/a-csaem.8b00012</a> |
| 2.      | PTBFBz     | ITIC      | 8.330   | 15.280                                | 0.690 | 0.790               | <a href="https://doi.org/10.1021/a-csaem.8b00574">https://doi.org/10.1021/a-csaem.8b00574</a> |
| 3.      | PBDT-DFQX1 | O-IDTBR   | 8.670   | 14.000                                | 0.579 | 1.070               | <a href="https://doi.org/10.1021/a-csaem.8b00453">https://doi.org/10.1021/a-csaem.8b00453</a> |
| 4.      | PBCIT      | ITIC      | 8.460   | 13.950                                | 0.601 | 1.010               | <a href="https://doi.org/10.1021/a-csaem.8b00506">https://doi.org/10.1021/a-csaem.8b00506</a> |
| 5.      | PTB7-Th    | ITIC      | 6.910   | 14.760                                | 0.571 | 0.820               | <a href="https://doi.org/10.1021/a-csaem.8b00506">https://doi.org/10.1021/a-csaem.8b00506</a> |
| 6.      | PBDB-T     | ITDI      | 8.000   | 13.940                                | 0.598 | 0.940               | <a href="https://doi.org/10.1021/a-csami.7b05417">https://doi.org/10.1021/a-csami.7b05417</a> |
| 7.      | PBDB-T     | BDCPDT-IC | 9.330   | 16.560                                | 0.655 | 0.860               | <a href="https://doi.org/10.1021/a-csami.7b06650">https://doi.org/10.1021/a-csami.7b06650</a> |

|     |            |            |        |        |       |       |                                                                                                 |
|-----|------------|------------|--------|--------|-------|-------|-------------------------------------------------------------------------------------------------|
| 8.  | PBDTSi-TA  | ITIC       | 7.510  | 14.090 | 0.553 | 0.960 | <a href="https://doi.org/10.1021/a csami.7b092 53">https://doi.org/10.1021/a csami.7b092 53</a> |
| 9.  | PBDTSi-Q   | ITIC       | 4.380  | 9.470  | 0.509 | 0.910 | <a href="https://doi.org/10.1021/a csami.7b092 53">https://doi.org/10.1021/a csami.7b092 53</a> |
| 10. | PBDTTPD-HT | ITIC       | 10.200 | 15.400 | 0.680 | 0.970 | <a href="https://doi.org/10.1021/a csami.7b097 57">https://doi.org/10.1021/a csami.7b097 57</a> |
| 11. | PBDB-ST    | ITIC-SC6   | 7.170  | 13.870 | 0.580 | 0.900 | <a href="https://doi.org/10.1021/a csami.7b099 15">https://doi.org/10.1021/a csami.7b099 15</a> |
| 12. | PBDB-ST    | ITIC-SC8   | 7.490  | 14.430 | 0.600 | 0.900 | <a href="https://doi.org/10.1021/a csami.7b099 15">https://doi.org/10.1021/a csami.7b099 15</a> |
| 13. | PBDB-ST    | ITIC-SC2C6 | 8.940  | 15.320 | 0.640 | 0.920 | <a href="https://doi.org/10.1021/a csami.7b099 15">https://doi.org/10.1021/a csami.7b099 15</a> |
| 14. | PBODT      | ITIC       | 7.060  | 10.700 | 0.664 | 1.000 | <a href="https://doi.org/10.1021/a csami.7b100 59">https://doi.org/10.1021/a csami.7b100 59</a> |
| 15. | PBODT      | IDIC       | 8.190  | 13.300 | 0.668 | 0.920 | <a href="https://doi.org/10.1021/a csami.7b100 59">https://doi.org/10.1021/a csami.7b100 59</a> |
| 16. | PTTBTBO    | ITIC       | 1.570  | 3.940  | 0.460 | 0.870 | <a href="https://doi.org/10.1021/a csami.7b181 52">https://doi.org/10.1021/a csami.7b181 52</a> |
| 17. | PDTBTBO    | ITIC       | 5.410  | 10.420 | 0.590 | 0.880 | <a href="https://doi.org/10.1021/a csami.7b181 52">https://doi.org/10.1021/a csami.7b181 52</a> |
| 18. | P2FDTBTBO  | ITIC       | 2.460  | 7.040  | 0.380 | 0.920 | <a href="https://doi.org/10.1021/a csami.7b181 52">https://doi.org/10.1021/a csami.7b181 52</a> |
| 19. | P3HT       | Qx1        | 4.030  | 6.020  | 0.670 | 1.000 | <a href="https://doi.org/10.1021/a csami.8b002 16">https://doi.org/10.1021/a csami.8b002 16</a> |
| 20. | P3HT       | Qx1b       | 4.810  | 7.340  | 0.690 | 0.950 | <a href="https://doi.org/10.1021/a csami.8b002 16">https://doi.org/10.1021/a csami.8b002 16</a> |
| 21. | PTB7-Th    | IDT-FBTR   | 9.140  | 15.180 | 0.576 | 1.020 | <a href="https://doi.org/10.1021/acsami.8b04541">https://doi.org/10.1021/acsami.8b04541</a>     |
| 22. | PTzBI-S    | ITIC       | 9.120  | 16.620 | 0.600 | 0.915 | <a href="https://doi.org/10.1021/a csami.8b057 00">https://doi.org/10.1021/a csami.8b057 00</a> |
| 23. | PTzBI-Ph   | ITIC       | 10.190 | 16.390 | 0.677 | 0.918 | <a href="https://doi.org/10.1021/a csami.8b057 00">https://doi.org/10.1021/a csami.8b057 00</a> |

|     |             |            |        |        |       |       |                                                                                                             |
|-----|-------------|------------|--------|--------|-------|-------|-------------------------------------------------------------------------------------------------------------|
| 24. | P1          | IDIC       | 4.860  | 8.530  | 0.662 | 0.860 | <a href="https://doi.org/10.1021/a csami.8b044 32">https://doi.org/10.1021/a csami.8b044 32</a>             |
| 25. | P2          | IDIC       | 7.750  | 13.150 | 0.648 | 0.910 | <a href="https://doi.org/10.1021/a csami.8b044 32">https://doi.org/10.1021/a csami.8b044 32</a>             |
| 26. | P3          | IDIC       | 9.700  | 15.990 | 0.609 | 1.000 | <a href="https://doi.org/10.1021/a csami.8b044 32">https://doi.org/10.1021/a csami.8b044 32</a>             |
| 27. | P4          | IDIC       | 2.930  | 4.820  | 0.574 | 1.060 | <a href="https://doi.org/10.1021/a csami.8b044 32">https://doi.org/10.1021/a csami.8b044 32</a>             |
| 28. | PPDT2FBT    | IDT2BR     | 5.160  | 8.400  | 0.550 | 1.100 | <a href="https://doi.org/10.1021/acsami.8b06445">https://doi.org/10.1021/acsami.8b06445</a>                 |
| 29. | PffBT4T-2DT | EH-IDTBR   | 11.100 | 17.200 | 0.630 | 1.020 | <a href="https://doi.org/10.1021/a csenergylett.7b00390">https://doi.org/10.1021/a csenergylett.7b00390</a> |
| 30. | PTB7-Th     | ITIC       | 6.620  | 14.340 | 0.580 | 0.800 | <a href="https://doi.org/10.1021/a csenergylett.7b00551">https://doi.org/10.1021/a csenergylett.7b00551</a> |
| 31. | PBTC1       | ITIC       | 7.570  | 14.530 | 0.580 | 0.910 | <a href="https://doi.org/10.1021/a csenergylett.7b00551">https://doi.org/10.1021/a csenergylett.7b00551</a> |
| 32. | J71         | IT-M       | 10.680 | 17.710 | 0.615 | 0.981 | <a href="https://doi.org/10.1021/a csenergylett.8b00100">https://doi.org/10.1021/a csenergylett.8b00100</a> |
| 33. | J71         | ITIC       | 10.650 | 16.260 | 0.682 | 0.929 | <a href="https://doi.org/10.1021/a csenergylett.8b00100">https://doi.org/10.1021/a csenergylett.8b00100</a> |
| 34. | PTB7-Th     | IEICO-4F   | 12.800 | 27.300 | 0.657 | 0.712 | <a href="https://doi.org/10.1021/a csenergylett.7b01266">https://doi.org/10.1021/a csenergylett.7b01266</a> |
| 35. | PTB7-Th     | ITIC       | 7.800  | 14.400 | 0.660 | 0.825 | <a href="https://doi.org/10.1021/a csenergylett.8b00366">https://doi.org/10.1021/a csenergylett.8b00366</a> |
| 36. | PTB7-Th     | IDTT-T     | 9.100  | 15.700 | 0.570 | 1.015 | <a href="https://doi.org/10.1021/a csenergylett.8b00366">https://doi.org/10.1021/a csenergylett.8b00366</a> |
| 37. | J52         | IEICO-4F   | 8.200  | 20.480 | 0.569 | 0.704 | <a href="https://doi.org/10.1021/a csenergylett.8b00627">https://doi.org/10.1021/a csenergylett.8b00627</a> |
| 38. | J52         | i-IEICO-4F | 13.180 | 22.860 | 0.679 | 0.849 | <a href="https://doi.org/10.1021/a csenergylett.8b00627">https://doi.org/10.1021/a csenergylett.8b00627</a> |
| 39. | PBDB-T      | BDCPDT-TTC | 10.290 | 17.720 | 0.618 | 0.940 | <a href="https://doi.org/10.1021/a csenergylett.8b00563">https://doi.org/10.1021/a csenergylett.8b00563</a> |



|     |         |                |        |        |       |       |                                                                                                               |
|-----|---------|----------------|--------|--------|-------|-------|---------------------------------------------------------------------------------------------------------------|
| 40. | PBDB-T  | BDCPDT-<br>IC  | 9.330  | 16.560 | 0.655 | 0.860 | <a href="https://doi.org/10.1021/a csenergylett. 8b00563">https://doi.org/10.1021/a csenergylett. 8b00563</a> |
| 41. | PBDB-T  | BDCPDT-<br>FIC | 8.120  | 19.120 | 0.607 | 0.700 | <a href="https://doi.org/10.1021/a csenergylett. 8b00563">https://doi.org/10.1021/a csenergylett. 8b00563</a> |
| 42. | PBDB-T  | IDT6CN-M       | 11.230 | 15.970 | 0.761 | 0.924 | <a href="https://doi.org/10.1021/a csenergylett. 8b00825">https://doi.org/10.1021/a csenergylett. 8b00825</a> |
| 43. | PBDB-T  | IDT8CN-M       | 12.430 | 17.110 | 0.789 | 0.920 | <a href="https://doi.org/10.1021/a csenergylett. 8b00825">https://doi.org/10.1021/a csenergylett. 8b00825</a> |
| 44. | PBDB-T  | IDTT2F         | 8.850  | 18.510 | 0.590 | 0.810 | <a href="https://doi.org/10.1021/a csenergylett. 8b00928">https://doi.org/10.1021/a csenergylett. 8b00928</a> |
| 45. | PBDB-T  | IDTOT2F        | 12.790 | 20.870 | 0.720 | 0.850 | <a href="https://doi.org/10.1021/a csenergylett. 8b00928">https://doi.org/10.1021/a csenergylett. 8b00928</a> |
| 46. | P3HT    | BTA1           | 5.240  | 7.340  | 0.700 | 1.020 | <a href="https://doi.org/10.1021/a csmacrolett. 7b00097">https://doi.org/10.1021/a csmacrolett. 7b00097</a>   |
| 47. | P3HT    | BTA2           | 4.500  | 6.150  | 0.600 | 1.220 | <a href="https://doi.org/10.1021/a csmacrolett. 7b00097">https://doi.org/10.1021/a csmacrolett. 7b00097</a>   |
| 48. | PTB7-Th | pO-ITIC        | 7.510  | 14.790 | 0.591 | 0.800 | <a href="https://doi.org/10.1021/a cssuscheme ng.7b03606">https://doi.org/10.1021/a cssuscheme ng.7b03606</a> |
| 49. | PTB7-Th | mO-ITIC        | 7.330  | 14.190 | 0.601 | 0.800 | <a href="https://doi.org/10.1021/a cssuscheme ng.7b03606">https://doi.org/10.1021/a cssuscheme ng.7b03606</a> |
| 50. | PTB7-Th | FpO-ITIC       | 6.170  | 12.990 | 0.567 | 0.780 | <a href="https://doi.org/10.1021/a cssuscheme ng.7b03606">https://doi.org/10.1021/a cssuscheme ng.7b03606</a> |
| 51. | PTB7-Th | ITIC           | 7.310  | 13.820 | 0.616 | 0.800 | <a href="https://doi.org/10.1021/a cssuscheme ng.7b03606">https://doi.org/10.1021/a cssuscheme ng.7b03606</a> |
| 52. | PTZ-DO  | pO-ITIC        | 9.030  | 14.560 | 0.674 | 0.920 | <a href="https://doi.org/10.1021/a cssuscheme ng.7b03606">https://doi.org/10.1021/a cssuscheme ng.7b03606</a> |
| 53. | PTZ-DO  | mO-ITIC        | 9.280  | 15.180 | 0.664 | 0.920 | <a href="https://doi.org/10.1021/a cssuscheme ng.7b03606">https://doi.org/10.1021/a cssuscheme ng.7b03606</a> |
| 54. | PTZ-DO  | FpO-ITIC       | 6.690  | 12.550 | 0.606 | 0.880 | <a href="https://doi.org/10.1021/a cssuscheme ng.7b03606">https://doi.org/10.1021/a cssuscheme ng.7b03606</a> |
| 55. | PTZ-DO  | ITIC           | 8.050  | 14.300 | 0.612 | 0.920 | <a href="https://doi.org/10.1021/a cssuscheme ng.7b03606">https://doi.org/10.1021/a cssuscheme ng.7b03606</a> |

|     |              |         |        |        |       |       |                                                                                             |
|-----|--------------|---------|--------|--------|-------|-------|---------------------------------------------------------------------------------------------|
| 56. | P3HT         | NIDCS   | 2.510  | 8.040  | 0.460 | 0.730 | <a href="https://doi.org/10.1002/aenm.201400929">https://doi.org/10.1002/aenm.201400929</a> |
| 57. | PBDB-T       | IT-DM   | 11.250 | 16.290 | 0.688 | 0.960 | <a href="https://doi.org/10.1002/aenm.201602000">https://doi.org/10.1002/aenm.201602000</a> |
| 58. | PBDB-T       | IT-M    | 12.050 | 17.310 | 0.707 | 0.940 | <a href="https://doi.org/10.1002/aenm.201602000">https://doi.org/10.1002/aenm.201602000</a> |
| 59. | PffBT-T3     | ITIC-Th | 7.900  | 14.250 | 0.608 | 0.880 | <a href="https://doi.org/10.1002/aenm.201602119">https://doi.org/10.1002/aenm.201602119</a> |
| 60. | PffBTBX-T3   | ITIC-Th | 9.000  | 15.290 | 0.598 | 0.960 | <a href="https://doi.org/10.1002/aenm.201602119">https://doi.org/10.1002/aenm.201602119</a> |
| 61. | PffBX-T3     | ITIC-Th | 7.400  | 11.720 | 0.569 | 1.070 | <a href="https://doi.org/10.1002/aenm.201602119">https://doi.org/10.1002/aenm.201602119</a> |
| 62. | PDTP4TFBT    | ITIC    | 7.800  | 14.260 | 0.593 | 0.900 | <a href="https://doi.org/10.1002/aenm.201602509">https://doi.org/10.1002/aenm.201602509</a> |
| 63. | PBDB-T       | IT-OM-1 | 6.300  | 12.310 | 0.510 | 1.010 | <a href="https://doi.org/10.1002/aenm.201700183">https://doi.org/10.1002/aenm.201700183</a> |
| 64. | PBDB-T       | IT-OM-2 | 11.900 | 17.530 | 0.730 | 0.930 | <a href="https://doi.org/10.1002/aenm.201700183">https://doi.org/10.1002/aenm.201700183</a> |
| 65. | PBDB-T       | IT-OM-3 | 10.800 | 16.380 | 0.680 | 0.970 | <a href="https://doi.org/10.1002/aenm.201700183">https://doi.org/10.1002/aenm.201700183</a> |
| 66. | PBDB-T       | IT-OM-4 | 7.900  | 14.690 | 0.560 | 0.960 | <a href="https://doi.org/10.1002/aenm.201700183">https://doi.org/10.1002/aenm.201700183</a> |
| 67. | J81          | ITIC    | 10.600 | 15.270 | 0.731 | 0.950 | <a href="https://doi.org/10.1002/aenm.201700746">https://doi.org/10.1002/aenm.201700746</a> |
| 68. | J81          | m-ITIC  | 11.050 | 16.480 | 0.698 | 0.960 | <a href="https://doi.org/10.1002/aenm.201700746">https://doi.org/10.1002/aenm.201700746</a> |
| 69. | P3HT         | IDTBR   | 6.050  | 12.550 | 0.670 | 0.720 | <a href="https://doi.org/10.1002/aenm.201700770">https://doi.org/10.1002/aenm.201700770</a> |
| 70. | PBDT[2F]T    | ITIC    | 5.600  | 11.600 | 0.530 | 0.940 | <a href="https://doi.org/10.1002/aenm.201700834">https://doi.org/10.1002/aenm.201700834</a> |
| 71. | PBDT(T)[2F]T | ITIC    | 9.100  | 16.900 | 0.620 | 0.940 | <a href="https://doi.org/10.1002/aenm.201700834">https://doi.org/10.1002/aenm.201700834</a> |

|     |             |           |        |        |       |       |                                                                                             |
|-----|-------------|-----------|--------|--------|-------|-------|---------------------------------------------------------------------------------------------|
| 72. | PTPTI-T100  | m-ITIC    | 9.100  | 13.900 | 0.683 | 0.960 | <a href="https://doi.org/10.1002/aenm.201701125">https://doi.org/10.1002/aenm.201701125</a> |
| 73. | PffBT4T-2DT | ITIC-Th   | 6.600  | 13.320 | 0.569 | 0.850 | <a href="https://doi.org/10.1002/aenm.201701674">https://doi.org/10.1002/aenm.201701674</a> |
| 74. | PffBT-T3    | ITIC-Th   | 8.000  | 14.250 | 0.608 | 0.880 | <a href="https://doi.org/10.1002/aenm.201701674">https://doi.org/10.1002/aenm.201701674</a> |
| 75. | PTFB-P      | ITIC-Th   | 9.200  | 15.350 | 0.642 | 0.920 | <a href="https://doi.org/10.1002/aenm.201701674">https://doi.org/10.1002/aenm.201701674</a> |
| 76. | PTFB-O      | ITIC-Th   | 10.900 | 16.700 | 0.676 | 0.920 | <a href="https://doi.org/10.1002/aenm.201701674">https://doi.org/10.1002/aenm.201701674</a> |
| 77. | PTB7-Th     | ITIC-Th   | 8.500  | 16.070 | 0.672 | 0.800 | <a href="https://doi.org/10.1002/aenm.201701674">https://doi.org/10.1002/aenm.201701674</a> |
| 78. | PTB7-Th     | 6TIC      | 11.070 | 20.110 | 0.662 | 0.831 | <a href="https://doi.org/10.1002/aenm.201702831">https://doi.org/10.1002/aenm.201702831</a> |
| 79. | PBDB-T      | F-H       | 9.590  | 15.020 | 0.670 | 0.940 | <a href="https://doi.org/10.1002/aenm.201702870">https://doi.org/10.1002/aenm.201702870</a> |
| 80. | PBDB-T      | F-F       | 10.850 | 17.360 | 0.710 | 0.880 | <a href="https://doi.org/10.1002/aenm.201702870">https://doi.org/10.1002/aenm.201702870</a> |
| 81. | PBDB-T      | F-Cl      | 11.470 | 17.610 | 0.750 | 0.870 | <a href="https://doi.org/10.1002/aenm.201702870">https://doi.org/10.1002/aenm.201702870</a> |
| 82. | PBDB-T      | F-Br      | 12.050 | 18.220 | 0.760 | 0.870 | <a href="https://doi.org/10.1002/aenm.201702870">https://doi.org/10.1002/aenm.201702870</a> |
| 83. | PTQ10       | m-ITIC-2F | 12.530 | 18.980 | 0.691 | 0.955 | <a href="https://doi.org/10.1002/aenm.201800815">https://doi.org/10.1002/aenm.201800815</a> |
| 84. | PTQ10       | m-ITIC-4F | 12.530 | 19.760 | 0.703 | 0.902 | <a href="https://doi.org/10.1002/aenm.201800815">https://doi.org/10.1002/aenm.201800815</a> |
| 85. | PTB7-Th     | SiOTIC-4F | 9.000  | 21.600 | 0.614 | 0.650 | <a href="https://doi.org/10.1002/aenm.201801212">https://doi.org/10.1002/aenm.201801212</a> |
| 86. | PTB7-Th     | COTIC-4F  | 7.400  | 20.300 | 0.563 | 0.560 | <a href="https://doi.org/10.1002/aenm.201801212">https://doi.org/10.1002/aenm.201801212</a> |
| 87. | PBDT-TT     | ITIC      | 9.670  | 17.200 | 0.680 | 0.827 | <a href="https://doi.org/10.1002/aenm.201801214">https://doi.org/10.1002/aenm.201801214</a> |

|      |             |           |        |        |       |       |                                                                                             |
|------|-------------|-----------|--------|--------|-------|-------|---------------------------------------------------------------------------------------------|
| 88.  | PBDT-TT     | IT-M      | 11.380 | 17.900 | 0.710 | 0.895 | <a href="https://doi.org/10.1002/aenm.201801214">https://doi.org/10.1002/aenm.201801214</a> |
| 89.  | PBDT-TT     | 6TIC      | 11.030 | 21.400 | 0.640 | 0.805 | <a href="https://doi.org/10.1002/aenm.201801214">https://doi.org/10.1002/aenm.201801214</a> |
| 90.  | PBDB-T      | IXIC      | 11.300 | 20.900 | 0.654 | 0.820 | <a href="https://doi.org/10.1002/aenm.201801203">https://doi.org/10.1002/aenm.201801203</a> |
| 91.  | PBDB-T      | IXIC-2Cl  | 12.200 | 23.600 | 0.709 | 0.730 | <a href="https://doi.org/10.1002/aenm.201801203">https://doi.org/10.1002/aenm.201801203</a> |
| 92.  | PBDB-T      | IXIC-4Cl  | 11.200 | 22.900 | 0.712 | 0.690 | <a href="https://doi.org/10.1002/aenm.201801203">https://doi.org/10.1002/aenm.201801203</a> |
| 93.  | PTB7-Th     | ITIC-2F   | 8.700  | 16.200 | 0.700 | 0.748 | <a href="https://doi.org/10.1002/aenm.201801209">https://doi.org/10.1002/aenm.201801209</a> |
| 94.  | PTB7-Th     | IOTIC-2F  | 12.100 | 21.900 | 0.650 | 0.817 | <a href="https://doi.org/10.1002/aenm.201801209">https://doi.org/10.1002/aenm.201801209</a> |
| 95.  | PTB7-Th     | ITOTIC-2F | 3.700  | 7.000  | 0.610 | 0.785 | <a href="https://doi.org/10.1002/aenm.201801209">https://doi.org/10.1002/aenm.201801209</a> |
| 96.  | PBDB-T      | IDTO-T-4  | 12.620 | 20.120 | 0.727 | 0.864 | <a href="https://doi.org/10.1002/aenm.201801618">https://doi.org/10.1002/aenm.201801618</a> |
| 97.  | PBDB-T      | IDTO-Se-4 | 10.670 | 18.550 | 0.692 | 0.831 | <a href="https://doi.org/10.1002/aenm.201801618">https://doi.org/10.1002/aenm.201801618</a> |
| 98.  | PBDB-T      | IDTO-TT-4 | 10.210 | 17.210 | 0.694 | 0.856 | <a href="https://doi.org/10.1002/aenm.201801618">https://doi.org/10.1002/aenm.201801618</a> |
| 99.  | PBDT-NQx    | ITIC      | 9.110  | 16.100 | 0.646 | 0.870 | <a href="https://doi.org/10.1002/afm.201701491">https://doi.org/10.1002/afm.201701491</a>   |
| 100. | PBDTS-NQx   | ITIC      | 11.470 | 17.860 | 0.698 | 0.920 | <a href="https://doi.org/10.1002/afm.201701491">https://doi.org/10.1002/afm.201701491</a>   |
| 101. | PffBT4T-2OD | FBR       | 7.040  | 12.620 | 0.500 | 1.110 | <a href="https://doi.org/10.1002/afm.201704389">https://doi.org/10.1002/afm.201704389</a>   |
| 102. | J61         | BTA3      | 8.250  | 10.840 | 0.662 | 1.150 | <a href="https://doi.org/10.1002/afm.201704507">https://doi.org/10.1002/afm.201704507</a>   |
| 103. | PBDB-T      | ITC6-IC   | 11.610 | 16.410 | 0.730 | 0.970 | <a href="https://doi.org/10.1002/afm.201705095">https://doi.org/10.1002/afm.201705095</a>   |

|      |                |              |        |        |       |       |                                                                                             |
|------|----------------|--------------|--------|--------|-------|-------|---------------------------------------------------------------------------------------------|
| 104. | PBDB-T         | ITIC         | 10.210 | 16.270 | 0.690 | 0.910 | <a href="https://doi.org/10.1002/afm.201705095">https://doi.org/10.1002/afm.201705095</a>   |
| 105. | PBDB-T         | ITIC         | 10.540 | 16.550 | 0.707 | 0.896 | <a href="https://doi.org/10.1002/afm.201705659">https://doi.org/10.1002/afm.201705659</a>   |
| 106. | PBDB-T         | IT-M         | 11.520 | 16.370 | 0.741 | 0.950 | <a href="https://doi.org/10.1002/afm.201705659">https://doi.org/10.1002/afm.201705659</a>   |
| 107. | PBDB-T         | Ph-DTDP-IC   | 7.730  | 14.580 | 0.679 | 0.780 | <a href="https://doi.org/10.1002/afm.201705927">https://doi.org/10.1002/afm.201705927</a>   |
| 108. | PBDB-T         | Ph-DTDP-TIC  | 9.210  | 17.310 | 0.596 | 0.890 | <a href="https://doi.org/10.1002/afm.201705927">https://doi.org/10.1002/afm.201705927</a>   |
| 109. | PBDB-T         | Ph-DTDP-TTIC | 4.020  | 10.580 | 0.421 | 0.900 | <a href="https://doi.org/10.1002/afm.201705927">https://doi.org/10.1002/afm.201705927</a>   |
| 110. | PBDT-FBT       | ITIC         | 7.150  | 13.510 | 0.613 | 0.800 | <a href="https://doi.org/10.1002/afm.201706404">https://doi.org/10.1002/afm.201706404</a>   |
| 111. | PBDTS-FBT      | ITIC         | 8.580  | 14.440 | 0.638 | 0.870 | <a href="https://doi.org/10.1002/afm.201706404">https://doi.org/10.1002/afm.201706404</a>   |
| 112. | PBDTF-BT       | ITIC         | 9.170  | 15.220 | 0.645 | 0.890 | <a href="https://doi.org/10.1002/afm.201706404">https://doi.org/10.1002/afm.201706404</a>   |
| 113. | PBDTSF-FBT     | ITIC         | 11.660 | 16.880 | 0.652 | 1.010 | <a href="https://doi.org/10.1002/afm.201706404">https://doi.org/10.1002/afm.201706404</a>   |
| 114. | PBDT-2TC       | ITIC         | 9.350  | 15.300 | 0.657 | 0.930 | <a href="https://doi.org/10.1002/afm.201706517">https://doi.org/10.1002/afm.201706517</a>   |
| 115. | PBDT-S-2TC     | ITIC         | 10.120 | 16.400 | 0.643 | 0.960 | <a href="https://doi.org/10.1002/afm.201706517">https://doi.org/10.1002/afm.201706517</a>   |
| 116. | PTB7-Th        | Para-TrBRCN  | 8.290  | 13.750 | 0.635 | 0.950 | <a href="https://doi.org/10.1002/afm.201707493">https://doi.org/10.1002/afm.201707493</a>   |
| 117. | PTB7-Th        | Meta-TrBRCN  | 10.150 | 16.750 | 0.645 | 0.940 | <a href="https://doi.org/10.1002/afm.201707493">https://doi.org/10.1002/afm.201707493</a>   |
| 118. | PTB7-Th        | ITIC         | 6.800  | 14.210 | 0.591 | 0.810 | <a href="https://doi.org/10.1002/adma.201404317">https://doi.org/10.1002/adma.201404317</a> |
| 119. | PfFT2-FTAZ-2DT | IEIC         | 7.300  | 12.200 | 0.590 | 0.998 | <a href="https://doi.org/10.1002/adma.201502775">https://doi.org/10.1002/adma.201502775</a> |

|      |          |          |        |        |       |       |                                                                                             |
|------|----------|----------|--------|--------|-------|-------|---------------------------------------------------------------------------------------------|
| 120. | PPDT2FBT | NIDCS-HO | 7.640  | 11.880 | 0.630 | 1.030 | <a href="https://doi.org/10.1002/adma.201504091">https://doi.org/10.1002/adma.201504091</a> |
| 121. | PBDB-T   | ITIC     | 11.210 | 16.810 | 0.742 | 0.899 | <a href="https://doi.org/10.1002/adma.201600281">https://doi.org/10.1002/adma.201600281</a> |
| 122. | J51      | ITIC     | 9.260  | 16.470 | 0.690 | 0.820 | <a href="https://doi.org/10.1002/adma.201601595">https://doi.org/10.1002/adma.201601595</a> |
| 123. | J50      | ITIC     | 4.800  | 12.930 | 0.530 | 0.710 | <a href="https://doi.org/10.1002/adma.201601595">https://doi.org/10.1002/adma.201601595</a> |
| 124. | PBDB-T   | IT-M     | 12.050 | 17.440 | 0.735 | 0.940 | <a href="https://doi.org/10.1002/adma.201602776">https://doi.org/10.1002/adma.201602776</a> |
| 125. | PBDB-T   | IT-DM    | 11.290 | 16.480 | 0.706 | 0.970 | <a href="https://doi.org/10.1002/adma.201602776">https://doi.org/10.1002/adma.201602776</a> |
| 126. | PPBDTBT  | ITIC     | 7.720  | 13.000 | 0.630 | 0.925 | <a href="https://doi.org/10.1002/adma.201603588">https://doi.org/10.1002/adma.201603588</a> |
| 127. | PDBT-T1  | ITIC-Th  | 6.430  | 11.700 | 0.594 | 0.919 | <a href="https://doi.org/10.1002/adma.201602570">https://doi.org/10.1002/adma.201602570</a> |
| 128. | PBDB-T   | DICTF    | 5.930  | 10.300 | 0.590 | 0.930 | <a href="https://doi.org/10.1002/adma.201604964">https://doi.org/10.1002/adma.201604964</a> |
| 129. | PBDB-T   | FDICTF   | 10.060 | 15.810 | 0.660 | 0.940 | <a href="https://doi.org/10.1002/adma.201604964">https://doi.org/10.1002/adma.201604964</a> |
| 130. | PTzBI-DT | ITIC     | 9.430  | 16.840 | 0.615 | 0.910 | <a href="https://doi.org/10.1002/adma.201606396">https://doi.org/10.1002/adma.201606396</a> |
| 131. | PTzBI    | ITIC     | 10.240 | 18.290 | 0.643 | 0.870 | <a href="https://doi.org/10.1002/adma.201606396">https://doi.org/10.1002/adma.201606396</a> |
| 132. | FTAZ     | ITIC-Th  | 8.880  | 15.840 | 0.613 | 0.915 | <a href="https://doi.org/10.1002/adma.201700144">https://doi.org/10.1002/adma.201700144</a> |
| 133. | FTAZ     | ITIC-Th1 | 12.100 | 19.330 | 0.737 | 0.849 | <a href="https://doi.org/10.1002/adma.201700144">https://doi.org/10.1002/adma.201700144</a> |
| 134. | PBDB-T   | ITCC     | 11.400 | 15.900 | 0.710 | 1.010 | <a href="https://doi.org/10.1002/adma.201700254">https://doi.org/10.1002/adma.201700254</a> |
| 135. | PBDB-T   | ITIC     | 10.600 | 17.000 | 0.670 | 0.930 | <a href="https://doi.org/10.1002/adma.201700254">https://doi.org/10.1002/adma.201700254</a> |

|      |           |           |        |        |       |       |                                                                                             |
|------|-----------|-----------|--------|--------|-------|-------|---------------------------------------------------------------------------------------------|
| 136. | J52       | IT-M      | 9.400  | 17.100 | 0.651 | 0.843 | <a href="https://doi.org/10.1002/adma.201700437">https://doi.org/10.1002/adma.201700437</a> |
| 137. | J52       | IEICO     | 6.500  | 15.100 | 0.510 | 0.848 | <a href="https://doi.org/10.1002/adma.201700437">https://doi.org/10.1002/adma.201700437</a> |
| 138. | FTAZ      | ITIC1     | 8.110  | 15.670 | 0.561 | 0.920 | <a href="https://doi.org/10.1002/adma.201702125">https://doi.org/10.1002/adma.201702125</a> |
| 139. | FTAZ      | ITIC2     | 11.000 | 18.630 | 0.620 | 0.922 | <a href="https://doi.org/10.1002/adma.201702125">https://doi.org/10.1002/adma.201702125</a> |
| 140. | PTZ1      | IDIC      | 11.500 | 16.400 | 0.762 | 0.920 | <a href="https://doi.org/10.1002/adma.201702291">https://doi.org/10.1002/adma.201702291</a> |
| 141. | J52       | IEICO-4C1 | 10.100 | 23.800 | 0.607 | 0.700 | <a href="https://doi.org/10.1002/adma.201703080">https://doi.org/10.1002/adma.201703080</a> |
| 142. | PBDB-T    | IEICO-4C1 | 9.670  | 20.800 | 0.625 | 0.744 | <a href="https://doi.org/10.1002/adma.201703080">https://doi.org/10.1002/adma.201703080</a> |
| 143. | PTB7-Th   | IEICO-4C1 | 10.300 | 22.800 | 0.620 | 0.727 | <a href="https://doi.org/10.1002/adma.201703080">https://doi.org/10.1002/adma.201703080</a> |
| 144. | PBDB-T    | SFBRCN    | 9.390  | 13.650 | 0.709 | 0.970 | <a href="https://doi.org/10.1002/adma.201704271">https://doi.org/10.1002/adma.201704271</a> |
| 145. | PBDB-T    | IT-M      | 10.890 | 17.050 | 0.681 | 0.937 | <a href="https://doi.org/10.1002/adma.201703005">https://doi.org/10.1002/adma.201703005</a> |
| 146. | PBDT-TDZ  | ITIC      | 11.720 | 17.150 | 0.677 | 1.010 | <a href="https://doi.org/10.1002/adma.201703973">https://doi.org/10.1002/adma.201703973</a> |
| 147. | PBDTS-TDZ | ITIC      | 12.800 | 17.780 | 0.654 | 1.100 | <a href="https://doi.org/10.1002/adma.201703973">https://doi.org/10.1002/adma.201703973</a> |
| 148. | PM6       | IDIC      | 11.500 | 17.300 | 0.700 | 0.950 | <a href="https://doi.org/10.1002/adma.201704546">https://doi.org/10.1002/adma.201704546</a> |
| 149. | FTAZ      | IHIC2     | 7.450  | 15.700 | 0.612 | 0.775 | <a href="https://doi.org/10.1002/adma.201704713">https://doi.org/10.1002/adma.201704713</a> |
| 150. | FTAZ      | IOIC2     | 12.300 | 19.700 | 0.693 | 0.900 | <a href="https://doi.org/10.1002/adma.201704713">https://doi.org/10.1002/adma.201704713</a> |
| 151. | PBDB-T    | NFBBDT    | 10.420 | 17.850 | 0.672 | 0.868 | <a href="https://doi.org/10.1002/adma.201704904">https://doi.org/10.1002/adma.201704904</a> |

|      |         |          |        |        |       |       |                                                                                             |
|------|---------|----------|--------|--------|-------|-------|---------------------------------------------------------------------------------------------|
| 152. | PBDB-T  | NCBDT    | 12.120 | 20.330 | 0.710 | 0.839 | <a href="https://doi.org/10.1002/adma.201704904">https://doi.org/10.1002/adma.201704904</a> |
| 153. | PTB7-Th | NCBDT    | 9.890  | 18.640 | 0.685 | 0.775 | <a href="https://doi.org/10.1002/adma.201704904">https://doi.org/10.1002/adma.201704904</a> |
| 154. | PBDB-T  | DF-PCIC  | 10.140 | 15.660 | 0.720 | 0.910 | <a href="https://doi.org/10.1002/adma.201705208">https://doi.org/10.1002/adma.201705208</a> |
| 155. | PBDB-T  | ITIC     | 10.000 | 17.000 | 0.660 | 0.890 | <a href="https://doi.org/10.1002/adma.201705209">https://doi.org/10.1002/adma.201705209</a> |
| 156. | PBDB-T  | C8-ITIC  | 12.410 | 19.700 | 0.730 | 0.870 | <a href="https://doi.org/10.1002/adma.201705209">https://doi.org/10.1002/adma.201705209</a> |
| 157. | PFBDB-T | ITIC     | 11.710 | 18.500 | 0.660 | 0.950 | <a href="https://doi.org/10.1002/adma.201705209">https://doi.org/10.1002/adma.201705209</a> |
| 158. | PFBDB-T | C8-ITIC  | 13.200 | 19.600 | 0.720 | 0.940 | <a href="https://doi.org/10.1002/adma.201705209">https://doi.org/10.1002/adma.201705209</a> |
| 159. | J71     | ITCPTC   | 11.630 | 17.520 | 0.741 | 0.896 | <a href="https://doi.org/10.1002/adma.201706124">https://doi.org/10.1002/adma.201706124</a> |
| 160. | J71     | MeIC     | 12.540 | 18.410 | 0.742 | 0.918 | <a href="https://doi.org/10.1002/adma.201706124">https://doi.org/10.1002/adma.201706124</a> |
| 161. | FTAZ    | IDIC     | 12.500 | 20.800 | 0.718 | 0.840 | <a href="https://doi.org/10.1002/adma.201706363">https://doi.org/10.1002/adma.201706363</a> |
| 162. | PBDB-T  | INPIC    | 4.310  | 8.550  | 0.525 | 0.960 | <a href="https://doi.org/10.1002/adma.201707150">https://doi.org/10.1002/adma.201707150</a> |
| 163. | PBDB-T  | INPIC-4F | 13.130 | 21.610 | 0.715 | 0.850 | <a href="https://doi.org/10.1002/adma.201707150">https://doi.org/10.1002/adma.201707150</a> |
| 164. | PBDB-TF | IT-M     | 10.500 | 15.780 | 0.650 | 1.020 | <a href="https://doi.org/10.1002/adma.201707170">https://doi.org/10.1002/adma.201707170</a> |
| 165. | PBDB-TF | IT-4F    | 13.700 | 20.380 | 0.770 | 0.870 | <a href="https://doi.org/10.1002/adma.201707170">https://doi.org/10.1002/adma.201707170</a> |
| 166. | PBDB-T  | F-H      | 10.060 | 15.810 | 0.670 | 0.940 | <a href="https://doi.org/10.1002/adma.201707508">https://doi.org/10.1002/adma.201707508</a> |
| 167. | PBDB-T  | F-M      | 10.290 | 14.560 | 0.710 | 0.980 | <a href="https://doi.org/10.1002/adma.201707508">https://doi.org/10.1002/adma.201707508</a> |



|      |           |           |        |        |       |       |                                                                                             |
|------|-----------|-----------|--------|--------|-------|-------|---------------------------------------------------------------------------------------------|
| 168. | PTB7-Th   | NFBDT     | 6.740  | 14.590 | 0.580 | 0.800 | <a href="https://doi.org/10.1002/adma.201707508">https://doi.org/10.1002/adma.201707508</a> |
| 169. | PTB7-Th   | NOBDT     | 10.550 | 19.160 | 0.700 | 0.770 | <a href="https://doi.org/10.1002/adma.201707508">https://doi.org/10.1002/adma.201707508</a> |
| 170. | PBDB-T    | IDTCN     | 6.400  | 12.060 | 0.625 | 0.850 | <a href="https://doi.org/10.1002/adma.201800052">https://doi.org/10.1002/adma.201800052</a> |
| 171. | PBDB-T    | ITCPTC    | 10.740 | 17.530 | 0.728 | 0.840 | <a href="https://doi.org/10.1002/adma.201800052">https://doi.org/10.1002/adma.201800052</a> |
| 172. | PBDB-T    | IDT6CN    | 9.200  | 15.140 | 0.738 | 0.830 | <a href="https://doi.org/10.1002/adma.201800052">https://doi.org/10.1002/adma.201800052</a> |
| 173. | PBDB-T    | IDT6CN-Th | 10.410 | 16.750 | 0.767 | 0.810 | <a href="https://doi.org/10.1002/adma.201800052">https://doi.org/10.1002/adma.201800052</a> |
| 174. | PBDB-T    | IDT6CN-M  | 11.200 | 16.020 | 0.768 | 0.910 | <a href="https://doi.org/10.1002/adma.201800052">https://doi.org/10.1002/adma.201800052</a> |
| 175. | PBDT-T-2F | IT-4Cl    | 13.450 | 22.670 | 0.752 | 0.790 | <a href="https://doi.org/10.1002/adma.201800613">https://doi.org/10.1002/adma.201800613</a> |
| 176. | PBDT-T-2F | IT-2Cl    | 13.160 | 19.080 | 0.748 | 0.922 | <a href="https://doi.org/10.1002/adma.201800613">https://doi.org/10.1002/adma.201800613</a> |
| 177. | PBDT-ODZ  | ITIC-Th   | 12.340 | 17.020 | 0.681 | 1.060 | <a href="https://doi.org/10.1002/adma.201800737">https://doi.org/10.1002/adma.201800737</a> |
| 178. | PBDB-T-2F | IT-4F     | 13.200 | 20.810 | 0.760 | 0.840 | <a href="https://doi.org/10.1002/adma.201800868">https://doi.org/10.1002/adma.201800868</a> |
| 179. | PBDB-T-2F | IT-4F     | 14.400 | 21.800 | 0.770 | 0.860 | <a href="https://doi.org/10.1002/adma.201800868">https://doi.org/10.1002/adma.201800868</a> |
| 180. | PTB7-Th   | 3TT-FIC   | 12.210 | 25.890 | 0.712 | 0.662 | <a href="https://doi.org/10.1002/advs.201800307">https://doi.org/10.1002/advs.201800307</a> |
| 181. | P3HT      | N5        | 2.850  | 7.910  | 0.460 | 0.610 | <a href="https://doi.org/10.1002/ajoc.201500207">https://doi.org/10.1002/ajoc.201500207</a> |
| 182. | PBDB-T    | IDTBOR    | 7.740  | 15.980 | 0.547 | 0.890 | <a href="https://doi.org/10.1002/ajoc.201800389">https://doi.org/10.1002/ajoc.201800389</a> |
| 183. | PBDB-T    | IDTBSR    | 6.950  | 13.950 | 0.524 | 0.950 | <a href="https://doi.org/10.1002/ajoc.201800389">https://doi.org/10.1002/ajoc.201800389</a> |

|      |         |          |        |        |       |       |                                                                                                             |
|------|---------|----------|--------|--------|-------|-------|-------------------------------------------------------------------------------------------------------------|
| 184. | P3HT    | Th-PhCHO | 2.400  | 5.140  | 0.450 | 1.030 | <a href="https://doi.org/10.1039/C3CC47289B">https://doi.org/10.1039/C3CC47289B</a>                         |
| 185. | P2      | NI-AA-NI | 3.710  | 6.290  | 0.550 | 1.070 | <a href="https://doi.org/10.1039/C5CC08023A">https://doi.org/10.1039/C5CC08023A</a>                         |
| 186. | PTB7-Th | FRd2     | 9.400  | 15.700 | 0.723 | 0.833 | <a href="https://doi.org/10.1039/C7CC08237A">https://doi.org/10.1039/C7CC08237A</a>                         |
| 187. | PSEHTT  | FTB      | 5.420  | 8.170  | 0.520 | 1.150 | <a href="https://doi.org/10.1039/C7CC09123K">https://doi.org/10.1039/C7CC09123K</a>                         |
| 188. | PSEHTT  | FTTB     | 7.170  | 12.470 | 0.510 | 1.000 | <a href="https://doi.org/10.1039/C7CC09123K">https://doi.org/10.1039/C7CC09123K</a>                         |
| 189. | PTB7-Th | FBM      | 5.100  | 11.200 | 0.510 | 0.880 | <a href="https://doi.org/10.1021/a cs.chemmater.6b00131">https://doi.org/10.1021/a cs.chemmater.6b00131</a> |
| 190. | PTB7-Th | CBM      | 5.300  | 10.600 | 0.530 | 0.880 | <a href="https://doi.org/10.1021/a cs.chemmater.6b00131">https://doi.org/10.1021/a cs.chemmater.6b00131</a> |
| 191. | PTB7-Th | CDTBM    | 5.000  | 11.900 | 0.600 | 0.660 | <a href="https://doi.org/10.1021/a cs.chemmater.6b00131">https://doi.org/10.1021/a cs.chemmater.6b00131</a> |
| 192. | P3HT    | SF-OR    | 4.660  | 7.300  | 0.629 | 0.965 | <a href="https://doi.org/10.1021/a cs.chemmater.6b03323">https://doi.org/10.1021/a cs.chemmater.6b03323</a> |
| 193. | P3HT    | SF-ORCN  | 4.480  | 7.580  | 0.633 | 0.912 | <a href="https://doi.org/10.1021/a cs.chemmater.6b03323">https://doi.org/10.1021/a cs.chemmater.6b03323</a> |
| 194. | PBTA-BO | IffBR    | 6.340  | 11.770 | 0.523 | 1.013 | <a href="https://doi.org/10.1021/a cs.chemmater.7b02228">https://doi.org/10.1021/a cs.chemmater.7b02228</a> |
| 195. | PTB7-Th | IHIC-N   | 6.910  | 13.500 | 0.606 | 0.846 | <a href="https://doi.org/10.1021/a cs.chemmater.7b04499">https://doi.org/10.1021/a cs.chemmater.7b04499</a> |
| 196. | PTB7-Th | IHIC     | 10.600 | 19.400 | 0.725 | 0.752 | <a href="https://doi.org/10.1021/a cs.chemmater.7b04499">https://doi.org/10.1021/a cs.chemmater.7b04499</a> |
| 197. | PBDB-T  | NCIC     | 7.310  | 12.690 | 0.576 | 1.000 | <a href="https://doi.org/10.1021/a cs.chemmater.8b01089">https://doi.org/10.1021/a cs.chemmater.8b01089</a> |
| 198. | PBDB-T  | NCFIC    | 7.520  | 15.190 | 0.563 | 0.880 | <a href="https://doi.org/10.1021/a cs.chemmater.8b01089">https://doi.org/10.1021/a cs.chemmater.8b01089</a> |
| 199. | PBDB-T  | SN6IC    | 9.600  | 16.500 | 0.660 | 0.880 | <a href="https://doi.org/10.1021/a cs.chemmater.8b02276">https://doi.org/10.1021/a cs.chemmater.8b02276</a> |
| 200. | PBDB-T  | SN6IC-4F | 13.200 | 23.200 | 0.730 | 0.780 | <a href="https://doi.org/10.1021/a cs.chemmater.8b02276">https://doi.org/10.1021/a cs.chemmater.8b02276</a> |

|      |         |           |        |        |       |       |                                                                                             |
|------|---------|-----------|--------|--------|-------|-------|---------------------------------------------------------------------------------------------|
| 201. | PBDB-T  | PTIC      | 7.660  | 14.200 | 0.640 | 0.840 | <a href="https://doi.org/10.1002/cssc.201701917">https://doi.org/10.1002/cssc.201701917</a> |
| 202. | P3HT    | BTA21     | 3.280  | 5.450  | 0.590 | 1.020 | <a href="https://doi.org/10.1002/cco.201700792">https://doi.org/10.1002/cco.201700792</a>   |
| 203. | P3HT    | BTA27     | 0.200  | 1.070  | 0.400 | 0.470 | <a href="https://doi.org/10.1002/cco.201700792">https://doi.org/10.1002/cco.201700792</a>   |
| 204. | PBDB-T  | SiIDT-IC  | 8.160  | 13.530 | 0.656 | 0.920 | <a href="https://doi.org/10.1002/cco.201700809">https://doi.org/10.1002/cco.201700809</a>   |
| 205. | PBDB-T  | IDIC      | 8.830  | 16.690 | 0.654 | 0.810 | <a href="https://doi.org/10.1002/cco.201700809">https://doi.org/10.1002/cco.201700809</a>   |
| 206. | PTB7-Th | IEIC      | 6.310  | 13.550 | 0.480 | 0.970 | <a href="https://doi.org/10.1039/C4EE03424D">https://doi.org/10.1039/C4EE03424D</a>         |
| 207. | J51     | IDSe-T-IC | 8.580  | 15.200 | 0.620 | 0.910 | <a href="https://doi.org/10.1039/C6EE00315J">https://doi.org/10.1039/C6EE00315J</a>         |
| 208. | PB3T    | IT-M      | 11.900 | 18.900 | 0.630 | 1.000 | <a href="https://doi.org/10.1039/C6EE03489F">https://doi.org/10.1039/C6EE03489F</a>         |
| 209. | J61     | BT-IC     | 9.560  | 16.350 | 0.671 | 0.870 | <a href="https://doi.org/10.1039/C7EE00844A">https://doi.org/10.1039/C7EE00844A</a>         |
| 210. | J71     | BT-IC     | 10.460 | 17.750 | 0.657 | 0.900 | <a href="https://doi.org/10.1039/C7EE00844A">https://doi.org/10.1039/C7EE00844A</a>         |
| 211. | PBDB-T  | IDT6CN-M  | 11.020 | 16.000 | 0.753 | 0.915 | <a href="https://doi.org/10.1039/C8EE00215K">https://doi.org/10.1039/C8EE00215K</a>         |
| 212. | PBDB-T  | ITCPTC    | 10.510 | 17.440 | 0.721 | 0.836 | <a href="https://doi.org/10.1039/C8EE00215K">https://doi.org/10.1039/C8EE00215K</a>         |
| 213. | PBDB-T  | INPIC-4F  | 12.550 | 20.810 | 0.709 | 0.850 | <a href="https://doi.org/10.1039/C8EE01107A">https://doi.org/10.1039/C8EE01107A</a>         |
| 214. | PBDB-T  | MeIC1     | 11.530 | 17.530 | 0.731 | 0.900 | <a href="https://doi.org/10.1039/C8EE01107A">https://doi.org/10.1039/C8EE01107A</a>         |
| 215. | P3HT    | FBR       | 4.110  | 7.950  | 0.630 | 0.820 | <a href="https://doi.org/10.1021/ja5110602">https://doi.org/10.1021/ja5110602</a>           |
| 216. | J52     | ITIC      | 5.510  | 13.110 | 0.578 | 0.730 | <a href="https://doi.org/10.1021/jacs.6b01744">https://doi.org/10.1021/jacs.6b01744</a>     |
| 217. | J60     | ITIC      | 8.970  | 16.330 | 0.604 | 0.910 | <a href="https://doi.org/10.1021/jacs.6b01744">https://doi.org/10.1021/jacs.6b01744</a>     |
| 218. | J61     | ITIC      | 9.530  | 17.430 | 0.615 | 0.890 | <a href="https://doi.org/10.1021/jacs.6b01744">https://doi.org/10.1021/jacs.6b01744</a>     |

|      |            |           |        |        |       |       |                                                                                         |
|------|------------|-----------|--------|--------|-------|-------|-----------------------------------------------------------------------------------------|
| 219. | J61        | ITIC      | 10.570 | 17.970 | 0.655 | 0.898 | <a href="https://doi.org/10.1021/jacs.6b09110">https://doi.org/10.1021/jacs.6b09110</a> |
| 220. | J61        | m-ITIC    | 11.770 | 18.310 | 0.706 | 0.912 | <a href="https://doi.org/10.1021/jacs.6b09110">https://doi.org/10.1021/jacs.6b09110</a> |
| 221. | PTB7-Th    | ATT-1     | 10.070 | 16.480 | 0.700 | 0.870 | <a href="https://doi.org/10.1021/jacs.6b08523">https://doi.org/10.1021/jacs.6b08523</a> |
| 222. | PBDB-T     | NFBDT     | 10.150 | 17.850 | 0.672 | 0.868 | <a href="https://doi.org/10.1021/jacs.7b01170">https://doi.org/10.1021/jacs.7b01170</a> |
| 223. | PvBDTTAZ   | O-IDTBR   | 11.600 | 16.260 | 0.636 | 1.080 | <a href="https://doi.org/10.1021/jacs.7b01606">https://doi.org/10.1021/jacs.7b01606</a> |
| 224. | PTB7-Th    | BT-IC     | 8.300  | 17.500 | 0.596 | 0.810 | <a href="https://doi.org/10.1021/jacs.7b11278">https://doi.org/10.1021/jacs.7b11278</a> |
| 225. | PTB7-Th    | BT-CIC    | 11.200 | 22.500 | 0.710 | 0.700 | <a href="https://doi.org/10.1021/jacs.7b11278">https://doi.org/10.1021/jacs.7b11278</a> |
| 226. | P1         | IT-4F     | 11.500 | 20.050 | 0.640 | 0.896 | <a href="https://doi.org/10.1021/jacs.8b02695">https://doi.org/10.1021/jacs.8b02695</a> |
| 227. | P1         | IT-4F     | 14.200 | 20.730 | 0.760 | 0.900 | <a href="https://doi.org/10.1021/jacs.8b02695">https://doi.org/10.1021/jacs.8b02695</a> |
| 228. | P1         | IT-4F     | 11.200 | 20.310 | 0.610 | 0.904 | <a href="https://doi.org/10.1021/jacs.8b02695">https://doi.org/10.1021/jacs.8b02695</a> |
| 229. | PBDTTT-C-T | DC-IDT2T  | 3.930  | 8.330  | 0.523 | 0.900 | <a href="https://doi.org/10.1039/C4TA06004K">https://doi.org/10.1039/C4TA06004K</a>     |
| 230. | PBDTTT-C-T | IDT-2BM   | 4.260  | 10.100 | 0.551 | 0.766 | <a href="https://doi.org/10.1039/C5TA05901A">https://doi.org/10.1039/C5TA05901A</a>     |
| 231. | PBDTTT-C-T | IDTT-2BM  | 4.810  | 9.870  | 0.572 | 0.851 | <a href="https://doi.org/10.1039/C5TA05901A">https://doi.org/10.1039/C5TA05901A</a>     |
| 232. | P          | DPP7      | 4.860  | 10.560 | 0.490 | 0.940 | <a href="https://doi.org/10.1039/C6TA09607G">https://doi.org/10.1039/C6TA09607G</a>     |
| 233. | P          | DPP8      | 7.190  | 13.780 | 0.580 | 0.900 | <a href="https://doi.org/10.1039/C6TA09607G">https://doi.org/10.1039/C6TA09607G</a>     |
| 234. | PTB7-Th    | DTCC-IC   | 6.000  | 11.230 | 0.560 | 0.950 | <a href="https://doi.org/10.1039/C7TA01143A">https://doi.org/10.1039/C7TA01143A</a>     |
| 235. | PBDB-T     | FTIC-C8C6 | 10.450 | 16.690 | 0.677 | 0.920 | <a href="https://doi.org/10.1039/C7TA02141K">https://doi.org/10.1039/C7TA02141K</a>     |
| 236. | PBDB-T     | FTIC-C6C6 | 9.750  | 16.840 | 0.634 | 0.910 | <a href="https://doi.org/10.1039/C7TA02141K">https://doi.org/10.1039/C7TA02141K</a>     |

|      |          |           |        |        |       |       |                                                                                     |
|------|----------|-----------|--------|--------|-------|-------|-------------------------------------------------------------------------------------|
| 237. | PBDB-T   | FTIC-C6C8 | 11.120 | 18.550 | 0.647 | 0.930 | <a href="https://doi.org/10.1039/C7TA02141K">https://doi.org/10.1039/C7TA02141K</a> |
| 238. | PSBZ     | ITIC      | 10.500 | 19.000 | 0.620 | 0.890 | <a href="https://doi.org/10.1039/C7TA02075A">https://doi.org/10.1039/C7TA02075A</a> |
| 239. | PBDB-T1  | ITIC      | 9.050  | 16.110 | 0.640 | 0.870 | <a href="https://doi.org/10.1039/C7TA01554B">https://doi.org/10.1039/C7TA01554B</a> |
| 240. | PBDB-T1  | ITTIC     | 9.120  | 15.930 | 0.620 | 0.920 | <a href="https://doi.org/10.1039/C7TA01554B">https://doi.org/10.1039/C7TA01554B</a> |
| 241. | P1       | PY-1      | 4.890  | 10.530 | 0.560 | 0.830 | <a href="https://doi.org/10.1039/C7TA04703G">https://doi.org/10.1039/C7TA04703G</a> |
| 242. | P1       | DCI-2     | 6.940  | 13.770 | 0.630 | 0.800 | <a href="https://doi.org/10.1039/C7TA04703G">https://doi.org/10.1039/C7TA04703G</a> |
| 243. | P3HT     | ATT-3     | 6.260  | 10.930 | 0.620 | 0.927 | <a href="https://doi.org/10.1039/C7TA05108E">https://doi.org/10.1039/C7TA05108E</a> |
| 244. | PBDB-T   | NTIC      | 8.630  | 13.550 | 0.681 | 0.935 | <a href="https://doi.org/10.1039/C7TA05809H">https://doi.org/10.1039/C7TA05809H</a> |
| 245. | PBDB-T   | NTIC-Me   | 8.300  | 13.030 | 0.662 | 0.963 | <a href="https://doi.org/10.1039/C7TA05809H">https://doi.org/10.1039/C7TA05809H</a> |
| 246. | PBDB-T   | NTIC-Ome  | 8.610  | 13.520 | 0.660 | 0.965 | <a href="https://doi.org/10.1039/C7TA05809H">https://doi.org/10.1039/C7TA05809H</a> |
| 247. | PBDB-T   | NTIC-F    | 8.100  | 15.040 | 0.663 | 0.812 | <a href="https://doi.org/10.1039/C7TA05809H">https://doi.org/10.1039/C7TA05809H</a> |
| 248. | PBDB-T   | ITIC      | 9.700  | 16.000 | 0.580 | 1.040 | <a href="https://doi.org/10.1039/C7TA07785H">https://doi.org/10.1039/C7TA07785H</a> |
| 249. | FTAZ     | ITIC      | 8.370  | 16.250 | 0.565 | 0.911 | <a href="https://doi.org/10.1039/C7TA07882J">https://doi.org/10.1039/C7TA07882J</a> |
| 250. | HTAZ     | ITIC      | 4.260  | 12.540 | 0.399 | 0.851 | <a href="https://doi.org/10.1039/C7TA07882J">https://doi.org/10.1039/C7TA07882J</a> |
| 251. | PBDB-T   | ITIC      | 8.500  | 14.800 | 0.670 | 0.850 | <a href="https://doi.org/10.1039/C7TA10136H">https://doi.org/10.1039/C7TA10136H</a> |
| 252. | PBDB-T   | ITIC-OE   | 10.400 | 16.500 | 0.710 | 0.890 | <a href="https://doi.org/10.1039/C7TA10136H">https://doi.org/10.1039/C7TA10136H</a> |
| 253. | PTB7-Th  | ITCT      | 10.420 | 15.130 | 0.720 | 0.950 | <a href="https://doi.org/10.1039/C7TA10391C">https://doi.org/10.1039/C7TA10391C</a> |
| 254. | 2D-PBTCl | ITIC      | 8.810  | 15.790 | 0.613 | 0.910 | <a href="https://doi.org/10.1039/C7TA09837E">https://doi.org/10.1039/C7TA09837E</a> |

|      |           |           |        |        |       |       |                                                                                     |
|------|-----------|-----------|--------|--------|-------|-------|-------------------------------------------------------------------------------------|
| 255. | 2D-PBTC12 | ITIC      | 7.380  | 14.520 | 0.584 | 0.870 | <a href="https://doi.org/10.1039/C7TA09837E">https://doi.org/10.1039/C7TA09837E</a> |
| 256. | PTB7-Th   | ITIC      | 6.910  | 14.760 | 0.571 | 0.820 | <a href="https://doi.org/10.1039/C7TA09837E">https://doi.org/10.1039/C7TA09837E</a> |
| 257. | TTFQx-T1  | ITIC      | 10.520 | 16.880 | 0.692 | 0.900 | <a href="https://doi.org/10.1039/C7TA10262C">https://doi.org/10.1039/C7TA10262C</a> |
| 258. | TTFQx-T2  | ITIC      | 7.220  | 13.750 | 0.561 | 0.940 | <a href="https://doi.org/10.1039/C7TA10262C">https://doi.org/10.1039/C7TA10262C</a> |
| 259. | PTB7-Th   | NFDTS     | 6.150  | 18.770 | 0.489 | 0.665 | <a href="https://doi.org/10.1039/C7TA10957A">https://doi.org/10.1039/C7TA10957A</a> |
| 260. | PTB7-Th   | NFDTSB    | 9.600  | 20.140 | 0.633 | 0.744 | <a href="https://doi.org/10.1039/C7TA10957A">https://doi.org/10.1039/C7TA10957A</a> |
| 261. | PBDB-T    | IT-M      | 11.740 | 17.020 | 0.720 | 0.950 | <a href="https://doi.org/10.1039/C8TA00368H">https://doi.org/10.1039/C8TA00368H</a> |
| 262. | PBDB-T-BO | IT-M      | 10.780 | 15.680 | 0.700 | 0.970 | <a href="https://doi.org/10.1039/C8TA00368H">https://doi.org/10.1039/C8TA00368H</a> |
| 263. | PBDB-BzT  | IT-M      | 12.100 | 17.630 | 0.690 | 0.960 | <a href="https://doi.org/10.1039/C8TA00368H">https://doi.org/10.1039/C8TA00368H</a> |
| 264. | J71       | m-MeIC    | 12.080 | 18.450 | 0.692 | 0.919 | <a href="https://doi.org/10.1039/C7TA11339K">https://doi.org/10.1039/C7TA11339K</a> |
| 265. | PBDB-T    | m-MeIC    | 10.930 | 18.160 | 0.697 | 0.843 | <a href="https://doi.org/10.1039/C7TA11339K">https://doi.org/10.1039/C7TA11339K</a> |
| 266. | PTB7-Th   | m-MeIC    | 8.340  | 16.520 | 0.617 | 0.796 | <a href="https://doi.org/10.1039/C7TA11339K">https://doi.org/10.1039/C7TA11339K</a> |
| 267. | PBDB-T    | IDT2Se    | 9.360  | 17.310 | 0.598 | 0.880 | <a href="https://doi.org/10.1039/C8TA00783G">https://doi.org/10.1039/C8TA00783G</a> |
| 268. | PBDB-T    | IDT2Se-4F | 11.190 | 21.350 | 0.654 | 0.790 | <a href="https://doi.org/10.1039/C8TA00783G">https://doi.org/10.1039/C8TA00783G</a> |
| 269. | PTB7-Th   | D5T6F-M   | 4.500  | 8.700  | 0.469 | 1.050 | <a href="https://doi.org/10.1039/C8TA02781A">https://doi.org/10.1039/C8TA02781A</a> |
| 270. | PBDB-TF   | HF-PCIC   | 11.490 | 17.810 | 0.708 | 0.910 | <a href="https://doi.org/10.1039/C8TA03753A">https://doi.org/10.1039/C8TA03753A</a> |
| 271. | PBDB-TF   | HFO-PCIC  | 8.360  | 12.620 | 0.710 | 0.930 | <a href="https://doi.org/10.1039/C8TA03753A">https://doi.org/10.1039/C8TA03753A</a> |
| 272. | PBDB-TF   | OFcPCIC   | 9.090  | 13.760 | 0.734 | 0.910 | <a href="https://doi.org/10.1039/C8TA03753A">https://doi.org/10.1039/C8TA03753A</a> |

|      |             |           |        |        |       |       |                                                                                                           |
|------|-------------|-----------|--------|--------|-------|-------|-----------------------------------------------------------------------------------------------------------|
| 273. | PTB7-Th     | PhITBD    | 6.570  | 14.070 | 0.620 | 0.767 | <a href="https://doi.org/10.1039/C7TC00706J">https://doi.org/10.1039/C7TC00706J</a>                       |
| 274. | P1          | ITIC      | 7.140  | 14.110 | 0.634 | 0.780 | <a href="https://doi.org/10.1039/C7TC02098H">https://doi.org/10.1039/C7TC02098H</a>                       |
| 275. | P2          | ITIC      | 4.170  | 9.340  | 0.529 | 0.800 | <a href="https://doi.org/10.1039/C7TC02098H">https://doi.org/10.1039/C7TC02098H</a>                       |
| 276. | P3          | ITIC      | 3.660  | 7.580  | 0.569 | 0.830 | <a href="https://doi.org/10.1039/C7TC02098H">https://doi.org/10.1039/C7TC02098H</a>                       |
| 277. | PBDTTz-BP   | ITIC      | 8.030  | 17.700 | 0.560 | 0.810 | <a href="https://doi.org/10.1039/C7TC04750A">https://doi.org/10.1039/C7TC04750A</a>                       |
| 278. | PBDTTz-N    | ITIC      | 6.610  | 18.000 | 0.490 | 0.750 | <a href="https://doi.org/10.1039/C7TC04750A">https://doi.org/10.1039/C7TC04750A</a>                       |
| 279. | PffBT4T-2OD | BAF-2HDT  | 7.130  | 14.640 | 0.640 | 0.770 | <a href="https://doi.org/10.1021/a cs.jpcc.6b07778">https://doi.org/10.1021/a cs.jpcc.6b07778</a>         |
| 280. | PB1         | ITIC      | 9.560  | 16.100 | 0.655 | 0.907 | <a href="https://doi.org/10.1021/a cs.jpcc.6b11848">https://doi.org/10.1021/a cs.jpcc.6b11848</a>         |
| 281. | PB1-S       | ITIC      | 10.490 | 17.840 | 0.625 | 0.941 | <a href="https://doi.org/10.1021/a cs.jpcc.6b11848">https://doi.org/10.1021/a cs.jpcc.6b11848</a>         |
| 282. | PB2         | ITIC      | 3.720  | 12.410 | 0.478 | 0.628 | <a href="https://doi.org/10.1021/a cs.jpcc.6b11848">https://doi.org/10.1021/a cs.jpcc.6b11848</a>         |
| 283. | PB2-S       | ITIC      | 5.350  | 14.610 | 0.501 | 0.730 | <a href="https://doi.org/10.1021/a cs.jpcc.6b11848">https://doi.org/10.1021/a cs.jpcc.6b11848</a>         |
| 284. | PB3         | ITIC      | 6.610  | 13.470 | 0.598 | 0.822 | <a href="https://doi.org/10.1021/a cs.jpcc.6b11848">https://doi.org/10.1021/a cs.jpcc.6b11848</a>         |
| 285. | PB3-S       | ITIC      | 8.280  | 16.930 | 0.560 | 0.873 | <a href="https://doi.org/10.1021/a cs.jpcc.6b11848">https://doi.org/10.1021/a cs.jpcc.6b11848</a>         |
| 286. | PBDTT-TVT   | ITIC      | 5.620  | 11.200 | 0.650 | 0.780 | <a href="https://doi.org/10.1021/a cs.jpcc.8b05184">https://doi.org/10.1021/a cs.jpcc.8b05184</a>         |
| 287. | PBDTT-FTVT  | ITIC      | 6.500  | 12.200 | 0.600 | 0.880 | <a href="https://doi.org/10.1021/a cs.jpcc.8b05184">https://doi.org/10.1021/a cs.jpcc.8b05184</a>         |
| 288. | P3HT        | IDTIDT-IC | 3.580  | 6.600  | 0.651 | 0.830 | <a href="https://doi.org/10.1016/j.powsour.2017.08.061">https://doi.org/10.1016/j.powsour.2017.08.061</a> |
| 289. | PBDTBDD     | IEICO     | 4.310  | 10.160 | 0.522 | 0.880 | <a href="https://doi.org/10.1002/m arc.201700492">https://doi.org/10.1002/m arc.201700492</a>             |

|      |          |            |        |        |       |       |                                                                                                         |
|------|----------|------------|--------|--------|-------|-------|---------------------------------------------------------------------------------------------------------|
| 290. | PDRCNBDT | ITIC       | 5.300  | 11.510 | 0.452 | 1.015 | <a href="https://doi.org/10.1002/marc.201700706">https://doi.org/10.1002/marc.201700706</a>             |
| 291. | PTPDBDT  | H-ITIC     | 6.400  | 10.600 | 0.580 | 1.040 | <a href="https://doi.org/10.1039/C7QM00025A">https://doi.org/10.1039/C7QM00025A</a>                     |
| 292. | PTPDBDT  | F-ITIC     | 8.800  | 14.100 | 0.660 | 0.940 | <a href="https://doi.org/10.1039/C7QM00025A">https://doi.org/10.1039/C7QM00025A</a>                     |
| 293. | PTPDBDT  | Cl-ITIC    | 9.500  | 15.600 | 0.650 | 0.940 | <a href="https://doi.org/10.1039/C7QM00025A">https://doi.org/10.1039/C7QM00025A</a>                     |
| 294. | PTPDBDT  | Br-ITIC    | 9.400  | 15.400 | 0.660 | 0.930 | <a href="https://doi.org/10.1039/C7QM00025A">https://doi.org/10.1039/C7QM00025A</a>                     |
| 295. | PTPDBDT  | I-ITIC     | 8.900  | 14.500 | 0.650 | 0.950 | <a href="https://doi.org/10.1039/C7QM00025A">https://doi.org/10.1039/C7QM00025A</a>                     |
| 296. | P3HT     | H1         | 5.420  | 7.740  | 0.600 | 1.170 | <a href="https://doi.org/10.1039/C7QM00084G">https://doi.org/10.1039/C7QM00084G</a>                     |
| 297. | FTAZ     | COi6IC     | 8.430  | 17.450 | 0.590 | 0.820 | <a href="https://doi.org/10.1039/C8QM00004B">https://doi.org/10.1039/C8QM00004B</a>                     |
| 298. | FTAZ     | COi6FIC    | 9.120  | 19.270 | 0.626 | 0.750 | <a href="https://doi.org/10.1039/C8QM00004B">https://doi.org/10.1039/C8QM00004B</a>                     |
| 299. | FTAZ     | COi6DFIC   | 8.250  | 20.390 | 0.589 | 0.670 | <a href="https://doi.org/10.1039/C8QM00004B">https://doi.org/10.1039/C8QM00004B</a>                     |
| 300. | FTAZ     | NNFA[0,6]  | 9.520  | 19.830 | 0.570 | 0.840 | <a href="https://doi.org/10.1039/C8QM00238J">https://doi.org/10.1039/C8QM00238J</a>                     |
| 301. | FTAZ     | NNFA[6,3]  | 7.560  | 14.720 | 0.591 | 0.870 | <a href="https://doi.org/10.1039/C8QM00238J">https://doi.org/10.1039/C8QM00238J</a>                     |
| 302. | FTAZ     | NNFA[6,6]  | 10.560 | 19.860 | 0.613 | 0.870 | <a href="https://doi.org/10.1039/C8QM00238J">https://doi.org/10.1039/C8QM00238J</a>                     |
| 303. | FTAZ     | NNFA[12,3] | 10.810 | 19.330 | 0.647 | 0.860 | <a href="https://doi.org/10.1039/C8QM00238J">https://doi.org/10.1039/C8QM00238J</a>                     |
| 304. | FTAZ     | NNFA[12,6] | 9.540  | 18.850 | 0.587 | 0.860 | <a href="https://doi.org/10.1039/C8QM00238J">https://doi.org/10.1039/C8QM00238J</a>                     |
| 305. | PBPD-Th  | ITIC       | 10.800 | 18.100 | 0.590 | 1.010 | <a href="https://doi.org/10.1016/j.nanoen.2017.07.047">https://doi.org/10.1016/j.nanoen.2017.07.047</a> |
| 306. | PBDB-T   | DTDP-IC    | 8.880  | 17.080 | 0.692 | 0.750 | <a href="https://doi.org/10.1016/j.nanoen.2017.12.030">https://doi.org/10.1016/j.nanoen.2017.12.030</a> |



|      |            |          |        |        |       |       |                                                                                                         |
|------|------------|----------|--------|--------|-------|-------|---------------------------------------------------------------------------------------------------------|
| 307. | PBDB-T     | DTDP-MIC | 9.390  | 16.820 | 0.700 | 0.800 | <a href="https://doi.org/10.1016/j.nanoen.2017.12.030">https://doi.org/10.1016/j.nanoen.2017.12.030</a> |
| 308. | P3HT       | O-IDTBR  | 6.300  | 13.900 | 0.600 | 0.720 | <a href="https://doi.org/10.1038/ncomms11585">https://doi.org/10.1038/ncomms11585</a>                   |
| 309. | P3HT       | EH-IDTBR | 6.000  | 12.100 | 0.620 | 0.760 | <a href="https://doi.org/10.1038/ncomms11585">https://doi.org/10.1038/ncomms11585</a>                   |
| 310. | PTFB-P     | ITIC     | 7.850  | 12.800 | 0.650 | 0.920 | <a href="https://doi.org/10.1038/ncomms13094">https://doi.org/10.1038/ncomms13094</a>                   |
| 311. | PTFB-O     | ITIC     | 10.130 | 15.500 | 0.700 | 0.920 | <a href="https://doi.org/10.1038/ncomms13094">https://doi.org/10.1038/ncomms13094</a>                   |
| 312. | PTFB-O     | ITIC-Th  | 10.880 | 17.100 | 0.670 | 0.920 | <a href="https://doi.org/10.1038/ncomms13094">https://doi.org/10.1038/ncomms13094</a>                   |
| 313. | J71        | ITIC     | 11.410 | 17.320 | 0.698 | 0.940 | <a href="https://doi.org/10.1038/ncomms13651">https://doi.org/10.1038/ncomms13651</a>                   |
| 314. | PBDTTT-EFT | EHIDTBR  | 12.000 | 18.500 | 0.630 | 1.030 | <a href="https://doi.org/10.1038/s41467-018-04502-3">https://doi.org/10.1038/s41467-018-04502-3</a>     |
| 315. | Ph00       | ITIC     | 7.420  | 15.920 | 0.548 | 0.850 | <a href="https://doi.org/10.1016/j.orgel.2018.03.005">https://doi.org/10.1016/j.orgel.2018.03.005</a>   |
| 316. | Ph100      | ITIC     | 7.620  | 15.230 | 0.556 | 0.900 | <a href="https://doi.org/10.1016/j.orgel.2018.03.005">https://doi.org/10.1016/j.orgel.2018.03.005</a>   |
| 317. | J71        | IDTNTC   | 8.520  | 14.160 | 0.638 | 0.942 | <a href="https://doi.org/10.1016/j.orgel.2018.07.018">https://doi.org/10.1016/j.orgel.2018.07.018</a>   |
| 318. | PDPP3T     | ITIC     | 1.900  | 4.200  | 0.590 | 0.780 | <a href="https://doi.org/10.1039/C7CP00494J">https://doi.org/10.1039/C7CP00494J</a>                     |
| 319. | PDPP4T     | ITIC     | 3.900  | 8.000  | 0.630 | 0.780 | <a href="https://doi.org/10.1039/C7CP00494J">https://doi.org/10.1039/C7CP00494J</a>                     |
| 320. | PDPP5T     | ITIC     | 4.100  | 9.600  | 0.610 | 0.690 | <a href="https://doi.org/10.1039/C7CP00494J">https://doi.org/10.1039/C7CP00494J</a>                     |
| 321. | PDPP6T     | ITIC     | 3.800  | 9.300  | 0.600 | 0.680 | <a href="https://doi.org/10.1039/C7CP00494J">https://doi.org/10.1039/C7CP00494J</a>                     |
| 322. | J40        | ITIC     | 6.480  | 12.180 | 0.601 | 0.890 | <a href="https://doi.org/10.1007/s11426-016-0173-y">https://doi.org/10.1007/s11426-016-0173-y</a>       |
| 323. | J61-F      | ITIC     | 8.240  | 13.120 | 0.661 | 0.950 | <a href="https://doi.org/10.1007/s11426-017-9030-9">https://doi.org/10.1007/s11426-017-9030-9</a>       |

|      |            |            |        |        |       |       |                                                                                                 |
|------|------------|------------|--------|--------|-------|-------|-------------------------------------------------------------------------------------------------|
| 324. | PBTIBDTT-S | ITIC-F     | 5.860  | 9.780  | 0.611 | 0.980 | <a href="https://doi.org/10.1002/sml.201704491">https://doi.org/10.1002/sml.201704491</a>       |
| 325. | PBTIBDTT-S | ITIC-F     | 9.120  | 14.400 | 0.657 | 0.960 | <a href="https://doi.org/10.1002/sml.201704491">https://doi.org/10.1002/sml.201704491</a>       |
| 326. | PBTIBDTT-S | ITIC-F     | 9.650  | 15.120 | 0.679 | 0.940 | <a href="https://doi.org/10.1002/sml.201704491">https://doi.org/10.1002/sml.201704491</a>       |
| 327. | PBTIBDTT-S | ITIC-F     | 10.550 | 16.330 | 0.687 | 0.940 | <a href="https://doi.org/10.1002/sml.201704491">https://doi.org/10.1002/sml.201704491</a>       |
| 328. | PBDB-T     | IDT-4CN    | 8.130  | 14.660 | 0.609 | 0.910 | <a href="https://doi.org/10.1002/smtd.201700330">https://doi.org/10.1002/smtd.201700330</a>     |
| 329. | PTB7-Th    | TIDT-BT-R2 | 8.700  | 13.100 | 0.639 | 1.040 | <a href="https://doi.org/10.1002/smtd.201700373">https://doi.org/10.1002/smtd.201700373</a>     |
| 330. | PTB7-Th    | TIDT-BT-R6 | 5.600  | 10.300 | 0.523 | 1.030 | <a href="https://doi.org/10.1002/smtd.201700373">https://doi.org/10.1002/smtd.201700373</a>     |
| 331. | PT5T       | ITIC-Th    | 0.370  | 1.390  | 0.327 | 0.813 | <a href="https://doi.org/10.1002/smtd.201700415">https://doi.org/10.1002/smtd.201700415</a>     |
| 332. | PT5T-2F    | ITIC-Th    | 9.690  | 16.640 | 0.708 | 0.822 | <a href="https://doi.org/10.1002/smtd.201700415">https://doi.org/10.1002/smtd.201700415</a>     |
| 333. | PJ1        | m-ITIC     | 6.410  | 11.100 | 0.560 | 1.031 | <a href="https://doi.org/10.1039/C8EE01546E">https://doi.org/10.1039/C8EE01546E</a>             |
| 334. | PJ1        | IDIC       | 6.180  | 12.000 | 0.536 | 0.958 | <a href="https://doi.org/10.1039/C8EE01546E">https://doi.org/10.1039/C8EE01546E</a>             |
| 335. | PJ2        | m-ITIC     | 10.340 | 16.800 | 0.623 | 0.988 | <a href="https://doi.org/10.1039/C8EE01546E">https://doi.org/10.1039/C8EE01546E</a>             |
| 336. | PJ2        | IDIC       | 12.010 | 17.000 | 0.753 | 0.939 | <a href="https://doi.org/10.1039/C8EE01546E">https://doi.org/10.1039/C8EE01546E</a>             |
| 337. | PJ2        | AIDIC      | 5.560  | 11.400 | 0.509 | 0.958 | <a href="https://doi.org/10.1039/C8EE01546E">https://doi.org/10.1039/C8EE01546E</a>             |
| 338. | PJ3        | m-ITIC     | 7.760  | 12.700 | 0.635 | 0.960 | <a href="https://doi.org/10.1039/C8EE01546E">https://doi.org/10.1039/C8EE01546E</a>             |
| 339. | PJ3        | IDIC       | 8.110  | 12.800 | 0.698 | 0.908 | <a href="https://doi.org/10.1039/C8EE01546E">https://doi.org/10.1039/C8EE01546E</a>             |
| 340. | PBDB-T     | ITBTR-C2   | 7.040  | 13.380 | 0.584 | 0.890 | <a href="https://doi.org/10.1021/acs.chem.8b00851">https://doi.org/10.1021/acs.chem.8b00851</a> |

|      |             |          |        |        |       |       |                                                                                               |
|------|-------------|----------|--------|--------|-------|-------|-----------------------------------------------------------------------------------------------|
| 341. | PBDB-T      | ITBTR-C4 | 7.430  | 14.750 | 0.542 | 0.900 | <a href="https://doi.org/10.1021/a CSAEM.8B00851">https://doi.org/10.1021/a CSAEM.8B00851</a> |
| 342. | PBDB-T      | ITBTR-C6 | 8.260  | 15.720 | 0.578 | 0.890 | <a href="https://doi.org/10.1021/a CSAEM.8B00851">https://doi.org/10.1021/a CSAEM.8B00851</a> |
| 343. | PBDB-T      | ITBTR-C8 | 7.930  | 14.740 | 0.585 | 0.900 | <a href="https://doi.org/10.1021/a CSAEM.8B00851">https://doi.org/10.1021/a CSAEM.8B00851</a> |
| 344. | PBDB-T      | ITBTR-C8 | 9.290  | 16.130 | 0.636 | 0.880 | <a href="https://doi.org/10.1021/a CSAEM.8B00851">https://doi.org/10.1021/a CSAEM.8B00851</a> |
| 345. | PTB7-Th     | FBRCN    | 3.300  | 7.800  | 0.310 | 0.998 | <a href="https://doi.org/10.1021/a CSAEM.8B01433">https://doi.org/10.1021/a CSAEM.8B01433</a> |
| 346. | PBT1Cl-Bz   | IT-4F    | 7.600  | 16.850 | 0.635 | 0.710 | <a href="https://doi.org/10.1021/a CSAEM.8B01447">https://doi.org/10.1021/a CSAEM.8B01447</a> |
| 347. | PBT2Clas-Bz | IT-4F    | 4.430  | 13.430 | 0.418 | 0.790 | <a href="https://doi.org/10.1021/a CSAEM.8B01447">https://doi.org/10.1021/a CSAEM.8B01447</a> |
| 348. | PBT2Cls-Bz  | IT-4F    | 7.800  | 15.550 | 0.652 | 0.770 | <a href="https://doi.org/10.1021/a CSAEM.8B01447">https://doi.org/10.1021/a CSAEM.8B01447</a> |
| 349. | PBT2Cls -Bz | IT-4F    | 9.250  | 16.420 | 0.587 | 0.960 | <a href="https://doi.org/10.1021/a CSAEM.8B01447">https://doi.org/10.1021/a CSAEM.8B01447</a> |
| 350. | FTAZ        | ITBC     | 4.170  | 11.890 | 0.490 | 0.716 | <a href="https://doi.org/10.1021/a CSAEM.8B01576">https://doi.org/10.1021/a CSAEM.8B01576</a> |
| 351. | PBDB-T      | ITIC     | 8.370  | 15.060 | 0.616 | 0.900 | <a href="https://doi.org/10.1021/a CSAEM.8B01320">https://doi.org/10.1021/a CSAEM.8B01320</a> |
| 352. | PTB7-Th     | ITIC     | 7.730  | 15.600 | 0.609 | 0.810 | <a href="https://doi.org/10.1021/a CSAEM.9B00611">https://doi.org/10.1021/a CSAEM.9B00611</a> |
| 353. | PBDB-T      | ITIC     | 10.640 | 18.330 | 0.671 | 0.860 | <a href="https://doi.org/10.1021/a CSAEM.9B00611">https://doi.org/10.1021/a CSAEM.9B00611</a> |
| 354. | P12         | ITIC     | 8.270  | 13.080 | 0.672 | 0.940 | <a href="https://doi.org/10.1021/a CSAEM.9B00365">https://doi.org/10.1021/a CSAEM.9B00365</a> |
| 355. | P19         | ITIC     | 10.020 | 15.160 | 0.701 | 0.943 | <a href="https://doi.org/10.1021/a CSAEM.9B00365">https://doi.org/10.1021/a CSAEM.9B00365</a> |
| 356. | P32         | ITIC     | 5.520  | 11.430 | 0.511 | 0.946 | <a href="https://doi.org/10.1021/a CSAEM.9B00365">https://doi.org/10.1021/a CSAEM.9B00365</a> |

|      |            |          |        |        |       |       |                                                                                                 |
|------|------------|----------|--------|--------|-------|-------|-------------------------------------------------------------------------------------------------|
| 357. | P3HT       | BT3      | 2.550  | 5.810  | 0.610 | 0.720 | <a href="https://doi.org/10.1021/a csami.8b103 12">https://doi.org/10.1021/a csami.8b103 12</a> |
| 358. | P3HT       | BTA3     | 5.670  | 9.860  | 0.650 | 0.900 | <a href="https://doi.org/10.1021/a csami.8b103 12">https://doi.org/10.1021/a csami.8b103 12</a> |
| 359. | PBDB-TF    | HF-PCIC  | 10.900 | 17.240 | 0.710 | 0.890 | <a href="https://doi.org/10.1021/a csami.8b161 31">https://doi.org/10.1021/a csami.8b161 31</a> |
| 360. | PBDB-TF    | HC-PCIC  | 11.480 | 17.540 | 0.727 | 0.880 | <a href="https://doi.org/10.1021/a csami.8b161 31">https://doi.org/10.1021/a csami.8b161 31</a> |
| 361. | PBDTTz-SBP | ITIC     | 12.090 | 18.520 | 0.714 | 0.914 | <a href="https://doi.org/10.1021/a csami.8b165 54">https://doi.org/10.1021/a csami.8b165 54</a> |
| 362. | PBDB-T     | IT-M     | 11.150 | 16.590 | 0.675 | 0.952 | <a href="https://doi.org/10.1021/a csami.8b172 46">https://doi.org/10.1021/a csami.8b172 46</a> |
| 363. | PT1        | ITIC     | 2.130  | 5.780  | 0.390 | 0.950 | <a href="https://doi.org/10.1021/a csami.8b166 28">https://doi.org/10.1021/a csami.8b166 28</a> |
| 364. | PT2        | ITIC     | 9.010  | 16.330 | 0.640 | 0.840 | <a href="https://doi.org/10.1021/a csami.8b166 28">https://doi.org/10.1021/a csami.8b166 28</a> |
| 365. | PT3        | ITIC     | 9.220  | 15.520 | 0.680 | 0.880 | <a href="https://doi.org/10.1021/a csami.8b166 28">https://doi.org/10.1021/a csami.8b166 28</a> |
| 366. | PBDB-T     | IDT-OB   | 10.120 | 15.910 | 0.700 | 0.880 | <a href="https://doi.org/10.1021/a csami.8b195 96">https://doi.org/10.1021/a csami.8b195 96</a> |
| 367. | PBDB-T     | IDTT-OB  | 11.190 | 16.410 | 0.740 | 0.910 | <a href="https://doi.org/10.1021/a csami.8b195 96">https://doi.org/10.1021/a csami.8b195 96</a> |
| 368. | PDTP-FBTA  | IT-M     | 8.380  | 16.190 | 0.681 | 0.760 | <a href="https://doi.org/10.1021/a csami.8b184 93">https://doi.org/10.1021/a csami.8b184 93</a> |
| 369. | PDTP-FBTA  | IT-M     | 10.510 | 17.150 | 0.753 | 0.810 | <a href="https://doi.org/10.1021/a csami.8b184 93">https://doi.org/10.1021/a csami.8b184 93</a> |
| 370. | PFBTBOX    | ITIC-4F  | 10.200 | 15.110 | 0.630 | 1.010 | <a href="https://doi.org/10.1021/a csami.8b202 76">https://doi.org/10.1021/a csami.8b202 76</a> |
| 371. | PBDB-T     | CPDT-4Cl | 9.280  | 21.300 | 0.668 | 0.650 | <a href="https://doi.org/10.1021/a csami.8b205 67">https://doi.org/10.1021/a csami.8b205 67</a> |
| 372. | PBDB-T     | CPDT-4F  | 9.470  | 20.100 | 0.696 | 0.680 | <a href="https://doi.org/10.1021/a csami.8b205 67">https://doi.org/10.1021/a csami.8b205 67</a> |

|      |                      |          |        |        |       |       |                                                                                                             |
|------|----------------------|----------|--------|--------|-------|-------|-------------------------------------------------------------------------------------------------------------|
| 373. | P[DTffBT-TbT(5)]-2OD | ITIC     | 6.800  | 14.200 | 0.487 | 0.985 | <a href="https://doi.org/10.1021/a csami.8b19449">https://doi.org/10.1021/a csami.8b19449</a>               |
| 374. | P[DTffBT-TbT(5)]-2OD | IDIC     | 8.500  | 17.500 | 0.537 | 0.899 | <a href="https://doi.org/10.1021/a csami.8b19449">https://doi.org/10.1021/a csami.8b19449</a>               |
| 375. | P[DTffBT-TbT(6)]-2OD | ITIC     | 6.900  | 13.000 | 0.592 | 0.899 | <a href="https://doi.org/10.1021/a csami.8b19449">https://doi.org/10.1021/a csami.8b19449</a>               |
| 376. | P[DTffBT-TbT(6)]-2OD | IDIC     | 6.800  | 12.900 | 0.682 | 0.778 | <a href="https://doi.org/10.1021/a csami.8b19449">https://doi.org/10.1021/a csami.8b19449</a>               |
| 377. | PTB7-Th              | ITIC     | 8.730  | 15.930 | 0.670 | 0.810 | <a href="https://doi.org/10.1021/a csami.9b03298">https://doi.org/10.1021/a csami.9b03298</a>               |
| 378. | PTB7-Th              | EH-IDTBR | 9.450  | 15.810 | 0.600 | 1.000 | <a href="https://doi.org/10.1021/a csami.9b03298">https://doi.org/10.1021/a csami.9b03298</a>               |
| 379. | PTB7-Th              | IEICO-4F | 11.880 | 26.360 | 0.620 | 0.720 | <a href="https://doi.org/10.1021/a csami.9b03298">https://doi.org/10.1021/a csami.9b03298</a>               |
| 380. | J52                  | IEICO    | 5.130  | 11.390 | 0.517 | 0.872 | <a href="https://doi.org/10.1021/a csami.9b03499">https://doi.org/10.1021/a csami.9b03499</a>               |
| 381. | J52                  | i-IEICO  | 10.480 | 18.760 | 0.582 | 0.960 | <a href="https://doi.org/10.1021/a csami.9b03499">https://doi.org/10.1021/a csami.9b03499</a>               |
| 382. | PBDB-T               | IEICO    | 3.380  | 7.160  | 0.528 | 0.894 | <a href="https://doi.org/10.1021/a csami.9b03499">https://doi.org/10.1021/a csami.9b03499</a>               |
| 383. | PBDB-T               | i-IEICO  | 8.790  | 14.670 | 0.596 | 1.006 | <a href="https://doi.org/10.1021/a csami.9b03499">https://doi.org/10.1021/a csami.9b03499</a>               |
| 384. | TP                   | ITIC     | 8.180  | 15.310 | 0.600 | 0.890 | <a href="https://doi.org/10.1021/a csaem.9b00520">https://doi.org/10.1021/a csaem.9b00520</a>               |
| 385. | TP                   | IEICO-4F | 8.730  | 21.440 | 0.550 | 0.740 | <a href="https://doi.org/10.1021/a csaem.9b00520">https://doi.org/10.1021/a csaem.9b00520</a>               |
| 386. | PTB7-Th              | IEICO-4F | 10.200 | 21.300 | 0.680 | 0.710 | <a href="https://doi.org/10.1021/a csenergylett.8b01448">https://doi.org/10.1021/a csenergylett.8b01448</a> |
| 387. | PM6                  | SeTIC    | 7.460  | 15.450 | 0.510 | 0.950 | <a href="https://doi.org/10.1021/a csenergylett.8b01808">https://doi.org/10.1021/a csenergylett.8b01808</a> |
| 388. | PM6                  | SeTIC4Cl | 13.320 | 22.920 | 0.750 | 0.780 | <a href="https://doi.org/10.1021/a csenergylett.8b01808">https://doi.org/10.1021/a csenergylett.8b01808</a> |

|      |              |          |        |        |       |       |                                                                                                               |
|------|--------------|----------|--------|--------|-------|-------|---------------------------------------------------------------------------------------------------------------|
| 389. | PBDB-T       | IPIC     | 3.980  | 7.160  | 0.586 | 0.950 | <a href="https://doi.org/10.1021/a csenergylett. 9b00147">https://doi.org/10.1021/a csenergylett. 9b00147</a> |
| 390. | PBDB-T       | IPIC-4F  | 11.100 | 19.800 | 0.671 | 0.835 | <a href="https://doi.org/10.1021/a csenergylett. 9b00147">https://doi.org/10.1021/a csenergylett. 9b00147</a> |
| 391. | PBDB-T       | IPIC-4CI | 13.400 | 22.200 | 0.740 | 0.813 | <a href="https://doi.org/10.1021/a csenergylett. 9b00147">https://doi.org/10.1021/a csenergylett. 9b00147</a> |
| 392. | PTB7-Th      | FOIC     | 11.900 | 22.500 | 0.703 | 0.740 | <a href="https://doi.org/10.1021/a csenergylett. 9b00681">https://doi.org/10.1021/a csenergylett. 9b00681</a> |
| 393. | PTB7-Th      | CTIC-4F  | 10.500 | 23.400 | 0.640 | 0.700 | <a href="https://doi.org/10.1021/a csenergylett. 9b00721">https://doi.org/10.1021/a csenergylett. 9b00721</a> |
| 394. | PTB7-Th      | CO1-4F   | 10.200 | 24.800 | 0.640 | 0.640 | <a href="https://doi.org/10.1021/a csenergylett. 9b00721">https://doi.org/10.1021/a csenergylett. 9b00721</a> |
| 395. | PTB7-Th      | COTIC-4F | 7.300  | 20.700 | 0.610 | 0.570 | <a href="https://doi.org/10.1021/a csenergylett. 9b00721">https://doi.org/10.1021/a csenergylett. 9b00721</a> |
| 396. | PBDB-T       | O-IDTBR  | 8.090  | 13.640 | 0.587 | 1.010 | <a href="https://doi.org/10.1021/a csomega.8b 01925">https://doi.org/10.1021/a csomega.8b 01925</a>           |
| 397. | PfBTAZT-BDT  | ITIC     | 6.040  | 14.200 | 0.575 | 0.740 | <a href="https://doi.org/10.1021/a csomega.8b 02053">https://doi.org/10.1021/a csomega.8b 02053</a>           |
| 398. | PfBTAZT-fBDT | ITIC     | 6.590  | 13.940 | 0.618 | 0.770 | <a href="https://doi.org/10.1021/a csomega.8b 02053">https://doi.org/10.1021/a csomega.8b 02053</a>           |
| 399. | PE61         | Y6       | 8.610  | 23.410 | 0.553 | 0.660 | <a href="https://doi.org/10.1021/a csmacrolett. 9b00368">https://doi.org/10.1021/a csmacrolett. 9b00368</a>   |
| 400. | PE62         | Y6       | 12.020 | 24.640 | 0.622 | 0.780 | <a href="https://doi.org/10.1021/a csmacrolett. 9b00368">https://doi.org/10.1021/a csmacrolett. 9b00368</a>   |
| 401. | PE63         | Y6       | 13.100 | 24.680 | 0.637 | 0.830 | <a href="https://doi.org/10.1021/a csmacrolett. 9b00368">https://doi.org/10.1021/a csmacrolett. 9b00368</a>   |
| 402. | PBDB-T       | ITCT-DM  | 10.560 | 17.400 | 0.650 | 0.904 | <a href="https://doi.org/10.1002/a enm.201800 204">https://doi.org/10.1002/a enm.201800 204</a>               |
| 403. | PTB7-Th      | IEICS-4F | 7.500  | 16.970 | 0.580 | 0.720 | <a href="https://doi.org/10.1002/a enm.201800 529">https://doi.org/10.1002/a enm.201800 529</a>               |
| 404. | PTB7-Th      | COi8DFIC | 11.470 | 23.450 | 0.689 | 0.710 | <a href="https://doi.org/10.1002/a enm.201801 968">https://doi.org/10.1002/a enm.201801 968</a>               |

|      |           |            |        |        |       |       |                                                                                             |
|------|-----------|------------|--------|--------|-------|-------|---------------------------------------------------------------------------------------------|
| 405. | PTB7-Th   | BDTThIT-4F | 9.250  | 17.520 | 0.708 | 0.746 | <a href="https://doi.org/10.1002/aenm.201801968">https://doi.org/10.1002/aenm.201801968</a> |
| 406. | PBDB-TF   | ITIC       | 10.300 | 15.600 | 0.660 | 1.010 | <a href="https://doi.org/10.1002/aenm.201802131">https://doi.org/10.1002/aenm.201802131</a> |
| 407. | PBDB-TF   | ITEN       | 10.900 | 16.500 | 0.670 | 0.989 | <a href="https://doi.org/10.1002/aenm.201802131">https://doi.org/10.1002/aenm.201802131</a> |
| 408. | PBDB-TF   | ITPN       | 12.600 | 17.500 | 0.730 | 0.986 | <a href="https://doi.org/10.1002/aenm.201802131">https://doi.org/10.1002/aenm.201802131</a> |
| 409. | PBDB-T-2F | TfIF-IC    | 5.900  | 10.800 | 0.540 | 1.010 | <a href="https://doi.org/10.1002/aenm.201803657">https://doi.org/10.1002/aenm.201803657</a> |
| 410. | PBDB-T-2F | TfIF-4FIC  | 13.100 | 17.600 | 0.760 | 0.980 | <a href="https://doi.org/10.1002/aenm.201803657">https://doi.org/10.1002/aenm.201803657</a> |
| 411. | PTBB-o    | ITCPTC     | 3.090  | 8.430  | 0.366 | 1.000 | <a href="https://doi.org/10.1002/aenm.201802686">https://doi.org/10.1002/aenm.201802686</a> |
| 412. | PTBB-m    | ITCPTC     | 12.220 | 18.110 | 0.702 | 0.960 | <a href="https://doi.org/10.1002/aenm.201802686">https://doi.org/10.1002/aenm.201802686</a> |
| 413. | PTBB-p    | ITCPTC     | 9.360  | 15.760 | 0.652 | 0.910 | <a href="https://doi.org/10.1002/aenm.201802686">https://doi.org/10.1002/aenm.201802686</a> |
| 414. | P3HT      | ERCN       | 2.640  | 5.870  | 0.560 | 0.900 | <a href="https://doi.org/10.1002/aenm.201803012">https://doi.org/10.1002/aenm.201803012</a> |
| 415. | P3HT      | ORCN       | 6.400  | 11.500 | 0.623 | 0.870 | <a href="https://doi.org/10.1002/aenm.201803012">https://doi.org/10.1002/aenm.201803012</a> |
| 416. | J52       | IEICO-4F   | 9.210  | 22.270 | 0.613 | 0.675 | <a href="https://doi.org/10.1002/aenm.201803438">https://doi.org/10.1002/aenm.201803438</a> |
| 417. | PBDB-T    | AT-NC      | 10.910 | 17.110 | 0.694 | 0.919 | <a href="https://doi.org/10.1002/aenm.201803541">https://doi.org/10.1002/aenm.201803541</a> |
| 418. | PBDB-TF   | AT-4CI     | 13.270 | 19.520 | 0.755 | 0.901 | <a href="https://doi.org/10.1002/aenm.201803541">https://doi.org/10.1002/aenm.201803541</a> |
| 419. | PTB7-Th   | T2-ORH     | 9.330  | 14.720 | 0.590 | 1.070 | <a href="https://doi.org/10.1002/aenm.201804021">https://doi.org/10.1002/aenm.201804021</a> |
| 420. | PM6       | ITCPTC     | 12.300 | 17.600 | 0.734 | 0.950 | <a href="https://doi.org/10.1002/aenm.201900041">https://doi.org/10.1002/aenm.201900041</a> |

|      |        |             |        |        |       |       |                                                                                             |
|------|--------|-------------|--------|--------|-------|-------|---------------------------------------------------------------------------------------------|
| 421. | PM6    | ITC-2C1     | 13.600 | 20.100 | 0.741 | 0.910 | <a href="https://doi.org/10.1002/aenm.201900041">https://doi.org/10.1002/aenm.201900041</a> |
| 422. | PBDB-T | m-ITIC-H    | 8.540  | 15.090 | 0.670 | 0.850 | <a href="https://doi.org/10.1002/aenm.201900044">https://doi.org/10.1002/aenm.201900044</a> |
| 423. | PBDB-T | m-ITIC-O-H  | 9.550  | 15.990 | 0.700 | 0.850 | <a href="https://doi.org/10.1002/aenm.201900044">https://doi.org/10.1002/aenm.201900044</a> |
| 424. | PBDB-T | m-ITIC-O-EH | 9.770  | 15.880 | 0.680 | 0.880 | <a href="https://doi.org/10.1002/aenm.201900044">https://doi.org/10.1002/aenm.201900044</a> |
| 425. | PBDB-T | DTN-IC-2Ph  | 5.450  | 9.330  | 0.600 | 0.974 | <a href="https://doi.org/10.1002/aenm.201803976">https://doi.org/10.1002/aenm.201803976</a> |
| 426. | PBDB-T | DTA-IC-3Ph  | 6.090  | 12.270 | 0.529 | 0.938 | <a href="https://doi.org/10.1002/aenm.201803976">https://doi.org/10.1002/aenm.201803976</a> |
| 427. | PBDB-T | DTP-IC-4Ph  | 10.370 | 17.320 | 0.666 | 0.900 | <a href="https://doi.org/10.1002/aenm.201803976">https://doi.org/10.1002/aenm.201803976</a> |
| 428. | PBDB-T | IDTIC       | 5.670  | 12.700 | 0.563 | 0.840 | <a href="https://doi.org/10.1002/afm.201802895">https://doi.org/10.1002/afm.201802895</a>   |
| 429. | PBDB-T | IDTTIC      | 11.200 | 17.300 | 0.704 | 0.919 | <a href="https://doi.org/10.1002/afm.201802895">https://doi.org/10.1002/afm.201802895</a>   |
| 430. | PBDB-T | BTTIC       | 13.180 | 19.520 | 0.747 | 0.904 | <a href="https://doi.org/10.1002/afm.201803128">https://doi.org/10.1002/afm.201803128</a>   |
| 431. | PBDB-T | BTOIC       | 10.960 | 18.600 | 0.684 | 0.862 | <a href="https://doi.org/10.1002/afm.201803128">https://doi.org/10.1002/afm.201803128</a>   |
| 432. | PBDB-T | ITIC        | 9.220  | 15.200 | 0.670 | 0.861 | <a href="https://doi.org/10.1002/afm.201805872">https://doi.org/10.1002/afm.201805872</a>   |
| 433. | PBDB-T | ITIF        | 2.850  | 7.780  | 0.382 | 0.958 | <a href="https://doi.org/10.1002/afm.201805872">https://doi.org/10.1002/afm.201805872</a>   |
| 434. | PBDB-T | INPIC-4F    | 13.100 | 21.800 | 0.732 | 0.820 | <a href="https://doi.org/10.1002/afm.201807662">https://doi.org/10.1002/afm.201807662</a>   |
| 435. | L24    | IT-4F       | 1.330  | 7.410  | 0.363 | 0.741 | <a href="https://doi.org/10.1002/afm.201808828">https://doi.org/10.1002/afm.201808828</a>   |
| 436. | L68    | IT-4F       | 9.300  | 19.500 | 0.632 | 0.758 | <a href="https://doi.org/10.1002/afm.201808828">https://doi.org/10.1002/afm.201808828</a>   |



|      |            |          |        |        |       |       |                                                                                             |
|------|------------|----------|--------|--------|-------|-------|---------------------------------------------------------------------------------------------|
| 437. | L810       | IT-4F    | 12.100 | 20.760 | 0.735 | 0.790 | <a href="https://doi.org/10.1002/afdm.201808828">https://doi.org/10.1002/afdm.201808828</a> |
| 438. | FTAZ       | IDIC     | 10.400 | 16.600 | 0.710 | 0.850 | <a href="https://doi.org/10.1002/adma.201801501">https://doi.org/10.1002/adma.201801501</a> |
| 439. | PTB7-Th    | T1       | 9.820  | 20.950 | 0.650 | 0.720 | <a href="https://doi.org/10.1002/adma.201803769">https://doi.org/10.1002/adma.201803769</a> |
| 440. | PTB7-Th    | T3       | 9.430  | 22.000 | 0.700 | 0.610 | <a href="https://doi.org/10.1002/adma.201803769">https://doi.org/10.1002/adma.201803769</a> |
| 441. | PTB7-Th    | T4       | 7.010  | 18.570 | 0.620 | 0.610 | <a href="https://doi.org/10.1002/adma.201803769">https://doi.org/10.1002/adma.201803769</a> |
| 442. | PTB7-Th    | T2       | 10.870 | 24.850 | 0.670 | 0.650 | <a href="https://doi.org/10.1002/adma.201803769">https://doi.org/10.1002/adma.201803769</a> |
| 443. | PffBT2T-TT | O-IDTBR  | 10.400 | 14.730 | 0.640 | 1.080 | <a href="https://doi.org/10.1002/adma.201804215">https://doi.org/10.1002/adma.201804215</a> |
| 444. | J61        | Y5       | 11.000 | 21.100 | 0.583 | 0.900 | <a href="https://doi.org/10.1002/adma.201807577">https://doi.org/10.1002/adma.201807577</a> |
| 445. | TTFQz-T1   | Y5       | 13.100 | 21.200 | 0.696 | 0.890 | <a href="https://doi.org/10.1002/adma.201807577">https://doi.org/10.1002/adma.201807577</a> |
| 446. | PBDB-T     | Y5       | 14.100 | 22.800 | 0.702 | 0.880 | <a href="https://doi.org/10.1002/adma.201807577">https://doi.org/10.1002/adma.201807577</a> |
| 447. | FTAZ       | IT-M     | 11.800 | 17.200 | 0.679 | 0.960 | <a href="https://doi.org/10.1002/adma.201808279">https://doi.org/10.1002/adma.201808279</a> |
| 448. | PBDB-T     | IT-M     | 7.200  | 13.500 | 0.528 | 0.940 | <a href="https://doi.org/10.1002/adma.201808279">https://doi.org/10.1002/adma.201808279</a> |
| 449. | Pt-PSFTZ   | Y6       | 13.030 | 25.100 | 0.649 | 0.800 | <a href="https://doi.org/10.1002/adma.201901872">https://doi.org/10.1002/adma.201901872</a> |
| 450. | PBDB-T     | HF-PCIC  | 8.820  | 16.260 | 0.684 | 0.800 | <a href="https://doi.org/10.1002/advs.201800755">https://doi.org/10.1002/advs.201800755</a> |
| 451. | PBDB-T     | IEICO-4F | 6.640  | 19.430 | 0.446 | 0.740 | <a href="https://doi.org/10.1002/advs.201800755">https://doi.org/10.1002/advs.201800755</a> |
| 452. | PBDB-T-2F  | IT-4F    | 12.300 | 21.610 | 0.692 | 0.830 | <a href="https://doi.org/10.1002/advs.201801180">https://doi.org/10.1002/advs.201801180</a> |

|      |            |         |        |        |       |       |                                                                                                           |
|------|------------|---------|--------|--------|-------|-------|-----------------------------------------------------------------------------------------------------------|
| 453. | PhI-ffBT   | IT-4F   | 13.310 | 19.410 | 0.760 | 0.910 | <a href="https://doi.org/10.1002/adv.201801743">https://doi.org/10.1002/adv.201801743</a>                 |
| 454. | ffPhI-ffBT | IT-4F   | 12.740 | 19.010 | 0.710 | 0.940 | <a href="https://doi.org/10.1002/adv.201801743">https://doi.org/10.1002/adv.201801743</a>                 |
| 455. | PBBF11     | ITIC    | 10.020 | 17.580 | 0.619 | 0.910 | <a href="https://doi.org/10.1002/adv.201802103">https://doi.org/10.1002/adv.201802103</a>                 |
| 456. | PBDB-T     | BTTFIC  | 9.000  | 17.520 | 0.539 | 0.930 | <a href="https://doi.org/10.1002/as.201801669">https://doi.org/10.1002/as.201801669</a>                   |
| 457. | PTB7-Th    | BTTFIC  | 8.470  | 17.220 | 0.540 | 0.869 | <a href="https://doi.org/10.1002/as.201801669">https://doi.org/10.1002/as.201801669</a>                   |
| 458. | PTB7-Th    | Py-1    | 6.030  | 12.090 | 0.650 | 0.740 | <a href="https://doi.org/10.1002/chem.201900296">https://doi.org/10.1002/chem.201900296</a>               |
| 459. | PTB7-Th    | FPIC    | 8.450  | 15.300 | 0.731 | 0.755 | <a href="https://doi.org/10.1021/acs.chemmater.8b04668">https://doi.org/10.1021/acs.chemmater.8b04668</a> |
| 460. | PTB7-Th    | F8IC    | 9.550  | 23.300 | 0.634 | 0.645 | <a href="https://doi.org/10.1021/acs.chemmater.8b04668">https://doi.org/10.1021/acs.chemmater.8b04668</a> |
| 461. | PBB-T      | ITIC-F  | 11.300 | 19.700 | 0.620 | 0.920 | <a href="https://doi.org/10.1021/acs.chemmater.8b04265">https://doi.org/10.1021/acs.chemmater.8b04265</a> |
| 462. | PBDB-T     | R10-4Cl | 10.700 | 18.900 | 0.666 | 0.850 | <a href="https://doi.org/10.1021/acs.chemmater.8b05047">https://doi.org/10.1021/acs.chemmater.8b05047</a> |
| 463. | PBDB-T     | R12-4Cl | 9.300  | 18.500 | 0.669 | 0.750 | <a href="https://doi.org/10.1021/acs.chemmater.8b05047">https://doi.org/10.1021/acs.chemmater.8b05047</a> |
| 464. | J52        | BTA3    | 9.410  | 14.620 | 0.603 | 1.070 | <a href="https://doi.org/10.1021/acs.chemmater.8b05316">https://doi.org/10.1021/acs.chemmater.8b05316</a> |
| 465. | J52-Cl     | BTA3    | 10.500 | 13.160 | 0.666 | 1.240 | <a href="https://doi.org/10.1021/acs.chemmater.8b05316">https://doi.org/10.1021/acs.chemmater.8b05316</a> |
| 466. | PBDB-T     | IE4F-S  | 13.720 | 22.880 | 0.691 | 0.868 | <a href="https://doi.org/10.1021/acs.chemmater.9b01175">https://doi.org/10.1021/acs.chemmater.9b01175</a> |
| 467. | PTQ10      | IE4F-S  | 12.200 | 19.670 | 0.623 | 0.996 | <a href="https://doi.org/10.1021/acs.chemmater.9b01175">https://doi.org/10.1021/acs.chemmater.9b01175</a> |
| 468. | PBDTT-FTTE | ITIC-Th | 8.020  | 14.800 | 0.642 | 0.805 | <a href="https://doi.org/10.1021/acs.chemmater.9b01741">https://doi.org/10.1021/acs.chemmater.9b01741</a> |

|      |             |          |        |        |       |       |                                                                                                           |
|------|-------------|----------|--------|--------|-------|-------|-----------------------------------------------------------------------------------------------------------|
| 469. | PBDTSe-FTTE | ITIC-Th  | 7.420  | 15.600 | 0.594 | 0.785 | <a href="https://doi.org/10.1021/acs.chemmater.9b01741">https://doi.org/10.1021/acs.chemmater.9b01741</a> |
| 470. | PBDTTS-FTTE | ITIC-Th  | 5.950  | 12.100 | 0.534 | 0.860 | <a href="https://doi.org/10.1021/acs.chemmater.9b01741">https://doi.org/10.1021/acs.chemmater.9b01741</a> |
| 471. | PBDTTF-FTTE | ITIC-Th  | 7.900  | 13.100 | 0.571 | 0.995 | <a href="https://doi.org/10.1021/acs.chemmater.9b01741">https://doi.org/10.1021/acs.chemmater.9b01741</a> |
| 472. | PBDB-T      | ITIC     | 10.820 | 16.640 | 0.712 | 0.900 | <a href="https://doi.org/10.1039/C8EE01564C">https://doi.org/10.1039/C8EE01564C</a>                       |
| 473. | PBDB-T      | IT-M     | 11.710 | 17.170 | 0.715 | 0.940 | <a href="https://doi.org/10.1039/C8EE01564C">https://doi.org/10.1039/C8EE01564C</a>                       |
| 474. | PM7         | ITC-2C1  | 13.720 | 20.270 | 0.739 | 0.915 | <a href="https://doi.org/10.1039/C9EE01030K">https://doi.org/10.1039/C9EE01030K</a>                       |
| 475. | PM7         | IXIC-4C1 | 12.010 | 21.600 | 0.699 | 0.795 | <a href="https://doi.org/10.1039/C9EE01030K">https://doi.org/10.1039/C9EE01030K</a>                       |
| 476. | PBN-S       | IT-4F    | 13.100 | 21.030 | 0.699 | 0.891 | <a href="https://doi.org/10.1039/C8EE03608J">https://doi.org/10.1039/C8EE03608J</a>                       |
| 477. | PBDTS-TZNT  | ITIC     | 10.450 | 16.920 | 0.657 | 0.940 | <a href="https://doi.org/10.1016/j.isci.2018.12.027">https://doi.org/10.1016/j.isci.2018.12.027</a>       |
| 478. | PBDTS-TZNT  | IT-4F    | 11.310 | 18.650 | 0.689 | 0.880 | <a href="https://doi.org/10.1016/j.isci.2018.12.027">https://doi.org/10.1016/j.isci.2018.12.027</a>       |
| 479. | PBDTS-TZNT  | ITIC     | 12.160 | 17.580 | 0.706 | 0.980 | <a href="https://doi.org/10.1016/j.isci.2018.12.027">https://doi.org/10.1016/j.isci.2018.12.027</a>       |
| 480. | PBDTS-TZNT  | IT-4F    | 13.250 | 19.230 | 0.741 | 0.930 | <a href="https://doi.org/10.1016/j.isci.2018.12.027">https://doi.org/10.1016/j.isci.2018.12.027</a>       |
| 481. | PT4FB       | IDIC     | 9.810  | 13.720 | 0.710 | 0.970 | <a href="https://doi.org/10.1039/C8TA08769E">https://doi.org/10.1039/C8TA08769E</a>                       |
| 482. | PTT4FB      | IDIC     | 10.600 | 16.240 | 0.670 | 0.960 | <a href="https://doi.org/10.1039/C8TA08769E">https://doi.org/10.1039/C8TA08769E</a>                       |
| 483. | PTB7-Th     | F8IC     | 10.300 | 24.600 | 0.649 | 0.646 | <a href="https://doi.org/10.1039/C8TA09042D">https://doi.org/10.1039/C8TA09042D</a>                       |
| 484. | PTB7-Th     | IDT-2BR  | 7.310  | 12.900 | 0.543 | 1.050 | <a href="https://doi.org/10.1039/C8TA09042D">https://doi.org/10.1039/C8TA09042D</a>                       |
| 485. | J71         | TTz1     | 8.770  | 15.430 | 0.632 | 0.900 | <a href="https://doi.org/10.1039/C8TA09370A">https://doi.org/10.1039/C8TA09370A</a>                       |

|      |           |              |        |        |       |       |                                                                                     |
|------|-----------|--------------|--------|--------|-------|-------|-------------------------------------------------------------------------------------|
| 486. | J71       | TTz2         | 6.300  | 12.750 | 0.537 | 0.920 | <a href="https://doi.org/10.1039/C8TA09370A">https://doi.org/10.1039/C8TA09370A</a> |
| 487. | PTB7-Th   | ACS8         | 13.200 | 25.300 | 0.693 | 0.750 | <a href="https://doi.org/10.1039/C8TA11484F">https://doi.org/10.1039/C8TA11484F</a> |
| 488. | PTB7-Th   | FOIC         | 12.100 | 24.730 | 0.678 | 0.722 | <a href="https://doi.org/10.1039/C8TA11637G">https://doi.org/10.1039/C8TA11637G</a> |
| 489. | PTB7-Th   | m-IDTIDT-FIC | 8.270  | 15.680 | 0.663 | 0.800 | <a href="https://doi.org/10.1039/C8TA11972D">https://doi.org/10.1039/C8TA11972D</a> |
| 490. | J71       | m-IDTIDT-FIC | 11.320 | 18.010 | 0.683 | 0.920 | <a href="https://doi.org/10.1039/C8TA11972D">https://doi.org/10.1039/C8TA11972D</a> |
| 491. | PBDB-T    | BTTIC-0M     | 11.870 | 18.950 | 0.729 | 0.860 | <a href="https://doi.org/10.1039/C9TA00597H">https://doi.org/10.1039/C9TA00597H</a> |
| 492. | PBDB-T    | BTTIC-2M     | 13.150 | 19.390 | 0.753 | 0.900 | <a href="https://doi.org/10.1039/C9TA00597H">https://doi.org/10.1039/C9TA00597H</a> |
| 493. | PBDB-T    | BTTIC-4M     | 9.600  | 15.670 | 0.637 | 0.968 | <a href="https://doi.org/10.1039/C9TA00597H">https://doi.org/10.1039/C9TA00597H</a> |
| 494. | PBDB-T    | ITIC-m       | 9.550  | 15.790 | 0.630 | 0.930 | <a href="https://doi.org/10.1039/C9TA00468H">https://doi.org/10.1039/C9TA00468H</a> |
| 495. | PBDB-T    | a-IT-2OM     | 12.070 | 18.110 | 0.715 | 0.930 | <a href="https://doi.org/10.1039/C8TA12530A">https://doi.org/10.1039/C8TA12530A</a> |
| 496. | PBDB-T    | a-IT-2F      | 10.280 | 19.060 | 0.688 | 0.780 | <a href="https://doi.org/10.1039/C8TA12530A">https://doi.org/10.1039/C8TA12530A</a> |
| 497. | PBDB-T    | ITIC         | 9.530  | 17.240 | 0.633 | 0.870 | <a href="https://doi.org/10.1039/C8TA12530A">https://doi.org/10.1039/C8TA12530A</a> |
| 498. | PBDB-T    | DBTTC        | 11.250 | 17.250 | 0.670 | 0.972 | <a href="https://doi.org/10.1039/C9TA02544H">https://doi.org/10.1039/C9TA02544H</a> |
| 499. | PBDB-T    | DBTIC        | 9.660  | 15.480 | 0.622 | 1.004 | <a href="https://doi.org/10.1039/C9TA02544H">https://doi.org/10.1039/C9TA02544H</a> |
| 500. | PBDB-T    | DBTIC-2F     | 6.810  | 15.160 | 0.563 | 0.799 | <a href="https://doi.org/10.1039/C9TA02544H">https://doi.org/10.1039/C9TA02544H</a> |
| 501. | PBDB-T-SF | IDIC         | 9.390  | 15.290 | 0.627 | 0.980 | <a href="https://doi.org/10.1039/C9TA01003C">https://doi.org/10.1039/C9TA01003C</a> |
| 502. | PBDB-T-SF | ID4F         | 10.350 | 17.420 | 0.725 | 0.820 | <a href="https://doi.org/10.1039/C9TA01003C">https://doi.org/10.1039/C9TA01003C</a> |
| 503. | PBDB-T    | ITBTC        | 10.990 | 16.370 | 0.713 | 0.941 | <a href="https://doi.org/10.1039/C9TA01111K">https://doi.org/10.1039/C9TA01111K</a> |

|      |                         |                       |        |        |       |       |                                                                                     |
|------|-------------------------|-----------------------|--------|--------|-------|-------|-------------------------------------------------------------------------------------|
| 504. | PBDB-T                  | ITIC                  | 9.530  | 16.130 | 0.658 | 0.897 | <a href="https://doi.org/10.1039/C9TA01111K">https://doi.org/10.1039/C9TA01111K</a> |
| 505. | PTAZ-CH                 | ITIC                  | 11.350 | 18.200 | 0.700 | 0.890 | <a href="https://doi.org/10.1039/C9TA02384D">https://doi.org/10.1039/C9TA02384D</a> |
| 506. | PTAZ-CH-S               | ITIC                  | 12.150 | 17.610 | 0.732 | 0.940 | <a href="https://doi.org/10.1039/C9TA02384D">https://doi.org/10.1039/C9TA02384D</a> |
| 507. | PM6                     | BTT-MIC               | 10.040 | 15.900 | 0.615 | 1.027 | <a href="https://doi.org/10.1039/C9TA01888C">https://doi.org/10.1039/C9TA01888C</a> |
| 508. | PM6                     | BTT-FIC               | 12.650 | 18.540 | 0.716 | 0.953 | <a href="https://doi.org/10.1039/C9TA01888C">https://doi.org/10.1039/C9TA01888C</a> |
| 509. | PBDB-T                  | BTTIC                 | 12.860 | 19.450 | 0.738 | 0.895 | <a href="https://doi.org/10.1039/C9TA02283J">https://doi.org/10.1039/C9TA02283J</a> |
| 510. | PBDB-T                  | a-BTTIC               | 13.600 | 20.310 | 0.740 | 0.904 | <a href="https://doi.org/10.1039/C9TA02283J">https://doi.org/10.1039/C9TA02283J</a> |
| 511. | PBDB-T                  | ITIC                  | 9.670  | 16.460 | 0.660 | 0.890 | <a href="https://doi.org/10.1039/C9TA01195A">https://doi.org/10.1039/C9TA01195A</a> |
| 512. | PM7                     | BDS <sub>e</sub> ThCl | 11.910 | 17.850 | 0.688 | 0.970 | <a href="https://doi.org/10.1039/C9TA03177D">https://doi.org/10.1039/C9TA03177D</a> |
| 513. | PM7                     | BDS <sub>e</sub> PhCl | 13.680 | 20.350 | 0.731 | 0.920 | <a href="https://doi.org/10.1039/C9TA03177D">https://doi.org/10.1039/C9TA03177D</a> |
| 514. | PBDB-T                  | ITIC-CI <sub>4</sub>  | 9.600  | 21.500 | 0.570 | 0.740 | <a href="https://doi.org/10.1039/C8TC02701C">https://doi.org/10.1039/C8TC02701C</a> |
| 515. | PBTIBD <sub>TT</sub>    | Si <sub>4</sub> TIC-F | 10.200 | 18.840 | 0.694 | 0.780 | <a href="https://doi.org/10.1039/C8TC04883E">https://doi.org/10.1039/C8TC04883E</a> |
| 516. | P4T2F-BO                | O-IDTBR               | 6.300  | 9.900  | 0.600 | 1.060 | <a href="https://doi.org/10.1039/C8TC04746D">https://doi.org/10.1039/C8TC04746D</a> |
| 517. | P4T2F-BO/HD             | O-IDTBR               | 6.500  | 10.700 | 0.600 | 1.020 | <a href="https://doi.org/10.1039/C8TC04746D">https://doi.org/10.1039/C8TC04746D</a> |
| 518. | P4T2F-HD                | O-IDTBR               | 7.000  | 10.000 | 0.670 | 1.040 | <a href="https://doi.org/10.1039/C8TC04746D">https://doi.org/10.1039/C8TC04746D</a> |
| 519. | PDFQ <sub>x</sub> -2T   | ITIC                  | 4.820  | 12.230 | 0.420 | 0.860 | <a href="https://doi.org/10.1039/C8TC06206D">https://doi.org/10.1039/C8TC06206D</a> |
| 520. | PDFQ <sub>x</sub> -2T2F | ITIC                  | 4.930  | 10.340 | 0.470 | 0.970 | <a href="https://doi.org/10.1039/C8TC06206D">https://doi.org/10.1039/C8TC06206D</a> |
| 521. | PDFQ <sub>x</sub> -2TB  | ITIC                  | 3.950  | 9.030  | 0.450 | 0.930 | <a href="https://doi.org/10.1039/C8TC06206D">https://doi.org/10.1039/C8TC06206D</a> |

|      |              |           |        |        |       |       |                                                                                                           |
|------|--------------|-----------|--------|--------|-------|-------|-----------------------------------------------------------------------------------------------------------|
| 522. | PDFQx-3T     | ITIC      | 8.130  | 16.600 | 0.580 | 0.820 | <a href="https://doi.org/10.1039/C8TC06206D">https://doi.org/10.1039/C8TC06206D</a>                       |
| 523. | PBDB-T       | IDIDTT    | 9.790  | 16.530 | 0.598 | 0.990 | <a href="https://doi.org/10.1039/C8TC06245E">https://doi.org/10.1039/C8TC06245E</a>                       |
| 524. | PBDB-T       | IDIDTT-2F | 11.290 | 19.790 | 0.619 | 0.920 | <a href="https://doi.org/10.1039/C8TC06245E">https://doi.org/10.1039/C8TC06245E</a>                       |
| 525. | PBTZNT       | m-ITIC    | 9.230  | 15.190 | 0.664 | 0.890 | <a href="https://doi.org/10.1039/C9TC00403C">https://doi.org/10.1039/C9TC00403C</a>                       |
| 526. | PFBTZNT      | m-ITIC    | 11.020 | 16.980 | 0.687 | 0.910 | <a href="https://doi.org/10.1039/C9TC00403C">https://doi.org/10.1039/C9TC00403C</a>                       |
| 527. | J51          | ITIC      | 6.100  | 11.130 | 0.650 | 0.830 | <a href="https://doi.org/10.1021/aacs.jpcc.8b08595">https://doi.org/10.1021/aacs.jpcc.8b08595</a>         |
| 528. | PBDB-T       | ITIC      | 7.670  | 14.590 | 0.580 | 0.890 | <a href="https://doi.org/10.1021/aacs.jpcc.8b08595">https://doi.org/10.1021/aacs.jpcc.8b08595</a>         |
| 529. | PBDB-T       | A401      | 7.540  | 13.030 | 0.622 | 0.930 | <a href="https://doi.org/10.1021/aacs.jpcc.8b09336">https://doi.org/10.1021/aacs.jpcc.8b09336</a>         |
| 530. | PBDB-T       | O-IDTBR   | 7.600  | 14.200 | 0.531 | 1.010 | <a href="https://doi.org/10.1021/aacs.jpcc.9b03572">https://doi.org/10.1021/aacs.jpcc.9b03572</a>         |
| 531. | J52          | ITIC      | 3.780  | 10.870 | 0.432 | 0.803 | <a href="https://doi.org/10.1021/aacs.jpcllett.8b03247">https://doi.org/10.1021/aacs.jpcllett.8b03247</a> |
| 532. | J52-2Cl      | ITIC      | 11.530 | 17.170 | 0.702 | 0.956 | <a href="https://doi.org/10.1021/aacs.jpcllett.8b03247">https://doi.org/10.1021/aacs.jpcllett.8b03247</a> |
| 533. | PTB7-Th      | FNIC1     | 10.300 | 19.840 | 0.651 | 0.772 | <a href="https://doi.org/10.1021/jaacs.8b04027">https://doi.org/10.1021/jaacs.8b04027</a>                 |
| 534. | PTB7-Th      | FNIC2     | 13.000 | 23.810 | 0.727 | 0.732 | <a href="https://doi.org/10.1021/jaacs.8b04027">https://doi.org/10.1021/jaacs.8b04027</a>                 |
| 535. | PTO2         | IT-4F     | 14.700 | 21.500 | 0.750 | 0.910 | <a href="https://doi.org/10.1021/jaacs.8b12937">https://doi.org/10.1021/jaacs.8b12937</a>                 |
| 536. | PzNDT-T-BDD  | IDIC      | 9.720  | 15.650 | 0.711 | 0.875 | <a href="https://doi.org/10.1002/marc.201700872">https://doi.org/10.1002/marc.201700872</a>               |
| 537. | PzNDT-TT-BDD | IDIC      | 8.120  | 15.150 | 0.597 | 0.907 | <a href="https://doi.org/10.1002/marc.201700872">https://doi.org/10.1002/marc.201700872</a>               |
| 538. | PzNDTP-T-BDD | IDIC      | 4.620  | 10.630 | 0.469 | 0.925 | <a href="https://doi.org/10.1002/marc.201700872">https://doi.org/10.1002/marc.201700872</a>               |

|      |                           |            |        |        |       |       |                                                                                                         |
|------|---------------------------|------------|--------|--------|-------|-------|---------------------------------------------------------------------------------------------------------|
| 539. | PBBF                      | IDIC       | 8.500  | 15.300 | 0.588 | 0.950 | <a href="https://doi.org/10.1002/marc.201800660">https://doi.org/10.1002/marc.201800660</a>             |
| 540. | PBDTT                     | IDIC       | 5.300  | 13.700 | 0.439 | 0.880 | <a href="https://doi.org/10.1002/marc.201800660">https://doi.org/10.1002/marc.201800660</a>             |
| 541. | PNQ <sub>x</sub> -2F2T-HW | IT-M       | 7.400  | 14.100 | 0.650 | 0.810 | <a href="https://doi.org/10.1002/marc.201900120">https://doi.org/10.1002/marc.201900120</a>             |
| 542. | PNQ <sub>x</sub> -2F2T-LW | IT-M       | 7.500  | 14.300 | 0.660 | 0.800 | <a href="https://doi.org/10.1002/marc.201900120">https://doi.org/10.1002/marc.201900120</a>             |
| 543. | PTB7-Th                   | COi7IC     | 6.360  | 13.120 | 0.589 | 0.820 | <a href="https://doi.org/10.1039/C8QM00285A">https://doi.org/10.1039/C8QM00285A</a>                     |
| 544. | PTB7-Th                   | COi7DFIC   | 8.320  | 17.360 | 0.719 | 0.670 | <a href="https://doi.org/10.1039/C8QM00285A">https://doi.org/10.1039/C8QM00285A</a>                     |
| 545. | PBDB-T:DF                 | DF-PCNC    | 11.630 | 18.160 | 0.726 | 0.860 | <a href="https://doi.org/10.1039/C8QM00318A">https://doi.org/10.1039/C8QM00318A</a>                     |
| 546. | P3HT                      | H-IDTzR    | 3.530  | 6.290  | 0.525 | 1.040 | <a href="https://doi.org/10.1039/C8QM00461G">https://doi.org/10.1039/C8QM00461G</a>                     |
| 547. | P3HT                      | P-IDTzR    | 5.010  | 8.360  | 0.546 | 1.020 | <a href="https://doi.org/10.1039/C8QM00461G">https://doi.org/10.1039/C8QM00461G</a>                     |
| 548. | PBD                       | IT-M       | 8.330  | 13.970 | 0.596 | 1.000 | <a href="https://doi.org/10.1039/C8QM00604K">https://doi.org/10.1039/C8QM00604K</a>                     |
| 549. | PBD2T                     | IT-M       | 10.340 | 15.950 | 0.728 | 0.890 | <a href="https://doi.org/10.1039/C8QM00604K">https://doi.org/10.1039/C8QM00604K</a>                     |
| 550. | PTB7-Th                   | CO5DFIC    | 5.580  | 14.190 | 0.674 | 0.580 | <a href="https://doi.org/10.1039/C8QM00647D">https://doi.org/10.1039/C8QM00647D</a>                     |
| 551. | PTB7-Th                   | CO5DFIC-ST | 9.730  | 20.710 | 0.637 | 0.740 | <a href="https://doi.org/10.1039/C8QM00647D">https://doi.org/10.1039/C8QM00647D</a>                     |
| 552. | PTB7-Th                   | BDTThIT-4F | 9.610  | 18.120 | 0.711 | 0.746 | <a href="https://doi.org/10.1016/j.nanoen.2018.11.010">https://doi.org/10.1016/j.nanoen.2018.11.010</a> |
| 553. | PTB7-Th                   | IEICO-4F   | 10.850 | 23.540 | 0.634 | 0.727 | <a href="https://doi.org/10.1016/j.nanoen.2018.11.010">https://doi.org/10.1016/j.nanoen.2018.11.010</a> |
| 554. | PBDB-T                    | IT-M       | 11.830 | 17.290 | 0.732 | 0.930 | <a href="https://doi.org/10.1039/C9NH00209J">https://doi.org/10.1039/C9NH00209J</a>                     |
| 555. | PBDB-T                    | ITIC       | 8.980  | 15.150 | 0.656 | 0.900 | <a href="https://doi.org/10.1039/C8NH00319J">https://doi.org/10.1039/C8NH00319J</a>                     |

|      |                 |                                     |        |        |       |       |                                                                                                       |
|------|-----------------|-------------------------------------|--------|--------|-------|-------|-------------------------------------------------------------------------------------------------------|
| 556. | PBTT            | IEICO                               | 9.500  | 17.900 | 0.613 | 0.860 | <a href="https://doi.org/10.1016/j.orgel.2018.10.026">https://doi.org/10.1016/j.orgel.2018.10.026</a> |
| 557. | PTB7-Th         | IEICO                               | 7.300  | 13.300 | 0.605 | 0.910 | <a href="https://doi.org/10.1016/j.orgel.2018.10.026">https://doi.org/10.1016/j.orgel.2018.10.026</a> |
| 558. | PBDB-T          | IT-M                                | 11.200 | 16.610 | 0.718 | 0.940 | <a href="https://doi.org/10.1002/pssr.201900217">https://doi.org/10.1002/pssr.201900217</a>           |
| 559. | PBDB-T          | ITCC                                | 8.700  | 12.220 | 0.725 | 0.990 | <a href="https://doi.org/10.1002/pssr.201900217">https://doi.org/10.1002/pssr.201900217</a>           |
| 560. | PTBDD2F-a       | ITIC                                | 6.600  | 13.240 | 0.490 | 0.960 | <a href="https://doi.org/10.1039/C8PY01458B">https://doi.org/10.1039/C8PY01458B</a>                   |
| 561. | PTBDD2F-s       | ITIC                                | 5.470  | 11.680 | 0.460 | 0.960 | <a href="https://doi.org/10.1039/C8PY01458B">https://doi.org/10.1039/C8PY01458B</a>                   |
| 562. | PBT1-C-LW       | ITCPTC                              | 10.800 | 15.900 | 0.740 | 0.920 | <a href="https://doi.org/10.1002/solr.201800129">https://doi.org/10.1002/solr.201800129</a>           |
| 563. | PBT1-C-MW       | ITCPTC                              | 12.800 | 17.200 | 0.790 | 0.940 | <a href="https://doi.org/10.1002/solr.201800129">https://doi.org/10.1002/solr.201800129</a>           |
| 564. | PBT1-C-MW2      | ITCPTC                              | 12.400 | 17.100 | 0.780 | 0.930 | <a href="https://doi.org/10.1002/solr.201800129">https://doi.org/10.1002/solr.201800129</a>           |
| 565. | PBT1-C-HW       | ITCPTC                              | 12.000 | 16.800 | 0.770 | 0.930 | <a href="https://doi.org/10.1002/solr.201800129">https://doi.org/10.1002/solr.201800129</a>           |
| 566. | PBT1-C          | TPPTTT-IC                           | 7.910  | 12.470 | 0.637 | 0.996 | <a href="https://doi.org/10.1002/solr.201800246">https://doi.org/10.1002/solr.201800246</a>           |
| 567. | PBT1-C          | TPPTTT-2F                           | 11.520 | 16.780 | 0.746 | 0.920 | <a href="https://doi.org/10.1002/solr.201800246">https://doi.org/10.1002/solr.201800246</a>           |
| 568. | PBT1-C          | TPPTTT-4F                           | 12.050 | 19.360 | 0.721 | 0.863 | <a href="https://doi.org/10.1002/solr.201800246">https://doi.org/10.1002/solr.201800246</a>           |
| 569. | PM6             | BDS <sub>Se</sub> IC                | 7.100  | 14.000 | 0.519 | 0.970 | <a href="https://doi.org/10.1002/solr.201800250">https://doi.org/10.1002/solr.201800250</a>           |
| 570. | PM6             | BDS <sub>Se</sub> IC2B <sub>r</sub> | 12.500 | 20.300 | 0.691 | 0.890 | <a href="https://doi.org/10.1002/solr.201800250">https://doi.org/10.1002/solr.201800250</a>           |
| 571. | PM6             | BDS <sub>Se</sub> IC4B <sub>r</sub> | 9.600  | 16.400 | 0.686 | 0.850 | <a href="https://doi.org/10.1002/solr.201800250">https://doi.org/10.1002/solr.201800250</a>           |
| 572. | P(fTh-2DBDT)-C6 | ITIC-Th                             | 11.100 | 17.100 | 0.628 | 0.940 | <a href="https://doi.org/10.1002/sml.201805321">https://doi.org/10.1002/sml.201805321</a>             |



|      |            |            |        |        |       |       |                                                                                                       |
|------|------------|------------|--------|--------|-------|-------|-------------------------------------------------------------------------------------------------------|
| 573. | PBT1-C     | ITIC-2Cl   | 11.100 | 18.030 | 0.703 | 0.860 | <a href="https://doi.org/10.1002/adma.201803045">https://doi.org/10.1002/adma.201803045</a>           |
| 574. | PBT1-C     | IT-2F      | 11.040 | 17.280 | 0.727 | 0.879 | <a href="https://doi.org/10.1002/adfm.201807006">https://doi.org/10.1002/adfm.201807006</a>           |
| 575. | PBT1-C     | TPT-2F     | 8.330  | 13.890 | 0.686 | 0.874 | <a href="https://doi.org/10.1039/C8TA07334A">https://doi.org/10.1039/C8TA07334A</a>                   |
| 576. | PBT1-C     | TPTT-2F    | 10.170 | 15.820 | 0.730 | 0.881 | <a href="https://doi.org/10.1039/C8TA07334A">https://doi.org/10.1039/C8TA07334A</a>                   |
| 577. | PBT1-C     | TPTTT-2F   | 12.030 | 17.630 | 0.745 | 0.916 | <a href="https://doi.org/10.1039/C8TA07334A">https://doi.org/10.1039/C8TA07334A</a>                   |
| 578. | PBT1-C-2Cl | IDTT-2F-Th | 10.900 | 17.510 | 0.750 | 0.830 | <a href="https://doi.org/10.1039/C9TA01285K">https://doi.org/10.1039/C9TA01285K</a>                   |
| 579. | PBT1-C-2Cl | ITCPTC     | 12.240 | 18.020 | 0.759 | 0.895 | <a href="https://doi.org/10.1039/C9TA01285K">https://doi.org/10.1039/C9TA01285K</a>                   |
| 580. | J61        | IDIC       | 9.820  | 17.400 | 0.645 | 0.870 | <a href="https://doi.org/10.1039/C8TA08406H">https://doi.org/10.1039/C8TA08406H</a>                   |
| 581. | J61        | BT-IC      | 8.690  | 15.380 | 0.687 | 0.820 | <a href="https://doi.org/10.1039/C8TA08406H">https://doi.org/10.1039/C8TA08406H</a>                   |
| 582. | PTB7-Th    | COi8DFIC   | 10.720 | 22.300 | 0.677 | 0.710 | <a href="https://doi.org/10.1039/C8TA08891H">https://doi.org/10.1039/C8TA08891H</a>                   |
| 583. | PTB7-Th    | IEICO-4F   | 10.460 | 22.120 | 0.643 | 0.736 | <a href="https://doi.org/10.1039/C8TA08891H">https://doi.org/10.1039/C8TA08891H</a>                   |
| 584. | PBDB-T     | IT-M       | 3.740  | 14.940 | 0.465 | 0.540 | <a href="https://doi.org/10.1021/acsaem.8b02252">https://doi.org/10.1021/acsaem.8b02252</a>           |
| 585. | PBDB-T     | IT-M       | 11.150 | 16.590 | 0.675 | 0.952 | <a href="https://doi.org/10.1021/acsam.8b17246">https://doi.org/10.1021/acsam.8b17246</a>             |
| 586. | J71        | m-ITIC     | 11.730 | 17.530 | 0.712 | 0.940 | <a href="https://doi.org/10.1021/cs.macromol.9b00484">https://doi.org/10.1021/cs.macromol.9b00484</a> |
| 587. | J75        | m-ITIC     | 11.410 | 17.110 | 0.695 | 0.960 | <a href="https://doi.org/10.1021/cs.macromol.9b00484">https://doi.org/10.1021/cs.macromol.9b00484</a> |
| 588. | J76        | m-ITIC     | 11.040 | 17.040 | 0.712 | 0.910 | <a href="https://doi.org/10.1021/cs.macromol.9b00484">https://doi.org/10.1021/cs.macromol.9b00484</a> |
| 589. | PPDT2FBT   | ITIC-M     | 7.200  | 13.320 | 0.590 | 0.910 | <a href="https://doi.org/10.1021/acsaelm.9b00328">https://doi.org/10.1021/acsaelm.9b00328</a>         |

|      |                |        |        |        |       |       |                                                                                               |
|------|----------------|--------|--------|--------|-------|-------|-----------------------------------------------------------------------------------------------|
| 590. | PBDTT-8ttTPD-L | ITIC   | 5.760  | 11.470 | 0.550 | 0.920 | <a href="https://doi.org/10.1021/a-csaem.9b00835">https://doi.org/10.1021/a-csaem.9b00835</a> |
| 591. | PBDTT-8ttTPD-M | ITIC   | 8.270  | 14.790 | 0.600 | 0.930 | <a href="https://doi.org/10.1021/a-csaem.9b00835">https://doi.org/10.1021/a-csaem.9b00835</a> |
| 592. | PBDTT-8ttTPD-H | ITIC   | 11.050 | 17.520 | 0.680 | 0.930 | <a href="https://doi.org/10.1021/a-csaem.9b00835">https://doi.org/10.1021/a-csaem.9b00835</a> |
| 593. | PBDB-T         | ITIC   | 9.190  | 15.850 | 0.640 | 0.900 | <a href="https://doi.org/10.1021/a-csami.9b04113">https://doi.org/10.1021/a-csami.9b04113</a> |
| 594. | PBDB-TF        | IEIC   | 3.800  | 7.650  | 0.450 | 1.110 | <a href="https://doi.org/10.1021/a-csami.9b10243">https://doi.org/10.1021/a-csami.9b10243</a> |
| 595. | PBDB-T         | IEIC   | 7.300  | 15.050 | 0.480 | 1.020 | <a href="https://doi.org/10.1021/a-csami.9b10243">https://doi.org/10.1021/a-csami.9b10243</a> |
| 596. | PBDB-T         | IE-4F  | 9.300  | 18.230 | 0.560 | 0.910 | <a href="https://doi.org/10.1021/a-csami.9b10243">https://doi.org/10.1021/a-csami.9b10243</a> |
| 597. | PBDB-TF        | IE-4F  | 10.800 | 21.350 | 0.580 | 0.870 | <a href="https://doi.org/10.1021/a-csami.9b10243">https://doi.org/10.1021/a-csami.9b10243</a> |
| 598. | PBDB-T         | IE-4Cl | 9.700  | 17.820 | 0.610 | 0.890 | <a href="https://doi.org/10.1021/a-csami.9b10243">https://doi.org/10.1021/a-csami.9b10243</a> |
| 599. | PBDB-T         | IE-4Cl | 11.100 | 21.490 | 0.600 | 0.860 | <a href="https://doi.org/10.1021/a-csami.9b10243">https://doi.org/10.1021/a-csami.9b10243</a> |
| 600. | P3HT           | BTDT2R | 5.090  | 9.420  | 0.670 | 0.810 | <a href="https://doi.org/10.1021/a-csami.9b09256">https://doi.org/10.1021/a-csami.9b09256</a> |
| 601. | PPDT2FBT       | BTDT2R | 6.900  | 11.230 | 0.570 | 1.070 | <a href="https://doi.org/10.1021/a-csami.9b09256">https://doi.org/10.1021/a-csami.9b09256</a> |
| 602. | PTB7-Th        | BTDT2R | 8.190  | 13.520 | 0.570 | 1.060 | <a href="https://doi.org/10.1021/a-csami.9b09256">https://doi.org/10.1021/a-csami.9b09256</a> |
| 603. | PY1            | ITIC   | 12.490 | 18.460 | 0.720 | 0.940 | <a href="https://doi.org/10.1021/a-csami.9b09486">https://doi.org/10.1021/a-csami.9b09486</a> |
| 604. | PY2            | ITIC   | 7.390  | 14.540 | 0.660 | 0.770 | <a href="https://doi.org/10.1021/a-csami.9b09486">https://doi.org/10.1021/a-csami.9b09486</a> |
| 605. | DOTFP-PhI      | IT-4F  | 10.650 | 17.750 | 0.701 | 0.856 | <a href="https://doi.org/10.1021/a-csami.9b09692">https://doi.org/10.1021/a-csami.9b09692</a> |

|      |              |           |        |        |       |       |                                                                                                     |
|------|--------------|-----------|--------|--------|-------|-------|-----------------------------------------------------------------------------------------------------|
| 606. | DOTFP-TPD    | IT-4F     | 10.040 | 18.340 | 0.674 | 0.812 | <a href="https://doi.org/10.1021/a csami.9b096 92">https://doi.org/10.1021/a csami.9b096 92</a>     |
| 607. | PBDB-T       | BDCPDT-IC | 9.330  | 16.560 | 0.655 | 0.860 | <a href="https://doi.org/10.1021/a csami.9b084 62">https://doi.org/10.1021/a csami.9b084 62</a>     |
| 608. | PBDB-T       | BDCPDT-BC | 10.820 | 18.550 | 0.634 | 0.920 | <a href="https://doi.org/10.1021/a csami.9b084 62">https://doi.org/10.1021/a csami.9b084 62</a>     |
| 609. | PBDB-T       | ITIC      | 9.250  | 14.260 | 0.641 | 0.970 | <a href="https://doi.org/10.1021/a csami.9b084 62">https://doi.org/10.1021/a csami.9b084 62</a>     |
| 610. | PBDB-T       | ITBC      | 10.740 | 17.220 | 0.636 | 0.980 | <a href="https://doi.org/10.1021/a csami.9b084 62">https://doi.org/10.1021/a csami.9b084 62</a>     |
| 611. | PBDB-T       | DTCC-IC   | 10.050 | 16.750 | 0.652 | 0.920 | <a href="https://doi.org/10.1021/a csami.9b084 62">https://doi.org/10.1021/a csami.9b084 62</a>     |
| 612. | PBDB-T       | DTCC-BC   | 12.070 | 19.900 | 0.645 | 0.940 | <a href="https://doi.org/10.1021/a csami.9b084 62">https://doi.org/10.1021/a csami.9b084 62</a>     |
| 613. | PBDB-T-SF    | ITIC2     | 10.100 | 15.490 | 0.586 | 1.069 | <a href="https://doi.org/10.1021/a csami.9b117 00">https://doi.org/10.1021/a csami.9b117 00</a>     |
| 614. | PBDB-T-SF    | ITIC-S    | 11.600 | 16.400 | 0.663 | 1.046 | <a href="https://doi.org/10.1021/a csami.9b117 00">https://doi.org/10.1021/a csami.9b117 00</a>     |
| 615. | PBnDT-FTAZNO | IT-M      | 7.060  | 15.440 | 0.525 | 0.870 | <a href="https://doi.org/10.1021/a csapm.9b00 044">https://doi.org/10.1021/a csapm.9b00 044</a>     |
| 616. | PBnDT-OTAZ   | IT-M      | 3.570  | 11.580 | 0.434 | 0.709 | <a href="https://doi.org/10.1021/a csapm.9b00 044">https://doi.org/10.1021/a csapm.9b00 044</a>     |
| 617. | PBoDT-OTAZ   | IT-M      | 1.230  | 9.510  | 0.336 | 0.382 | <a href="https://doi.org/10.1021/a csapm.9b00 044">https://doi.org/10.1021/a csapm.9b00 044</a>     |
| 618. | PDTPO-BDTT   | IT-4F     | 10.960 | 19.180 | 0.704 | 0.810 | <a href="https://doi.org/10.1021/a csomega.9b 01363">https://doi.org/10.1021/a csomega.9b 01363</a> |
| 619. | PDTPO-BDTT   | NNFA-4F   | 10.040 | 19.300 | 0.628 | 0.830 | <a href="https://doi.org/10.1021/a csomega.9b 01363">https://doi.org/10.1021/a csomega.9b 01363</a> |
| 620. | PDTPO-BDTT   | COi8DFIC  | 6.460  | 16.960 | 0.468 | 0.810 | <a href="https://doi.org/10.1021/a csomega.9b 01363">https://doi.org/10.1021/a csomega.9b 01363</a> |
| 621. | PBDB-T       | IDTCN-C   | 11.920 | 20.330 | 0.696 | 0.840 | <a href="https://doi.org/10.1002/a enm.201901 280">https://doi.org/10.1002/a enm.201901 280</a>     |

|      |           |           |        |        |       |       |                                                                                             |
|------|-----------|-----------|--------|--------|-------|-------|---------------------------------------------------------------------------------------------|
| 622. | PBDB-T    | IDTCN-O   | 13.280 | 19.960 | 0.732 | 0.910 | <a href="https://doi.org/10.1002/aenm.201901280">https://doi.org/10.1002/aenm.201901280</a> |
| 623. | PBDB-T    | IDTCN-S   | 10.600 | 19.040 | 0.657 | 0.850 | <a href="https://doi.org/10.1002/aenm.201901280">https://doi.org/10.1002/aenm.201901280</a> |
| 624. | PM6       | IT-4F     | 12.880 | 20.600 | 0.750 | 0.833 | <a href="https://doi.org/10.1002/aenm.201901728">https://doi.org/10.1002/aenm.201901728</a> |
| 625. | PM6       | Y6        | 15.450 | 25.050 | 0.720 | 0.857 | <a href="https://doi.org/10.1002/aenm.201901728">https://doi.org/10.1002/aenm.201901728</a> |
| 626. | PM6       | Y6        | 15.750 | 24.890 | 0.744 | 0.845 | <a href="https://doi.org/10.1002/adma.201902210">https://doi.org/10.1002/adma.201902210</a> |
| 627. | PBDB-TF   | Y6        | 15.300 | 24.800 | 0.741 | 0.834 | <a href="https://doi.org/10.1002/adma.201902302">https://doi.org/10.1002/adma.201902302</a> |
| 628. | PBDB-TF   | BTP-4F-8  | 15.300 | 24.600 | 0.740 | 0.841 | <a href="https://doi.org/10.1002/adma.201903441">https://doi.org/10.1002/adma.201903441</a> |
| 629. | PBDB-TF   | BTP-4F-12 | 16.400 | 25.300 | 0.760 | 0.855 | <a href="https://doi.org/10.1002/adma.201903441">https://doi.org/10.1002/adma.201903441</a> |
| 630. | PTB7-Th   | O-IDTBR   | 9.900  | 15.500 | 0.600 | 1.020 | <a href="https://doi.org/10.1002/dfm.201808429">https://doi.org/10.1002/dfm.201808429</a>   |
| 631. | PTB7-Th   | O-IDTBCN  | 11.100 | 19.800 | 0.730 | 0.720 | <a href="https://doi.org/10.1002/dfm.201808429">https://doi.org/10.1002/dfm.201808429</a>   |
| 632. | PBDTT-DPP | ITIC      | 3.700  | 7.400  | 0.592 | 0.844 | <a href="https://doi.org/10.1002/dfm.201902441">https://doi.org/10.1002/dfm.201902441</a>   |
| 633. | PBDTT-DPP | IEICO-4F  | 8.140  | 18.500 | 0.648 | 0.679 | <a href="https://doi.org/10.1002/dfm.201902441">https://doi.org/10.1002/dfm.201902441</a>   |
| 634. | PBDB-T    | INPIC-4F  | 12.100 | 21.300 | 0.669 | 0.850 | <a href="https://doi.org/10.1002/dfm.201903269">https://doi.org/10.1002/dfm.201903269</a>   |
| 635. | PBDB-T    | p-INPOIC  | 10.600 | 19.000 | 0.661 | 0.846 | <a href="https://doi.org/10.1002/dfm.201903269">https://doi.org/10.1002/dfm.201903269</a>   |
| 636. | PBDB-T    | m-INPOIC  | 9.710  | 18.400 | 0.632 | 0.835 | <a href="https://doi.org/10.1002/dfm.201903269">https://doi.org/10.1002/dfm.201903269</a>   |
| 637. | PBTA-PS   | LA1       | 10.220 | 15.170 | 0.751 | 0.890 | <a href="https://doi.org/10.1002/dfm.201903596">https://doi.org/10.1002/dfm.201903596</a>   |

|      |           |           |        |        |       |       |                                                                                                           |
|------|-----------|-----------|--------|--------|-------|-------|-----------------------------------------------------------------------------------------------------------|
| 638. | PBTA-PS   | 6TIC      | 8.150  | 15.470 | 0.623 | 0.840 | <a href="https://doi.org/10.1002/afm.201903596">https://doi.org/10.1002/afm.201903596</a>                 |
| 639. | PFBDB-T   | CDTTIC    | 11.500 | 24.900 | 0.560 | 0.780 | <a href="https://doi.org/10.1002/afm.201904956">https://doi.org/10.1002/afm.201904956</a>                 |
| 640. | J71       | HCN-C8    | 2.380  | 6.240  | 0.378 | 1.010 | <a href="https://doi.org/10.1021/acs.chemmater.9b02355">https://doi.org/10.1021/acs.chemmater.9b02355</a> |
| 641. | J71       | HCN-C16   | 5.510  | 12.300 | 0.435 | 1.030 | <a href="https://doi.org/10.1021/acs.chemmater.9b02355">https://doi.org/10.1021/acs.chemmater.9b02355</a> |
| 642. | J71       | H2FCN-C16 | 11.180 | 18.620 | 0.667 | 0.900 | <a href="https://doi.org/10.1021/acs.chemmater.9b02355">https://doi.org/10.1021/acs.chemmater.9b02355</a> |
| 643. | PBDB-TF   | C8-ITCC   | 10.800 | 16.100 | 0.630 | 1.040 | <a href="https://doi.org/10.1021/acs.chemmater.9b00980">https://doi.org/10.1021/acs.chemmater.9b00980</a> |
| 644. | PBDB-TF   | C8-ITCC-C | 12.700 | 17.900 | 0.730 | 0.950 | <a href="https://doi.org/10.1021/acs.chemmater.9b00980">https://doi.org/10.1021/acs.chemmater.9b00980</a> |
| 645. | PBDB-T-Cl | PBIBDT-C  | 6.630  | 9.890  | 0.590 | 1.140 | <a href="https://doi.org/10.1002/cphc.201900309">https://doi.org/10.1002/cphc.201900309</a>               |
| 646. | PTBTz-2   | IT-M      | 10.510 | 17.610 | 0.618 | 0.954 | <a href="https://doi.org/10.1039/C9TA04286E">https://doi.org/10.1039/C9TA04286E</a>                       |
| 647. | PBDB-T    | DTFT5-FIC | 5.450  | 11.640 | 0.520 | 0.900 | <a href="https://doi.org/10.1039/C9TA05116C">https://doi.org/10.1039/C9TA05116C</a>                       |
| 648. | PBDB-T    | DTFT9-FIC | 9.580  | 19.010 | 0.586 | 0.860 | <a href="https://doi.org/10.1039/C9TA05116C">https://doi.org/10.1039/C9TA05116C</a>                       |
| 649. | PBDB-T    | o-F-ITIC  | 11.110 | 18.070 | 0.670 | 0.918 | <a href="https://doi.org/10.1039/C9TA07133D">https://doi.org/10.1039/C9TA07133D</a>                       |
| 650. | PBDB-T    | m-F-ITIC  | 8.900  | 15.800 | 0.638 | 0.883 | <a href="https://doi.org/10.1039/C9TA07133D">https://doi.org/10.1039/C9TA07133D</a>                       |
| 651. | PBDB-TF   | IT-2F     | 13.680 | 19.350 | 0.760 | 0.930 | <a href="https://doi.org/10.1039/C9TA04789A">https://doi.org/10.1039/C9TA04789A</a>                       |
| 652. | PBDB-TF   | IT-2Cl    | 13.740 | 19.800 | 0.750 | 0.920 | <a href="https://doi.org/10.1039/C9TA04789A">https://doi.org/10.1039/C9TA04789A</a>                       |
| 653. | PBDB-TF   | IT-4F     | 13.350 | 20.420 | 0.750 | 0.870 | <a href="https://doi.org/10.1039/C9TA04789A">https://doi.org/10.1039/C9TA04789A</a>                       |
| 654. | PBDB-TF   | IT-4Cl    | 12.870 | 22.120 | 0.740 | 0.790 | <a href="https://doi.org/10.1039/C9TA04789A">https://doi.org/10.1039/C9TA04789A</a>                       |

|      |         |            |        |        |       |       |                                                                                                 |
|------|---------|------------|--------|--------|-------|-------|-------------------------------------------------------------------------------------------------|
| 655. | PBDB-TF | ITCC       | 9.510  | 14.200 | 0.620 | 1.070 | <a href="https://doi.org/10.1039/C9TA04789A">https://doi.org/10.1039/C9TA04789A</a>             |
| 656. | PBDB-TF | IT-M       | 10.420 | 16.130 | 0.630 | 1.010 | <a href="https://doi.org/10.1039/C9TA04789A">https://doi.org/10.1039/C9TA04789A</a>             |
| 657. | PBDB-TF | ITIC       | 10.750 | 16.420 | 0.650 | 1.000 | <a href="https://doi.org/10.1039/C9TA04789A">https://doi.org/10.1039/C9TA04789A</a>             |
| 658. | PBT1-C  | IT-2F      | 10.540 | 15.970 | 0.708 | 0.902 | <a href="https://doi.org/10.1039/C9TA06476A">https://doi.org/10.1039/C9TA06476A</a>             |
| 659. | PBT1-C  | TTPT-T-2F  | 12.710 | 17.700 | 0.751 | 0.915 | <a href="https://doi.org/10.1039/C9TA06476A">https://doi.org/10.1039/C9TA06476A</a>             |
| 660. | PBT1-C  | T-TPT-T-2F | 10.710 | 16.570 | 0.671 | 0.933 | <a href="https://doi.org/10.1039/C9TA06476A">https://doi.org/10.1039/C9TA06476A</a>             |
| 661. | PTB7-Th | FUIC       | 11.200 | 23.300 | 0.689 | 0.692 | <a href="https://doi.org/10.1039/C9TA07917C">https://doi.org/10.1039/C9TA07917C</a>             |
| 662. | PTB7-Th | i-FUIC     | 10.300 | 20.200 | 0.634 | 0.779 | <a href="https://doi.org/10.1039/C9TA07917C">https://doi.org/10.1039/C9TA07917C</a>             |
| 663. | PM6     | IT-4F      | 13.100 | 20.600 | 0.759 | 0.835 | <a href="https://doi.org/10.1039/C9TA06929A">https://doi.org/10.1039/C9TA06929A</a>             |
| 664. | PM7     | IT-4F      | 13.400 | 20.500 | 0.768 | 0.852 | <a href="https://doi.org/10.1039/C9TA06929A">https://doi.org/10.1039/C9TA06929A</a>             |
| 665. | PM6     | Y6         | 15.500 | 24.500 | 0.746 | 0.848 | <a href="https://doi.org/10.1039/C9TA06929A">https://doi.org/10.1039/C9TA06929A</a>             |
| 666. | PM7     | Y6         | 15.400 | 24.200 | 0.728 | 0.875 | <a href="https://doi.org/10.1039/C9TA06929A">https://doi.org/10.1039/C9TA06929A</a>             |
| 667. | PTB7-Th | IEICO-4F   | 11.710 | 25.680 | 0.653 | 0.690 | <a href="https://doi.org/10.1039/C9TA07542A">https://doi.org/10.1039/C9TA07542A</a>             |
| 668. | PBDB-T  | IPT-2F     | 14.000 | 22.400 | 0.724 | 0.860 | <a href="https://doi.org/10.1039/C9TA07634D">https://doi.org/10.1039/C9TA07634D</a>             |
| 669. | PBDB-T  | IPTT-2F    | 11.400 | 19.700 | 0.662 | 0.874 | <a href="https://doi.org/10.1039/C9TA07634D">https://doi.org/10.1039/C9TA07634D</a>             |
| 670. | PBDB-T  | IPTTT-2F   | 12.300 | 20.000 | 0.693 | 0.894 | <a href="https://doi.org/10.1039/C9TA07634D">https://doi.org/10.1039/C9TA07634D</a>             |
| 671. | PTB7-Th | IEICO-4F   | 8.330  | 18.850 | 0.610 | 0.720 | <a href="https://doi.org/10.1021/acs.jpcc.9b06267">https://doi.org/10.1021/acs.jpcc.9b06267</a> |
| 672. | PBDB-T  | ITIC       | 9.260  | 17.130 | 0.620 | 0.870 | <a href="https://doi.org/10.1021/acs.jpcc.9b06267">https://doi.org/10.1021/acs.jpcc.9b06267</a> |

|      |                          |                   |        |        |       |       |                                                                                                         |
|------|--------------------------|-------------------|--------|--------|-------|-------|---------------------------------------------------------------------------------------------------------|
| 673. | PBDB-T                   | IEICO-4F          | 8.500  | 20.910 | 0.520 | 0.770 | <a href="https://doi.org/10.1021/acs.jpcc.9b06267">https://doi.org/10.1021/acs.jpcc.9b06267</a>         |
| 674. | PBDB-T2F                 | ITIC-2Cl- $\beta$ | 11.210 | 18.470 | 0.646 | 0.940 | <a href="https://doi.org/10.1021/acs.jpcllett.9b01931">https://doi.org/10.1021/acs.jpcllett.9b01931</a> |
| 675. | PBDB-T2F                 | a-ITIC-2Cl        | 12.230 | 18.910 | 0.735 | 0.880 | <a href="https://doi.org/10.1021/acs.jpcllett.9b01931">https://doi.org/10.1021/acs.jpcllett.9b01931</a> |
| 676. | PBTIBD TT                | ITIC              | 8.890  | 14.390 | 0.644 | 0.960 | <a href="https://doi.org/10.1039/C9TC02700A">https://doi.org/10.1039/C9TC02700A</a>                     |
| 677. | PBTIBD TT                | oF-ITIC           | 9.010  | 13.490 | 0.710 | 0.940 | <a href="https://doi.org/10.1039/C9TC02700A">https://doi.org/10.1039/C9TC02700A</a>                     |
| 678. | PBTIBD TT                | mF-ITIC           | 9.500  | 14.530 | 0.681 | 0.960 | <a href="https://doi.org/10.1039/C9TC02700A">https://doi.org/10.1039/C9TC02700A</a>                     |
| 679. | PBDB-T                   | IDT-PhIC          | 5.110  | 9.990  | 0.547 | 0.930 | <a href="https://doi.org/10.1039/C9TC02237F">https://doi.org/10.1039/C9TC02237F</a>                     |
| 680. | PBDB-TF                  | IT-4F             | 12.290 | 19.550 | 0.748 | 0.840 | <a href="https://doi.org/10.1039/C9TC03534F">https://doi.org/10.1039/C9TC03534F</a>                     |
| 681. | PBDB-TF                  | O6T-4F            | 7.220  | 16.370 | 0.558 | 0.790 | <a href="https://doi.org/10.1039/C9TC03534F">https://doi.org/10.1039/C9TC03534F</a>                     |
| 682. | PBBF                     | IDIC              | 8.500  | 15.300 | 0.588 | 0.950 | <a href="https://doi.org/10.1002/marc.201800660">https://doi.org/10.1002/marc.201800660</a>             |
| 683. | PBD TT                   | IDIC              | 5.300  | 13.700 | 0.439 | 0.880 | <a href="https://doi.org/10.1002/marc.201800660">https://doi.org/10.1002/marc.201800660</a>             |
| 684. | PNQ <sub>x</sub> -2F2THW | IT-M              | 7.400  | 14.100 | 0.650 | 0.810 | <a href="https://doi.org/10.1002/marc.201900120">https://doi.org/10.1002/marc.201900120</a>             |
| 685. | PNQ <sub>x</sub> -2F2TLW | IT-M              | 7.500  | 14.300 | 0.660 | 0.800 | <a href="https://doi.org/10.1002/marc.201900120">https://doi.org/10.1002/marc.201900120</a>             |
| 686. | PE31                     | Y6                | 7.620  | 20.450 | 0.469 | 0.800 | <a href="https://doi.org/10.1021/acs.macromol.9b01233">https://doi.org/10.1021/acs.macromol.9b01233</a> |
| 687. | PE32                     | Y6                | 7.310  | 18.440 | 0.530 | 0.750 | <a href="https://doi.org/10.1021/acs.macromol.9b01233">https://doi.org/10.1021/acs.macromol.9b01233</a> |
| 688. | J52-Cl                   | Y6                | 12.310 | 23.770 | 0.614 | 0.840 | <a href="https://doi.org/10.1021/acs.macromol.9b01233">https://doi.org/10.1021/acs.macromol.9b01233</a> |
| 689. | PE4                      | Y6                | 14.020 | 22.210 | 0.754 | 0.840 | <a href="https://doi.org/10.1021/acs.macromol.9b01233">https://doi.org/10.1021/acs.macromol.9b01233</a> |

|      |           |          |        |        |       |       |                                                                                                           |
|------|-----------|----------|--------|--------|-------|-------|-----------------------------------------------------------------------------------------------------------|
| 690. | PBDB-T-SF | Y6       | 15.180 | 24.680 | 0.712 | 0.864 | <a href="https://doi.org/10.1039/C9MH00844F">https://doi.org/10.1039/C9MH00844F</a>                       |
| 691. | PBDB-T-SF | ITCT     | 10.920 | 18.110 | 0.615 | 0.981 | <a href="https://doi.org/10.1039/C9MH00844F">https://doi.org/10.1039/C9MH00844F</a>                       |
| 692. | PBDB-T-SF | IT-4F    | 12.770 | 20.100 | 0.735 | 0.864 | <a href="https://doi.org/10.1039/C9MH00844F">https://doi.org/10.1039/C9MH00844F</a>                       |
| 693. | PTB7-Th   | IEICO-4F | 10.100 | 20.700 | 0.682 | 0.710 | <a href="https://doi.org/10.1021/aacs.nanolett.9b01344">https://doi.org/10.1021/aacs.nanolett.9b01344</a> |
| 694. | PBDB-T    | Y1       | 12.600 | 20.400 | 0.696 | 0.880 | <a href="https://doi.org/10.1021/aacs.nanolett.9b01344">https://doi.org/10.1021/aacs.nanolett.9b01344</a> |
| 695. | P1        | ITIC     | 7.600  | 16.300 | 0.581 | 0.800 | <a href="https://doi.org/10.1039/C9PY00674E">https://doi.org/10.1039/C9PY00674E</a>                       |
| 696. | P2        | ITIC     | 8.100  | 14.600 | 0.617 | 0.900 | <a href="https://doi.org/10.1039/C9PY00674E">https://doi.org/10.1039/C9PY00674E</a>                       |
| 697. | PT-68     | ITIC     | 5.440  | 11.490 | 0.461 | 1.020 | <a href="https://doi.org/10.1016/j.polymer.2019.121580">https://doi.org/10.1016/j.polymer.2019.121580</a> |
| 698. | PT-810-H  | ITIC     | 7.030  | 12.430 | 0.531 | 1.040 | <a href="https://doi.org/10.1016/j.polymer.2019.121580">https://doi.org/10.1016/j.polymer.2019.121580</a> |
| 699. | PT-810-L  | ITIC     | 6.030  | 10.300 | 0.559 | 1.040 | <a href="https://doi.org/10.1016/j.polymer.2019.121580">https://doi.org/10.1016/j.polymer.2019.121580</a> |
| 700. | P3HT      | SF-HR    | 4.010  | 8.230  | 0.490 | 1.000 | <a href="https://doi.org/10.1039/C9RA03188J">https://doi.org/10.1039/C9RA03188J</a>                       |
| 701. | P(F-Cl)   | IT-4F    | 11.800 | 20.300 | 0.660 | 0.879 | <a href="https://doi.org/10.1002/sml.201902598">https://doi.org/10.1002/sml.201902598</a>                 |
| 702. | P(Cl-Cl)  | IT-4F    | 10.200 | 20.300 | 0.561 | 0.899 | <a href="https://doi.org/10.1002/sml.201902598">https://doi.org/10.1002/sml.201902598</a>                 |
| 703. | PBDB-T2C1 | IDIC-4H  | 4.570  | 10.320 | 0.453 | 0.980 | <a href="https://doi.org/10.1021/aacsami.8b15923">https://doi.org/10.1021/aacsami.8b15923</a>             |
| 704. | PBDB-T2C1 | IDIC-4F  | 7.100  | 13.000 | 0.619 | 0.880 | <a href="https://doi.org/10.1021/aacsami.8b15923">https://doi.org/10.1021/aacsami.8b15923</a>             |
| 705. | PBDB-T2C1 | IDIC-4Cl | 9.240  | 16.210 | 0.687 | 0.830 | <a href="https://doi.org/10.1021/aacsami.8b15923">https://doi.org/10.1021/aacsami.8b15923</a>             |
| 706. | PM6       | Y6       | 15.700 | 25.200 | 0.761 | 0.820 | <a href="https://doi.org/10.1016/j.joule.2019.01.004">https://doi.org/10.1016/j.joule.2019.01.004</a>     |



|      |         |            |        |        |       |       |                                                                                                     |
|------|---------|------------|--------|--------|-------|-------|-----------------------------------------------------------------------------------------------------|
| 707. | PTQ10   | MO-IDIC    | 11.160 | 16.920 | 0.681 | 0.969 | <a href="https://doi.org/10.1038/s41467-019-08508-3">https://doi.org/10.1038/s41467-019-08508-3</a> |
| 708. | PTQ10   | MO-IDIC-2F | 13.460 | 19.870 | 0.748 | 0.906 | <a href="https://doi.org/10.1038/s41467-019-08508-3">https://doi.org/10.1038/s41467-019-08508-3</a> |
| 709. | PBDB-T  | Y1         | 13.420 | 22.440 | 0.691 | 0.870 | <a href="https://doi.org/10.1038/s41467-019-08386-9">https://doi.org/10.1038/s41467-019-08386-9</a> |
| 710. | PBDB-T  | Y2         | 13.400 | 23.560 | 0.694 | 0.820 | <a href="https://doi.org/10.1038/s41467-019-08386-9">https://doi.org/10.1038/s41467-019-08386-9</a> |
| 711. | PBDB-TF | ID4F       | 6.880  | 13.420 | 0.610 | 0.840 | <a href="https://doi.org/10.1038/s41467-019-10098-z">https://doi.org/10.1038/s41467-019-10098-z</a> |
| 712. | PBDB-TF | PTICH      | 4.080  | 8.220  | 0.540 | 0.920 | <a href="https://doi.org/10.1038/s41467-019-10098-z">https://doi.org/10.1038/s41467-019-10098-z</a> |
| 713. | PBDB-TF | PTIC       | 10.270 | 16.730 | 0.660 | 0.930 | <a href="https://doi.org/10.1038/s41467-019-10098-z">https://doi.org/10.1038/s41467-019-10098-z</a> |
| 714. | PBDB-TF | PTICO      | 6.620  | 12.600 | 0.520 | 1.010 | <a href="https://doi.org/10.1038/s41467-019-10098-z">https://doi.org/10.1038/s41467-019-10098-z</a> |
| 715. | PBDB-TF | BTP-4F     | 15.600 | 24.900 | 0.753 | 0.834 | <a href="https://doi.org/10.1038/s41467-019-10351-5">https://doi.org/10.1038/s41467-019-10351-5</a> |
| 716. | PBDB-TF | BTP-4CI    | 16.500 | 25.400 | 0.750 | 0.859 | <a href="https://doi.org/10.1038/s41467-019-10351-5">https://doi.org/10.1038/s41467-019-10351-5</a> |
| 717. | PTB7-Th | ITIC       | 8.400  | 15.890 | 0.630 | 0.820 | <a href="https://doi.org/10.1021/a-csaem.9b01176">https://doi.org/10.1021/a-csaem.9b01176</a>       |
| 718. | PTB7-Th | O-IDTBR    | 5.880  | 13.300 | 0.434 | 1.010 | <a href="https://doi.org/10.1021/a-csaem.9b01534">https://doi.org/10.1021/a-csaem.9b01534</a>       |
| 719. | PTB7-Th | O-IDTBR    | 9.000  | 15.400 | 0.585 | 0.990 | <a href="https://doi.org/10.1021/a-csaem.9b01534">https://doi.org/10.1021/a-csaem.9b01534</a>       |
| 720. | PTB7-Th | O-IDTBR    | 9.420  | 15.000 | 0.616 | 0.990 | <a href="https://doi.org/10.1021/a-csaem.9b01534">https://doi.org/10.1021/a-csaem.9b01534</a>       |
| 721. | PTB7-Th | O-IDTBR    | 9.180  | 14.400 | 0.625 | 1.000 | <a href="https://doi.org/10.1021/a-csaem.9b01534">https://doi.org/10.1021/a-csaem.9b01534</a>       |
| 722. | PTB7-Th | O-IDTBR    | 8.370  | 13.600 | 0.613 | 1.000 | <a href="https://doi.org/10.1021/a-csaem.9b01534">https://doi.org/10.1021/a-csaem.9b01534</a>       |

|      |                   |                       |        |        |       |       |                                                                                               |
|------|-------------------|-----------------------|--------|--------|-------|-------|-----------------------------------------------------------------------------------------------|
| 723. | P6T-F00           | EH-IDTBR              | 4.300  | 6.700  | 0.560 | 1.070 | <a href="https://doi.org/10.1021/a CSAEM.9b01532">https://doi.org/10.1021/a CSAEM.9b01532</a> |
| 724. | P6T-F100          | EH-IDTBR              | 7.300  | 11.200 | 0.660 | 0.990 | <a href="https://doi.org/10.1021/a CSAEM.9b01532">https://doi.org/10.1021/a CSAEM.9b01532</a> |
| 725. | PBDB-T            | ITIC                  | 9.680  | 15.880 | 0.670 | 0.850 | <a href="https://doi.org/10.1021/a CSAEM.9b01591">https://doi.org/10.1021/a CSAEM.9b01591</a> |
| 726. | PBDB-TF           | ITIC-2Cl-Th           | 11.450 | 18.310 | 0.721 | 0.860 | <a href="https://doi.org/10.1021/a CSAEM.9b01667">https://doi.org/10.1021/a CSAEM.9b01667</a> |
| 727. | PBDB-TF           | ITIC-Cl- $\gamma$ -Th | 12.250 | 18.020 | 0.726 | 0.910 | <a href="https://doi.org/10.1021/a CSAEM.9b01667">https://doi.org/10.1021/a CSAEM.9b01667</a> |
| 728. | PBDB-TF           | ITIC-Cl- $\delta$ -Th | 11.130 | 17.270 | 0.719 | 0.890 | <a href="https://doi.org/10.1021/a CSAEM.9b01667">https://doi.org/10.1021/a CSAEM.9b01667</a> |
| 729. | PBDB-T-SF         | ITIC2                 | 10.100 | 15.490 | 0.586 | 1.069 | <a href="https://doi.org/10.1021/a CSAMI.9b11700">https://doi.org/10.1021/a CSAMI.9b11700</a> |
| 730. | PBDB-T-SF         | ITIC-S                | 11.600 | 16.400 | 0.663 | 1.046 | <a href="https://doi.org/10.1021/a CSAMI.9b11700">https://doi.org/10.1021/a CSAMI.9b11700</a> |
| 731. | p-PBDTPS-FTA<br>Z | ITIC                  | 10.860 | 17.910 | 0.661 | 0.880 | <a href="https://doi.org/10.1021/a CSAMI.9b07112">https://doi.org/10.1021/a CSAMI.9b07112</a> |
| 732. | m-PBDTPS-FTA<br>Z | ITIC                  | 13.160 | 18.020 | 0.715 | 0.950 | <a href="https://doi.org/10.1021/a CSAMI.9b07112">https://doi.org/10.1021/a CSAMI.9b07112</a> |
| 733. | PBDB-T            | BDCPDT-IC             | 9.330  | 15.830 | 0.638 | 0.850 | <a href="https://doi.org/10.1021/a CSAMI.9b08462">https://doi.org/10.1021/a CSAMI.9b08462</a> |
| 734. | PBDB-T            | BDCPDT-BC             | 10.820 | 18.310 | 0.625 | 0.920 | <a href="https://doi.org/10.1021/a CSAMI.9b08462">https://doi.org/10.1021/a CSAMI.9b08462</a> |
| 735. | PBDB-T            | DTCC-IC               | 9.250  | 14.260 | 0.641 | 0.970 | <a href="https://doi.org/10.1021/a CSAMI.9b08462">https://doi.org/10.1021/a CSAMI.9b08462</a> |
| 736. | PBDB-T            | DTCC-BC               | 10.740 | 17.160 | 0.615 | 0.980 | <a href="https://doi.org/10.1021/a CSAMI.9b08462">https://doi.org/10.1021/a CSAMI.9b08462</a> |
| 737. | PBDB-T            | ITIC                  | 10.050 | 16.740 | 0.642 | 0.920 | <a href="https://doi.org/10.1021/a CSAMI.9b08462">https://doi.org/10.1021/a CSAMI.9b08462</a> |
| 738. | PBDB-T            | ITBC                  | 12.070 | 19.610 | 0.635 | 0.940 | <a href="https://doi.org/10.1021/a CSAMI.9b08462">https://doi.org/10.1021/a CSAMI.9b08462</a> |

|      |            |            |        |        |       |       |                                                                                                 |
|------|------------|------------|--------|--------|-------|-------|-------------------------------------------------------------------------------------------------|
| 739. | PBDB-T     | ATT-1      | 9.000  | 16.010 | 0.600 | 0.920 | <a href="https://doi.org/10.1021/a csami.9b106 41">https://doi.org/10.1021/a csami.9b106 41</a> |
| 740. | PBDB-T     | ATT-4      | 11.220 | 17.130 | 0.680 | 0.925 | <a href="https://doi.org/10.1021/a csami.9b106 41">https://doi.org/10.1021/a csami.9b106 41</a> |
| 741. | PBDB-T     | ATT-5      | 12.360 | 18.560 | 0.700 | 0.927 | <a href="https://doi.org/10.1021/a csami.9b106 41">https://doi.org/10.1021/a csami.9b106 41</a> |
| 742. | PBDB-T-2F  | IT-4F      | 11.600 | 19.300 | 0.719 | 0.810 | <a href="https://doi.org/10.1021/a csami.9b144 64">https://doi.org/10.1021/a csami.9b144 64</a> |
| 743. | PBDB-T     | i-IEICO-4F | 11.000 | 19.100 | 0.606 | 0.920 | <a href="https://doi.org/10.1021/a csami.9b125 22">https://doi.org/10.1021/a csami.9b125 22</a> |
| 744. | PBDB-T-2Cl | IT-4F      | 12.960 | 18.840 | 0.745 | 0.881 | <a href="https://doi.org/10.1021/a csami.9b164 04">https://doi.org/10.1021/a csami.9b164 04</a> |
| 745. | PBDT-BZ    | BDTB-Ph    | 10.590 | 17.520 | 0.645 | 0.918 | <a href="https://doi.org/10.1021/a csami.9b149 81">https://doi.org/10.1021/a csami.9b149 81</a> |
| 746. | PBDT-BZ    | BDTB-Na    | 10.140 | 17.660 | 0.626 | 0.888 | <a href="https://doi.org/10.1021/a csami.9b149 81">https://doi.org/10.1021/a csami.9b149 81</a> |
| 747. | PBDT-BZ    | TBDB-Ph    | 4.040  | 9.810  | 0.428 | 0.921 | <a href="https://doi.org/10.1021/a csami.9b149 81">https://doi.org/10.1021/a csami.9b149 81</a> |
| 748. | PBDT-BZ    | TBDB-Na    | 6.320  | 13.020 | 0.516 | 0.903 | <a href="https://doi.org/10.1021/a csami.9b149 81">https://doi.org/10.1021/a csami.9b149 81</a> |
| 749. | PTBD-BZ    | BDTB-Ph    | 9.260  | 16.540 | 0.585 | 0.926 | <a href="https://doi.org/10.1021/a csami.9b149 81">https://doi.org/10.1021/a csami.9b149 81</a> |
| 750. | PTBD-BZ    | BDTB-Na    | 10.030 | 18.250 | 0.610 | 0.875 | <a href="https://doi.org/10.1021/a csami.9b149 81">https://doi.org/10.1021/a csami.9b149 81</a> |
| 751. | PTBD-BZ    | TBDB-Ph    | 11.060 | 17.940 | 0.650 | 0.923 | <a href="https://doi.org/10.1021/a csami.9b149 81">https://doi.org/10.1021/a csami.9b149 81</a> |
| 752. | PTBD-BZ    | TBDB-Na    | 12.470 | 19.500 | 0.692 | 0.905 | <a href="https://doi.org/10.1021/a csami.9b149 81">https://doi.org/10.1021/a csami.9b149 81</a> |
| 753. | PDTBDT-BZ  | BDTB-Ph    | 6.500  | 13.200 | 0.539 | 0.883 | <a href="https://doi.org/10.1021/a csami.9b149 81">https://doi.org/10.1021/a csami.9b149 81</a> |
| 754. | PDTBDT-BZ  | TBDB-Ph    | 6.200  | 13.180 | 0.505 | 0.911 | <a href="https://doi.org/10.1021/a csami.9b149 81">https://doi.org/10.1021/a csami.9b149 81</a> |

|      |                   |                           |        |        |       |       |                                                                                                               |
|------|-------------------|---------------------------|--------|--------|-------|-------|---------------------------------------------------------------------------------------------------------------|
| 755. | PDTBDT-BZ         | TBDB-Na                   | 5.380  | 11.080 | 0.528 | 0.878 | <a href="https://doi.org/10.1021/a csami.9b149 81">https://doi.org/10.1021/a csami.9b149 81</a>               |
| 756. | PBDB-T            | ITIC                      | 9.300  | 15.700 | 0.660 | 0.880 | <a href="https://doi.org/10.1021/a csami.9b157 53">https://doi.org/10.1021/a csami.9b157 53</a>               |
| 757. | PBDB-T            | N220                      | 10.700 | 16.900 | 0.690 | 0.900 | <a href="https://doi.org/10.1021/a csami.9b157 53">https://doi.org/10.1021/a csami.9b157 53</a>               |
| 758. | PTB7-Th           | P-1                       | 3.820  | 9.430  | 0.532 | 0.780 | <a href="https://doi.org/10.1021/a csami.9b159 75">https://doi.org/10.1021/a csami.9b159 75</a>               |
| 759. | PTB7-Th           | P-2                       | 6.980  | 13.500 | 0.648 | 0.800 | <a href="https://doi.org/10.1021/a csami.9b159 75">https://doi.org/10.1021/a csami.9b159 75</a>               |
| 760. | PTB7-Th           | P-3                       | 5.480  | 12.070 | 0.567 | 0.770 | <a href="https://doi.org/10.1021/a csami.9b159 75">https://doi.org/10.1021/a csami.9b159 75</a>               |
| 761. | PBDB-T            | FDTBT-<br>IDTT-<br>FINCN  | 7.270  | 13.180 | 0.610 | 0.850 | <a href="https://doi.org/10.1021/a csami.9b152 47">https://doi.org/10.1021/a csami.9b152 47</a>               |
| 762. | PBDB-T            | CNDTBT-<br>IDTT-<br>FINCN | 9.130  | 16.690 | 0.640 | 0.810 | <a href="https://doi.org/10.1021/a csami.9b152 47">https://doi.org/10.1021/a csami.9b152 47</a>               |
| 763. | PBDB-T            | m-INPOIC                  | 12.800 | 20.700 | 0.708 | 0.850 | <a href="https://doi.org/10.1021/a csenergylett. 9b01630">https://doi.org/10.1021/a csenergylett. 9b01630</a> |
| 764. | PFT-EHp           | Y6                        | 14.160 | 25.010 | 0.712 | 0.780 | <a href="https://doi.org/10.1021/a csenergylett. 9b01447">https://doi.org/10.1021/a csenergylett. 9b01447</a> |
| 765. | PCT-EHp           | Y6                        | 15.060 | 25.700 | 0.727 | 0.790 | <a href="https://doi.org/10.1021/a csenergylett. 9b01447">https://doi.org/10.1021/a csenergylett. 9b01447</a> |
| 766. | P2F-EHp           | Y6                        | 15.650 | 26.110 | 0.733 | 0.810 | <a href="https://doi.org/10.1021/a csenergylett. 9b01447">https://doi.org/10.1021/a csenergylett. 9b01447</a> |
| 767. | PE61              | Y6                        | 8.610  | 23.410 | 0.553 | 0.660 | <a href="https://doi.org/10.1021/a csmacrolett. 9b00368">https://doi.org/10.1021/a csmacrolett. 9b00368</a>   |
| 768. | PE62              | Y6                        | 12.020 | 24.640 | 0.622 | 0.780 | <a href="https://doi.org/10.1021/a csmacrolett. 9b00368">https://doi.org/10.1021/a csmacrolett. 9b00368</a>   |
| 769. | PE63              | Y6                        | 13.100 | 24.680 | 0.637 | 0.830 | <a href="https://doi.org/10.1021/a csmacrolett. 9b00368">https://doi.org/10.1021/a csmacrolett. 9b00368</a>   |
| 770. | PIDTT-<br>DTffBTA | Y6                        | 11.050 | 22.440 | 0.646 | 0.730 | <a href="https://doi.org/10.1021/a csmacrolett. 9b00704">https://doi.org/10.1021/a csmacrolett. 9b00704</a>   |

|      |            |          |        |        |       |       |                                                                                                         |
|------|------------|----------|--------|--------|-------|-------|---------------------------------------------------------------------------------------------------------|
| 771. | J52        | Y6       | 7.150  | 20.430 | 0.516 | 0.650 | <a href="https://doi.org/10.1021/acsmacrolett.9b00704">https://doi.org/10.1021/acsmacrolett.9b00704</a> |
| 772. | PDTPO-BDTT | IT-4F    | 10.960 | 18.940 | 0.683 | 0.810 | <a href="https://doi.org/10.1021/acsomega.9b01363">https://doi.org/10.1021/acsomega.9b01363</a>         |
| 773. | PDTPO-BDTT | NNFA-4F  | 10.040 | 18.720 | 0.623 | 0.830 | <a href="https://doi.org/10.1021/acsomega.9b01363">https://doi.org/10.1021/acsomega.9b01363</a>         |
| 774. | PDTPO-BDTT | COi8DFIC | 6.460  | 16.260 | 0.465 | 0.810 | <a href="https://doi.org/10.1021/acsomega.9b01363">https://doi.org/10.1021/acsomega.9b01363</a>         |
| 775. | PBDB-T     | ITIC     | 9.950  | 15.400 | 0.710 | 0.880 | <a href="https://doi.org/10.1002/enm.201900887">https://doi.org/10.1002/enm.201900887</a>               |
| 776. | PBDB-T     | ITIC     | 12.180 | 18.620 | 0.720 | 0.870 | <a href="https://doi.org/10.1002/enm.201900887">https://doi.org/10.1002/enm.201900887</a>               |
| 777. | PBDB-T     | IT-4F    | 10.100 | 20.020 | 0.706 | 0.710 | <a href="https://doi.org/10.1002/enm.201901823">https://doi.org/10.1002/enm.201901823</a>               |
| 778. | PBDB-T     | ITIC     | 10.300 | 17.100 | 0.686 | 0.878 | <a href="https://doi.org/10.1002/enm.201902065">https://doi.org/10.1002/enm.201902065</a>               |
| 779. | PBDB-T     | F-Cl     | 10.810 | 17.080 | 0.740 | 0.860 | <a href="https://doi.org/10.1002/aenm.201902688">https://doi.org/10.1002/aenm.201902688</a>             |
| 780. | PBDB-T     | F-2Cl    | 10.340 | 17.520 | 0.740 | 0.801 | <a href="https://doi.org/10.1002/aenm.201902688">https://doi.org/10.1002/aenm.201902688</a>             |
| 781. | PM6        | F-Cl     | 12.500 | 16.430 | 0.770 | 0.982 | <a href="https://doi.org/10.1002/aenm.201902688">https://doi.org/10.1002/aenm.201902688</a>             |
| 782. | PM6        | F-2Cl    | 12.830 | 18.080 | 0.770 | 0.916 | <a href="https://doi.org/10.1002/aenm.201902688">https://doi.org/10.1002/aenm.201902688</a>             |
| 783. | PBDB-T-SF  | IT-4F    | 13.100 | 19.400 | 0.720 | 0.900 | <a href="https://doi.org/10.1002/adma.201902965">https://doi.org/10.1002/adma.201902965</a>             |
| 784. | PBDB-T-2F  | Y6       | 15.300 | 24.800 | 0.720 | 0.850 | <a href="https://doi.org/10.1002/adma.201902965">https://doi.org/10.1002/adma.201902965</a>             |
| 785. | PBDB-T     | Y1       | 13.400 | 21.400 | 0.695 | 0.880 | <a href="https://doi.org/10.1002/adma.201904215">https://doi.org/10.1002/adma.201904215</a>             |
| 786. | PBDB-T     | Y1-4F    | 9.900  | 22.700 | 0.574 | 0.740 | <a href="https://doi.org/10.1002/adma.201904215">https://doi.org/10.1002/adma.201904215</a>             |

|      |              |          |        |        |       |       |                                                                                             |
|------|--------------|----------|--------|--------|-------|-------|---------------------------------------------------------------------------------------------|
| 787. | PBDB-T-F     | Y1       | 7.100  | 12.900 | 0.555 | 0.920 | <a href="https://doi.org/10.1002/adma.201904215">https://doi.org/10.1002/adma.201904215</a> |
| 788. | PBDB-T-F     | Y1-4F    | 14.800 | 25.200 | 0.685 | 0.830 | <a href="https://doi.org/10.1002/adma.201904215">https://doi.org/10.1002/adma.201904215</a> |
| 789. | PM6          | Y6       | 16.000 | 25.500 | 0.740 | 0.840 | <a href="https://doi.org/10.1002/adma.201905645">https://doi.org/10.1002/adma.201905645</a> |
| 790. | PM6          | 3TP3T-4F | 13.900 | 20.300 | 0.739 | 0.920 | <a href="https://doi.org/10.1002/adma.201905645">https://doi.org/10.1002/adma.201905645</a> |
| 791. | PM6          | 3TP3T-IC | 9.000  | 13.000 | 0.656 | 1.050 | <a href="https://doi.org/10.1002/adma.201905645">https://doi.org/10.1002/adma.201905645</a> |
| 792. | P3HT         | TrBIC    | 6.620  | 11.750 | 0.624 | 0.860 | <a href="https://doi.org/10.1002/adma.201906045">https://doi.org/10.1002/adma.201906045</a> |
| 793. | FTAZ         | ITIC-Th  | 9.530  | 16.800 | 0.626 | 0.907 | <a href="https://doi.org/10.1002/dvs.201801560">https://doi.org/10.1002/dvs.201801560</a>   |
| 794. | FTAZ         | ITIC-Th  | 9.040  | 16.400 | 0.627 | 0.879 | <a href="https://doi.org/10.1002/dvs.201801560">https://doi.org/10.1002/dvs.201801560</a>   |
| 795. | FTAZ         | ITIC-Th  | 10.440 | 17.820 | 0.663 | 0.884 | <a href="https://doi.org/10.1002/dvs.201801560">https://doi.org/10.1002/dvs.201801560</a>   |
| 796. | PBDT(T)[2F]T | ITIC     | 9.100  | 15.700 | 0.620 | 0.940 | <a href="https://doi.org/10.1002/dvs.201802028">https://doi.org/10.1002/dvs.201802028</a>   |
| 797. | PBDB-T       | ITIC     | 10.000 | 16.800 | 0.680 | 0.870 | <a href="https://doi.org/10.1002/dvs.201802028">https://doi.org/10.1002/dvs.201802028</a>   |
| 798. | PBDB-T-SF    | IT-4F    | 11.700 | 19.400 | 0.670 | 0.895 | <a href="https://doi.org/10.1002/dvs.201802028">https://doi.org/10.1002/dvs.201802028</a>   |
| 799. | PTB7-Th      | ITIC-Th  | 8.250  | 14.590 | 0.695 | 0.800 | <a href="https://doi.org/10.1002/dvs.201901773">https://doi.org/10.1002/dvs.201901773</a>   |
| 800. | P1           | ITIC-Th  | 11.390 | 17.660 | 0.631 | 1.010 | <a href="https://doi.org/10.1002/dvs.201901773">https://doi.org/10.1002/dvs.201901773</a>   |
| 801. | PTB7-Th      | IEICO-4F | 9.790  | 21.920 | 0.605 | 0.730 | <a href="https://doi.org/10.1002/dvs.201901773">https://doi.org/10.1002/dvs.201901773</a>   |
| 802. | P1           | IEICO-4F | 1.310  | 4.200  | 0.367 | 0.810 | <a href="https://doi.org/10.1002/dvs.201901773">https://doi.org/10.1002/dvs.201901773</a>   |

|      |               |            |        |        |       |       |                                                                                                           |
|------|---------------|------------|--------|--------|-------|-------|-----------------------------------------------------------------------------------------------------------|
| 803. | P(NDI2OD-T2   | ITIC       | 6.440  | 14.770 | 0.540 | 0.810 | <a href="https://doi.org/10.1021/acs.chemmater.9b03333">https://doi.org/10.1021/acs.chemmater.9b03333</a> |
| 804. | J71           | HCN-C8     | 2.380  | 5.810  | 0.376 | 1.010 | <a href="https://doi.org/10.1021/acs.chemmater.9b02355">https://doi.org/10.1021/acs.chemmater.9b02355</a> |
| 805. | J71           | HCN-C16    | 5.510  | 12.080 | 0.421 | 1.030 | <a href="https://doi.org/10.1021/acs.chemmater.9b02355">https://doi.org/10.1021/acs.chemmater.9b02355</a> |
| 806. | J71           | H2FCN-C16  | 11.180 | 18.640 | 0.662 | 0.900 | <a href="https://doi.org/10.1021/acs.chemmater.9b02355">https://doi.org/10.1021/acs.chemmater.9b02355</a> |
| 807. | PBDB-TF       | C8-ITCC    | 10.800 | 16.100 | 0.630 | 1.040 | <a href="https://doi.org/10.1021/acs.chemmater.9b00980">https://doi.org/10.1021/acs.chemmater.9b00980</a> |
| 808. | PBDB-TF       | C8-ITCC-Cl | 12.700 | 17.900 | 0.730 | 0.950 | <a href="https://doi.org/10.1021/acs.chemmater.9b00980">https://doi.org/10.1021/acs.chemmater.9b00980</a> |
| 809. | PBDB-T-2F     | SRID-4F    | 13.050 | 20.290 | 0.747 | 0.843 | <a href="https://doi.org/10.1021/acs.chemmater.9b01242">https://doi.org/10.1021/acs.chemmater.9b01242</a> |
| 810. | PBDB-T-2F     | TRID-4F    | 12.330 | 18.370 | 0.739 | 0.873 | <a href="https://doi.org/10.1021/acs.chemmater.9b01242">https://doi.org/10.1021/acs.chemmater.9b01242</a> |
| 811. | PBDB-T-2F     | IT-4F      | 12.630 | 19.190 | 0.752 | 0.862 | <a href="https://doi.org/10.1021/acs.chemmater.9b01242">https://doi.org/10.1021/acs.chemmater.9b01242</a> |
| 812. | PM6           | IN-4F      | 13.000 | 21.300 | 0.687 | 0.870 | <a href="https://doi.org/10.1021/acs.chemmater.9b02943">https://doi.org/10.1021/acs.chemmater.9b02943</a> |
| 813. | PM6           | IT-4F      | 13.100 | 20.600 | 0.749 | 0.835 | <a href="https://doi.org/10.1021/acs.chemmater.9b02943">https://doi.org/10.1021/acs.chemmater.9b02943</a> |
| 814. | PM6           | Y6         | 15.500 | 24.700 | 0.736 | 0.837 | <a href="https://doi.org/10.1021/acs.chemmater.9b02943">https://doi.org/10.1021/acs.chemmater.9b02943</a> |
| 815. | T2-BTDF-(TE2) | ITIC       | 2.930  | 5.800  | 0.520 | 0.980 | <a href="https://doi.org/10.1021/acs.chemmater.9b03327">https://doi.org/10.1021/acs.chemmater.9b03327</a> |
| 816. | TE2-BTDF-(T2) | ITIC       | 2.300  | 4.400  | 0.550 | 1.000 | <a href="https://doi.org/10.1021/acs.chemmater.9b03327">https://doi.org/10.1021/acs.chemmater.9b03327</a> |
| 817. | T2-BTDF-(TE2) | ITIC-4F    | 3.610  | 6.700  | 0.680 | 0.800 | <a href="https://doi.org/10.1021/acs.chemmater.9b03327">https://doi.org/10.1021/acs.chemmater.9b03327</a> |
| 818. | TE2-BTDF-(T2) | ITIC-4f    | 6.690  | 11.100 | 0.700 | 0.860 | <a href="https://doi.org/10.1021/acs.chemmater.9b03327">https://doi.org/10.1021/acs.chemmater.9b03327</a> |

|      |           |           |        |        |       |       |                                                                                                           |
|------|-----------|-----------|--------|--------|-------|-------|-----------------------------------------------------------------------------------------------------------|
| 819. | PBDB-T    | ITIC      | 9.400  | 16.870 | 0.628 | 0.887 | <a href="https://doi.org/10.1021/acs.chemmater.9b03935">https://doi.org/10.1021/acs.chemmater.9b03935</a> |
| 820. | PDCBT     | ITIC      | 8.820  | 16.440 | 0.578 | 0.928 | <a href="https://doi.org/10.1021/acs.chemmater.9b03935">https://doi.org/10.1021/acs.chemmater.9b03935</a> |
| 821. | PM7       | ITC-2Cl   | 13.720 | 19.640 | 0.739 | 0.915 | <a href="https://doi.org/10.1039/C9EE01030K">https://doi.org/10.1039/C9EE01030K</a>                       |
| 822. | PM7       | IXIC-4Cl  | 12.010 | 21.190 | 0.699 | 0.795 | <a href="https://doi.org/10.1039/C9EE01030K">https://doi.org/10.1039/C9EE01030K</a>                       |
| 823. | PTB7-Th   | F5IC      | 5.610  | 13.430 | 0.621 | 0.641 | <a href="https://doi.org/10.1021/jacs.9b08988">https://doi.org/10.1021/jacs.9b08988</a>                   |
| 824. | PTB7-Th   | AOIC      | 13.700 | 24.320 | 0.743 | 0.742 | <a href="https://doi.org/10.1021/jacs.9b08988">https://doi.org/10.1021/jacs.9b08988</a>                   |
| 825. | PTB7-Th   | IUIC2     | 4.480  | 10.770 | 0.515 | 0.758 | <a href="https://doi.org/10.1021/jacs.9b08988">https://doi.org/10.1021/jacs.9b08988</a>                   |
| 826. | PBDB-T-2F | HBDT-4Cl  | 10.350 | 17.600 | 0.641 | 0.899 | <a href="https://doi.org/10.1039/C9TA06311K">https://doi.org/10.1039/C9TA06311K</a>                       |
| 827. | PBDB-T-2F | FBDT-4Cl  | 12.360 | 19.510 | 0.700 | 0.884 | <a href="https://doi.org/10.1039/C9TA06311K">https://doi.org/10.1039/C9TA06311K</a>                       |
| 828. | PBDB-T-2F | CIBDT-4Cl | 11.650 | 18.980 | 0.677 | 0.875 | <a href="https://doi.org/10.1039/C9TA06311K">https://doi.org/10.1039/C9TA06311K</a>                       |
| 829. | P3HT      | ITIC      | 1.500  | 5.200  | 0.522 | 0.550 | <a href="https://doi.org/10.1039/C9TA07361B">https://doi.org/10.1039/C9TA07361B</a>                       |
| 830. | P3HT      | ITIC-M    | 2.300  | 9.800  | 0.525 | 0.450 | <a href="https://doi.org/10.1039/C9TA07361B">https://doi.org/10.1039/C9TA07361B</a>                       |
| 831. | P3HT      | O-IDTBR   | 5.600  | 12.400 | 0.616 | 0.740 | <a href="https://doi.org/10.1039/C9TA07361B">https://doi.org/10.1039/C9TA07361B</a>                       |
| 832. | P3HT      | EH-IDTBR  | 3.300  | 7.700  | 0.577 | 0.740 | <a href="https://doi.org/10.1039/C9TA07361B">https://doi.org/10.1039/C9TA07361B</a>                       |
| 833. | P3HT      | O-IDFBR   | 4.200  | 6.900  | 0.675 | 0.900 | <a href="https://doi.org/10.1039/C9TA07361B">https://doi.org/10.1039/C9TA07361B</a>                       |
| 834. | PBDB-T    | CZTT-IC   | 9.870  | 17.150 | 0.583 | 0.970 | <a href="https://doi.org/10.1039/C9TA08573D">https://doi.org/10.1039/C9TA08573D</a>                       |
| 835. | PM6       | CZTT-IC   | 7.020  | 12.650 | 0.505 | 1.070 | <a href="https://doi.org/10.1039/C9TA08573D">https://doi.org/10.1039/C9TA08573D</a>                       |
| 836. | PBDB-T    | CZTT-4F   | 9.810  | 18.780 | 0.581 | 0.890 | <a href="https://doi.org/10.1039/C9TA08573D">https://doi.org/10.1039/C9TA08573D</a>                       |



|      |           |          |        |        |       |       |                                                                                     |
|------|-----------|----------|--------|--------|-------|-------|-------------------------------------------------------------------------------------|
| 837. | PM6       | CZTT-4F  | 12.070 | 19.860 | 0.650 | 0.950 | <a href="https://doi.org/10.1039/C9TA08573D">https://doi.org/10.1039/C9TA08573D</a> |
| 838. | PTB7-Th   | EH-IDTBR | 10.070 | 15.250 | 0.620 | 1.020 | <a href="https://doi.org/10.1039/C9TA07919J">https://doi.org/10.1039/C9TA07919J</a> |
| 839. | PTB7-Th   | T2-ORH   | 9.390  | 14.430 | 0.580 | 1.060 | <a href="https://doi.org/10.1039/C9TA07919J">https://doi.org/10.1039/C9TA07919J</a> |
| 840. | PM6       | BP-4F    | 10.900 | 19.800 | 0.590 | 0.910 | <a href="https://doi.org/10.1039/C9TA08636F">https://doi.org/10.1039/C9TA08636F</a> |
| 841. | PM6       | BP-4F    | 13.900 | 21.600 | 0.720 | 0.890 | <a href="https://doi.org/10.1039/C9TA08636F">https://doi.org/10.1039/C9TA08636F</a> |
| 842. | PM6       | TTTIC    | 10.510 | 17.320 | 0.627 | 0.940 | <a href="https://doi.org/10.1039/C9TA08328F">https://doi.org/10.1039/C9TA08328F</a> |
| 843. | PM6       | TTTIC    | 12.050 | 18.170 | 0.693 | 0.930 | <a href="https://doi.org/10.1039/C9TA08328F">https://doi.org/10.1039/C9TA08328F</a> |
| 844. | PM6       | TSeTIC   | 11.190 | 18.130 | 0.643 | 0.930 | <a href="https://doi.org/10.1039/C9TA08328F">https://doi.org/10.1039/C9TA08328F</a> |
| 845. | PM6       | TSeTIC   | 13.710 | 19.310 | 0.751 | 0.920 | <a href="https://doi.org/10.1039/C9TA08328F">https://doi.org/10.1039/C9TA08328F</a> |
| 846. | PTQ10     | IT-4Cl   | 12.120 | 19.330 | 0.705 | 0.890 | <a href="https://doi.org/10.1039/C9TA10887D">https://doi.org/10.1039/C9TA10887D</a> |
| 847. | PTQ10     | IT-4Cl   | 13.040 | 19.610 | 0.730 | 0.910 | <a href="https://doi.org/10.1039/C9TA10887D">https://doi.org/10.1039/C9TA10887D</a> |
| 848. | PBDB-T    | BTOPIC   | 9.310  | 14.830 | 0.695 | 0.880 | <a href="https://doi.org/10.1039/C9TC01214A">https://doi.org/10.1039/C9TC01214A</a> |
| 849. | PBDB-T    | BT-IC    | 10.760 | 17.720 | 0.701 | 0.850 | <a href="https://doi.org/10.1039/C9TC01214A">https://doi.org/10.1039/C9TC01214A</a> |
| 850. | PBDB-T    | ITIC     | 10.200 | 16.770 | 0.688 | 0.870 | <a href="https://doi.org/10.1039/C9TC02781E">https://doi.org/10.1039/C9TC02781E</a> |
| 851. | PBDD-CH   | ITIC     | 6.150  | 10.990 | 0.528 | 0.980 | <a href="https://doi.org/10.1039/C9TC02663K">https://doi.org/10.1039/C9TC02663K</a> |
| 852. | PBDD-CH   | ITIC     | 8.210  | 13.640 | 0.602 | 0.950 | <a href="https://doi.org/10.1039/C9TC02663K">https://doi.org/10.1039/C9TC02663K</a> |
| 853. | PBDD-CH-S | ITIC     | 8.960  | 14.530 | 0.614 | 0.980 | <a href="https://doi.org/10.1039/C9TC02663K">https://doi.org/10.1039/C9TC02663K</a> |
| 854. | PBDD-CH-S | ITIC     | 9.630  | 14.730 | 0.658 | 0.960 | <a href="https://doi.org/10.1039/C9TC02663K">https://doi.org/10.1039/C9TC02663K</a> |

|      |           |         |        |        |       |       |                                                                                                         |
|------|-----------|---------|--------|--------|-------|-------|---------------------------------------------------------------------------------------------------------|
| 855. | PM7       | ITC6-IC | 5.850  | 11.580 | 0.474 | 1.019 | <a href="https://doi.org/10.1039/C9TC04798K">https://doi.org/10.1039/C9TC04798K</a>                     |
| 856. | PM7       | ITC6-IC | 8.210  | 13.480 | 0.587 | 1.009 | <a href="https://doi.org/10.1039/C9TC04798K">https://doi.org/10.1039/C9TC04798K</a>                     |
| 857. | PM7       | IT-4F   | 10.240 | 18.030 | 0.633 | 0.880 | <a href="https://doi.org/10.1039/C9TC04798K">https://doi.org/10.1039/C9TC04798K</a>                     |
| 858. | PM7       | IT-4F   | 12.480 | 20.080 | 0.706 | 0.858 | <a href="https://doi.org/10.1039/C9TC04798K">https://doi.org/10.1039/C9TC04798K</a>                     |
| 859. | PM7       | ITC6-4F | 12.100 | 19.620 | 0.635 | 0.960 | <a href="https://doi.org/10.1039/C9TC04798K">https://doi.org/10.1039/C9TC04798K</a>                     |
| 860. | PM7       | ITC6-4F | 14.470 | 21.870 | 0.729 | 0.898 | <a href="https://doi.org/10.1039/C9TC04798K">https://doi.org/10.1039/C9TC04798K</a>                     |
| 861. | PBDB-T    | ITIC    | 9.700  | 15.500 | 0.714 | 0.880 | <a href="https://doi.org/10.1039/C9TC05301H">https://doi.org/10.1039/C9TC05301H</a>                     |
| 862. | PBDB-T-2F | BTP-4F  | 15.400 | 25.200 | 0.770 | 0.800 | <a href="https://doi.org/10.1039/C9TC05301H">https://doi.org/10.1039/C9TC05301H</a>                     |
| 863. | PBDB-T    | ITIC    | 11.150 | 16.800 | 0.725 | 0.916 | <a href="https://doi.org/10.1021/acs.jpcc.9b03515">https://doi.org/10.1021/acs.jpcc.9b03515</a>         |
| 864. | PBDB-T    | IT-T-IC | 6.330  | 11.580 | 0.525 | 0.986 | <a href="https://doi.org/10.1002/marc.201900353">https://doi.org/10.1002/marc.201900353</a>             |
| 865. | PBDB-T    | ITCT    | 11.270 | 17.880 | 0.723 | 0.850 | <a href="https://doi.org/10.1002/marc.201900353">https://doi.org/10.1002/marc.201900353</a>             |
| 866. | PDB-1     | IT-4F   | 0.210  | 0.850  | 0.200 | 1.000 | <a href="https://doi.org/10.1021/acs.macromol.9b01742">https://doi.org/10.1021/acs.macromol.9b01742</a> |
| 867. | PDB-1     | IT-4F   | 5.680  | 11.500 | 0.460 | 0.890 | <a href="https://doi.org/10.1021/acs.macromol.9b01742">https://doi.org/10.1021/acs.macromol.9b01742</a> |
| 868. | PDB-2     | IT-4F   | 2.120  | 7.410  | 0.200 | 0.900 | <a href="https://doi.org/10.1021/acs.macromol.9b01742">https://doi.org/10.1021/acs.macromol.9b01742</a> |
| 869. | PDB-2     | IT-4F   | 11.820 | 18.510 | 0.630 | 0.890 | <a href="https://doi.org/10.1021/acs.macromol.9b01742">https://doi.org/10.1021/acs.macromol.9b01742</a> |
| 870. | PDB-3     | IT-4F   | 8.870  | 16.120 | 0.510 | 0.900 | <a href="https://doi.org/10.1021/acs.macromol.9b01742">https://doi.org/10.1021/acs.macromol.9b01742</a> |
| 871. | PDB-3     | IT-4F   | 11.190 | 17.710 | 0.700 | 0.850 | <a href="https://doi.org/10.1021/acs.macromol.9b01742">https://doi.org/10.1021/acs.macromol.9b01742</a> |

|      |             |            |        |        |       |       |                                                                                                         |
|------|-------------|------------|--------|--------|-------|-------|---------------------------------------------------------------------------------------------------------|
| 872. | PTB7-Th     | COi6-2Cl-d | 8.410  | 20.290 | 0.599 | 0.670 | <a href="https://doi.org/10.1039/C9QM00327D">https://doi.org/10.1039/C9QM00327D</a>                     |
| 873. | PTB7-Th     | COi6-2Cl-m | 9.220  | 20.440 | 0.631 | 0.690 | <a href="https://doi.org/10.1039/C9QM00327D">https://doi.org/10.1039/C9QM00327D</a>                     |
| 874. | PTB7-Th     | COi6-2Cl-g | 8.820  | 20.030 | 0.613 | 0.690 | <a href="https://doi.org/10.1039/C9QM00327D">https://doi.org/10.1039/C9QM00327D</a>                     |
| 875. | PPN4T-2F    | IT-4F      | 6.660  | 13.320 | 0.571 | 0.870 | <a href="https://doi.org/10.1039/C9QM00622B">https://doi.org/10.1039/C9QM00622B</a>                     |
| 876. | PPN4T-2F    | IT-4F      | 8.540  | 16.150 | 0.642 | 0.820 | <a href="https://doi.org/10.1039/C9QM00622B">https://doi.org/10.1039/C9QM00622B</a>                     |
| 877. | PBDB-T      | IEICF-DMOT | 13.010 | 21.980 | 0.662 | 0.870 | <a href="https://doi.org/10.1016/j.nanoen.2019.103934">https://doi.org/10.1016/j.nanoen.2019.103934</a> |
| 878. | PBDB-T      | IEICO-4F   | 9.980  | 22.870 | 0.573 | 0.740 | <a href="https://doi.org/10.1016/j.nanoen.2019.103934">https://doi.org/10.1016/j.nanoen.2019.103934</a> |
| 879. | PM6         | DPBDT-4Cl  | 11.400 | 18.700 | 0.650 | 0.890 | <a href="https://doi.org/10.1016/j.nanoen.2019.104209">https://doi.org/10.1016/j.nanoen.2019.104209</a> |
| 880. | PM6         | POBDT-4Cl  | 12.600 | 20.700 | 0.670 | 0.870 | <a href="https://doi.org/10.1016/j.nanoen.2019.104209">https://doi.org/10.1016/j.nanoen.2019.104209</a> |
| 881. | PM6         | COBDT-4Cl  | 13.500 | 21.600 | 0.700 | 0.860 | <a href="https://doi.org/10.1016/j.nanoen.2019.104209">https://doi.org/10.1016/j.nanoen.2019.104209</a> |
| 882. | PBDB-T      | IT-M       | 9.790  | 14.900 | 0.703 | 0.934 | <a href="https://doi.org/10.1016/j.orgel.2019.02.015">https://doi.org/10.1016/j.orgel.2019.02.015</a>   |
| 883. | PBDB-T      | IT-M       | 8.970  | 15.930 | 0.606 | 0.929 | <a href="https://doi.org/10.1016/j.orgel.2019.02.015">https://doi.org/10.1016/j.orgel.2019.02.015</a>   |
| 884. | PTB7-Th     | O-IDTBR    | 9.740  | 14.250 | 0.664 | 1.030 | <a href="https://doi.org/10.1016/j.orgel.2019.03.030">https://doi.org/10.1016/j.orgel.2019.03.030</a>   |
| 885. | PBDB-T      | O-IDTBR    | 6.990  | 10.800 | 0.648 | 1.000 | <a href="https://doi.org/10.1016/j.orgel.2019.03.030">https://doi.org/10.1016/j.orgel.2019.03.030</a>   |
| 886. | J71         | ITIC       | 10.900 | 16.960 | 0.640 | 0.925 | <a href="https://doi.org/10.1016/j.orgel.2019.05.004">https://doi.org/10.1016/j.orgel.2019.05.004</a>   |
| 887. | PBDTTFTQ-DO | ITIC       | 2.850  | 6.490  | 0.468 | 0.940 | <a href="https://doi.org/10.1016/j.orgel.2019.06.007">https://doi.org/10.1016/j.orgel.2019.06.007</a>   |

|      |             |          |        |        |       |       |                                                                                                                             |
|------|-------------|----------|--------|--------|-------|-------|-----------------------------------------------------------------------------------------------------------------------------|
| 888. | PBDTTFTQ-DO | ITIC-Th  | 2.760  | 6.650  | 0.424 | 0.980 | <a href="https://doi.org/10.1016/j.orgel.2019.06.007">https://doi.org/10.1016/j.orgel.2019.06.007</a>                       |
| 889. | PBDTTFTQ-DO | ITIC-Th  | 7.810  | 15.140 | 0.586 | 0.880 | <a href="https://doi.org/10.1016/j.orgel.2019.06.007">https://doi.org/10.1016/j.orgel.2019.06.007</a>                       |
| 890. | PBDTTFTQ-DO | ITIC-Th1 | 5.760  | 10.560 | 0.620 | 0.880 | <a href="https://doi.org/10.1016/j.orgel.2019.06.007">https://doi.org/10.1016/j.orgel.2019.06.007</a>                       |
| 891. | PBDTTFTQ-DO | ITIC-Th1 | 6.920  | 13.350 | 0.617 | 0.840 | <a href="https://doi.org/10.1016/j.orgel.2019.06.007">https://doi.org/10.1016/j.orgel.2019.06.007</a>                       |
| 892. | J11         | Y10      | 11.370 | 19.760 | 0.626 | 0.920 | <a href="https://doi.org/10.1039/C9CP05015A">https://doi.org/10.1039/C9CP05015A</a>                                         |
| 893. | J11         | Y10      | 13.460 | 21.210 | 0.716 | 0.890 | <a href="https://doi.org/10.1039/C9CP05015A">https://doi.org/10.1039/C9CP05015A</a>                                         |
| 894. | PTPTI-T-BDD | ITIC     | 2.730  | 7.440  | 0.371 | 0.950 | <a href="https://doi.org/10.1016/j.polymer.2019.12.1850">https://doi.org/10.1016/j.polymer.2019.12.1850</a>                 |
| 895. | PTPTI-T-FBT | ITIC     | 6.030  | 14.800 | 0.416 | 0.980 | <a href="https://doi.org/10.1016/j.polymer.2019.12.1850">https://doi.org/10.1016/j.polymer.2019.12.1850</a>                 |
| 896. | J52         | DBTIC    | 6.870  | 11.180 | 0.625 | 0.930 | <a href="https://doi.org/10.1016/j.polymer.2019.12.1976">https://doi.org/10.1016/j.polymer.2019.12.1976</a>                 |
| 897. | J52         | DBTIC    | 8.640  | 13.550 | 0.661 | 0.930 | <a href="https://doi.org/10.1016/j.polymer.2019.12.1976">https://doi.org/10.1016/j.polymer.2019.12.1976</a>                 |
| 898. | PBDT-TPD    | ITIC     | 3.920  | 10.760 | 0.400 | 0.900 | <a href="https://doi.org/10.1016/j.reactfunctpolym.2019.10.4378">https://doi.org/10.1016/j.reactfunctpolym.2019.10.4378</a> |
| 899. | PBDT-TPD    | ITIC     | 4.430  | 10.510 | 0.437 | 0.960 | <a href="https://doi.org/10.1016/j.reactfunctpolym.2019.10.4378">https://doi.org/10.1016/j.reactfunctpolym.2019.10.4378</a> |
| 900. | PBDTT-TPD   | ITIC     | 4.970  | 12.100 | 0.429 | 0.940 | <a href="https://doi.org/10.1016/j.reactfunctpolym.2019.10.4378">https://doi.org/10.1016/j.reactfunctpolym.2019.10.4378</a> |
| 901. | PBDTT-TPD   | ITIC     | 6.170  | 12.980 | 0.480 | 0.960 | <a href="https://doi.org/10.1016/j.reactfunctpolym.2019.10.4378">https://doi.org/10.1016/j.reactfunctpolym.2019.10.4378</a> |
| 902. | PBDT-TPD    | IDIC     | 4.360  | 10.040 | 0.481 | 0.880 | <a href="https://doi.org/10.1016/j.reactfunctpolym.2019.10.4378">https://doi.org/10.1016/j.reactfunctpolym.2019.10.4378</a> |

|      |           |         |        |        |       |       |                                                                                                                           |
|------|-----------|---------|--------|--------|-------|-------|---------------------------------------------------------------------------------------------------------------------------|
| 903. | PBDTT-TPD | IDIC    | 7.150  | 14.470 | 0.552 | 0.890 | <a href="https://doi.org/10.1016/j.reactfunctpolym.2019.104378">https://doi.org/10.1016/j.reactfunctpolym.2019.104378</a> |
| 904. | PBDB-T    | IDIC    | 8.470  | 15.620 | 0.684 | 0.790 | <a href="https://doi.org/10.1039/C9RA08092A">https://doi.org/10.1039/C9RA08092A</a>                                       |
| 905. | PBDB-T    | IDIC    | 9.190  | 17.350 | 0.680 | 0.770 | <a href="https://doi.org/10.1039/C9RA08092A">https://doi.org/10.1039/C9RA08092A</a>                                       |
| 906. | PBDB-T    | NDIC    | 7.920  | 13.350 | 0.683 | 0.870 | <a href="https://doi.org/10.1039/C9RA08092A">https://doi.org/10.1039/C9RA08092A</a>                                       |
| 907. | PBDB-T    | NDIC    | 9.430  | 15.100 | 0.696 | 0.900 | <a href="https://doi.org/10.1039/C9RA08092A">https://doi.org/10.1039/C9RA08092A</a>                                       |
| 908. | PTQ10     | IDIC    | 10.010 | 16.850 | 0.601 | 0.987 | <a href="https://doi.org/10.1021/acsami.9b22666">https://doi.org/10.1021/acsami.9b22666</a>                               |
| 909. | PTQ10     | IDIC    | 11.860 | 17.420 | 0.702 | 0.952 | <a href="https://doi.org/10.1021/acsami.9b22666">https://doi.org/10.1021/acsami.9b22666</a>                               |
| 910. | PTQ10     | ITIC    | 9.250  | 15.940 | 0.537 | 1.035 | <a href="https://doi.org/10.1021/acsami.9b22666">https://doi.org/10.1021/acsami.9b22666</a>                               |
| 911. | PTQ10     | ITIC    | 10.900 | 17.300 | 0.593 | 1.026 | <a href="https://doi.org/10.1021/acsami.9b22666">https://doi.org/10.1021/acsami.9b22666</a>                               |
| 912. | PTQ10     | IDTCN   | 7.400  | 13.900 | 0.540 | 0.980 | <a href="https://doi.org/10.1002/enm.201800856">https://doi.org/10.1002/enm.201800856</a>                                 |
| 913. | PTQ10     | IDTPC   | 12.200 | 17.500 | 0.746 | 0.930 | <a href="https://doi.org/10.1002/enm.201800856">https://doi.org/10.1002/enm.201800856</a>                                 |
| 914. | PTQ10     | ZITI-S  | 7.060  | 11.800 | 0.589 | 0.965 | <a href="https://doi.org/10.1002/enm.201903298">https://doi.org/10.1002/enm.201903298</a>                                 |
| 915. | PTQ10     | ZITI-N  | 10.690 | 16.970 | 0.647 | 0.958 | <a href="https://doi.org/10.1002/enm.201903298">https://doi.org/10.1002/enm.201903298</a>                                 |
| 916. | PTQ10     | IDIC    | 12.400 | 20.200 | 0.630 | 0.970 | <a href="https://doi.org/10.1002/enm.202001149">https://doi.org/10.1002/enm.202001149</a>                                 |
| 917. | PTQ10     | BTP-Ph  | 17.100 | 24.300 | 0.753 | 0.882 | <a href="https://doi.org/10.1002/enm.202100079">https://doi.org/10.1002/enm.202100079</a>                                 |
| 918. | PTQ10     | BTP-Th  | 16.800 | 24.800 | 0.747 | 0.872 | <a href="https://doi.org/10.1002/enm.202100079">https://doi.org/10.1002/enm.202100079</a>                                 |
| 919. | PTQ10     | BTP-C11 | 16.400 | 24.700 | 0.741 | 0.852 | <a href="https://doi.org/10.1002/enm.202100079">https://doi.org/10.1002/enm.202100079</a>                                 |

|      |          |            |        |        |       |       |                                                                                                             |
|------|----------|------------|--------|--------|-------|-------|-------------------------------------------------------------------------------------------------------------|
| 920. | PTQ7     | Y6         | 5.750  | 18.650 | 0.434 | 0.710 | <a href="https://doi.org/10.1002/adma.201905480">https://doi.org/10.1002/adma.201905480</a>                 |
| 921. | PTQ8     | Y6         | 0.900  | 3.110  | 0.325 | 0.890 | <a href="https://doi.org/10.1002/adma.201905480">https://doi.org/10.1002/adma.201905480</a>                 |
| 922. | PTQ9     | Y6         | 10.500 | 23.720 | 0.540 | 0.820 | <a href="https://doi.org/10.1002/adma.201905480">https://doi.org/10.1002/adma.201905480</a>                 |
| 923. | PTQ10    | Y6         | 16.210 | 24.810 | 0.751 | 0.870 | <a href="https://doi.org/10.1002/adma.201905480">https://doi.org/10.1002/adma.201905480</a>                 |
| 924. | PBNT-BDD | Y6-BO      | 16.100 | 25.400 | 0.710 | 0.870 | <a href="https://doi.org/10.1002/anie.202016265">https://doi.org/10.1002/anie.202016265</a>                 |
| 925. | PM6      | Y6-BO      | 16.000 | 25.800 | 0.740 | 0.830 | <a href="https://doi.org/10.1002/anie.202016265">https://doi.org/10.1002/anie.202016265</a>                 |
| 926. | PCTZ-B   | Y6         | 11.900 | 19.800 | 0.682 | 0.867 | <a href="https://doi.org/10.1021/acsc.chemmater.0c03720">https://doi.org/10.1021/acsc.chemmater.0c03720</a> |
| 927. | PCTZ-B   | Y6         | 12.900 | 21.700 | 0.691 | 0.850 | <a href="https://doi.org/10.1021/acsc.chemmater.0c03720">https://doi.org/10.1021/acsc.chemmater.0c03720</a> |
| 928. | PCTZ-B   | Y6         | 12.600 | 21.600 | 0.676 | 0.843 | <a href="https://doi.org/10.1021/acsc.chemmater.0c03720">https://doi.org/10.1021/acsc.chemmater.0c03720</a> |
| 929. | PCTZ-B   | Y6         | 12.000 | 20.800 | 0.665 | 0.841 | <a href="https://doi.org/10.1021/acsc.chemmater.0c03720">https://doi.org/10.1021/acsc.chemmater.0c03720</a> |
| 930. | PBDB-T   | TACIC      | 9.920  | 16.170 | 0.605 | 0.984 | <a href="https://doi.org/10.1039/C9SC06456G">https://doi.org/10.1039/C9SC06456G</a>                         |
| 931. | PBDB-T   | ITIC       | 9.710  | 15.810 | 0.683 | 0.880 | <a href="https://doi.org/10.1039/C9SC06456G">https://doi.org/10.1039/C9SC06456G</a>                         |
| 932. | PTQ10    | o-BTP-PhC6 | 16.000 | 22.500 | 0.743 | 0.920 | <a href="https://doi.org/10.1039/D0EE03506H">https://doi.org/10.1039/D0EE03506H</a>                         |
| 933. | PTQ10    | m-BTP-PhC6 | 17.700 | 24.800 | 0.774 | 0.878 | <a href="https://doi.org/10.1039/D0EE03506H">https://doi.org/10.1039/D0EE03506H</a>                         |
| 934. | PTQ10    | p-BTP-PhC6 | 17.100 | 24.300 | 0.753 | 0.882 | <a href="https://doi.org/10.1039/D0EE03506H">https://doi.org/10.1039/D0EE03506H</a>                         |
| 935. | J71      | ITC6-IC    | 11.320 | 18.350 | 0.658 | 0.938 | <a href="https://doi.org/10.1039/C8EE02560F">https://doi.org/10.1039/C8EE02560F</a>                         |
| 936. | PTQ10    | IDIC       | 11.750 | 18.710 | 0.669 | 0.939 | <a href="https://doi.org/10.1039/C8EE02560F">https://doi.org/10.1039/C8EE02560F</a>                         |

|      |         |         |        |        |       |       |                                                                                                     |
|------|---------|---------|--------|--------|-------|-------|-----------------------------------------------------------------------------------------------------|
| 937. | J71     | MeIC    | 10.570 | 18.370 | 0.634 | 0.908 | <a href="https://doi.org/10.1039/C8EE02560F">https://doi.org/10.1039/C8EE02560F</a>                 |
| 938. | J71     | ITCPTC  | 10.460 | 17.460 | 0.680 | 0.881 | <a href="https://doi.org/10.1039/C8EE02560F">https://doi.org/10.1039/C8EE02560F</a>                 |
| 939. | J71     | ITIC    | 10.950 | 18.060 | 0.658 | 0.930 | <a href="https://doi.org/10.1039/C8EE02560F">https://doi.org/10.1039/C8EE02560F</a>                 |
| 940. | PTQ10   | IDIC-2F | 13.010 | 19.090 | 0.749 | 0.910 | <a href="https://doi.org/10.1039/C9EE02433F">https://doi.org/10.1039/C9EE02433F</a>                 |
| 941. | PTQ10   | IDIC    | 12.440 | 17.430 | 0.743 | 0.960 | <a href="https://doi.org/10.1039/C9EE02433F">https://doi.org/10.1039/C9EE02433F</a>                 |
| 942. | PM6     | Y6      | 16.520 | 25.650 | 0.762 | 0.820 | <a href="https://doi.org/10.1039/C9EE02433F">https://doi.org/10.1039/C9EE02433F</a>                 |
| 943. | PTQ10   | DF-OCIC | 3.680  | 6.510  | 0.541 | 1.040 | <a href="https://doi.org/10.1021/jacs.8b12126">https://doi.org/10.1021/jacs.8b12126</a>             |
| 944. | PTQ10   | HC-PCIC | 10.420 | 15.990 | 0.680 | 0.940 | <a href="https://doi.org/10.1021/jacs.8b12126">https://doi.org/10.1021/jacs.8b12126</a>             |
| 945. | PBDB-TF | HC-PCIC | 11.750 | 18.130 | 0.721 | 0.890 | <a href="https://doi.org/10.1021/jacs.8b12126">https://doi.org/10.1021/jacs.8b12126</a>             |
| 946. | PBDB-T  | DF-OCIC | 8.430  | 15.280 | 0.619 | 0.890 | <a href="https://doi.org/10.1021/jacs.8b12126">https://doi.org/10.1021/jacs.8b12126</a>             |
| 947. | PBDB-T  | FO-PCIC | 8.320  | 15.020 | 0.611 | 0.900 | <a href="https://doi.org/10.1021/jacs.8b12126">https://doi.org/10.1021/jacs.8b12126</a>             |
| 948. | PBDB-T  | HC-PCIC | 9.030  | 17.530 | 0.691 | 0.730 | <a href="https://doi.org/10.1021/jacs.8b12126">https://doi.org/10.1021/jacs.8b12126</a>             |
| 949. | PTQ10   | TPT10   | 9.240  | 17.250 | 0.582 | 0.920 | <a href="https://doi.org/10.1021/jacs.9b09939">https://doi.org/10.1021/jacs.9b09939</a>             |
| 950. | PTQ11   | TPT10   | 16.320 | 24.790 | 0.748 | 0.880 | <a href="https://doi.org/10.1021/jacs.9b09939">https://doi.org/10.1021/jacs.9b09939</a>             |
| 951. | D18     | Y6      | 18.220 | 27.700 | 0.766 | 0.859 | <a href="https://doi.org/10.1016/j.scib.2020.01.001">https://doi.org/10.1016/j.scib.2020.01.001</a> |
| 952. | PTQ10   | TPTC    | 1.360  | 3.870  | 0.367 | 0.960 | <a href="https://doi.org/10.1039/C8TA05920A">https://doi.org/10.1039/C8TA05920A</a>                 |
| 953. | PTQ10   | TPTIC   | 3.830  | 10.380 | 0.388 | 0.950 | <a href="https://doi.org/10.1039/C8TA05920A">https://doi.org/10.1039/C8TA05920A</a>                 |
| 954. | PTQ10   | TPTIC   | 10.420 | 17.170 | 0.675 | 0.900 | <a href="https://doi.org/10.1039/C8TA05920A">https://doi.org/10.1039/C8TA05920A</a>                 |

|      |        |            |        |        |       |       |                                                                                                       |
|------|--------|------------|--------|--------|-------|-------|-------------------------------------------------------------------------------------------------------|
| 955. | PM6    | TPT10      | 13.550 | 21.230 | 0.686 | 0.877 | <a href="https://doi.org/10.1039/D0TA04941G">https://doi.org/10.1039/D0TA04941G</a>                   |
| 956. | PM6    | TPT10      | 16.260 | 23.910 | 0.730 | 0.899 | <a href="https://doi.org/10.1039/D0TA04941G">https://doi.org/10.1039/D0TA04941G</a>                   |
| 957. | PM6    | TPT10      | 15.180 | 23.730 | 0.695 | 0.877 | <a href="https://doi.org/10.1039/D0TA04941G">https://doi.org/10.1039/D0TA04941G</a>                   |
| 958. | PBDB-T | TPT10      | 10.860 | 22.030 | 0.621 | 0.754 | <a href="https://doi.org/10.1039/D0TA04941G">https://doi.org/10.1039/D0TA04941G</a>                   |
| 959. | PBDB-T | TPT10      | 13.410 | 23.730 | 0.688 | 0.783 | <a href="https://doi.org/10.1039/D0TA04941G">https://doi.org/10.1039/D0TA04941G</a>                   |
| 960. | PBDB-T | TPT10      | 12.600 | 21.530 | 0.683 | 0.813 | <a href="https://doi.org/10.1039/D0TA04941G">https://doi.org/10.1039/D0TA04941G</a>                   |
| 961. | PTQ10  | TPT10      | 9.210  | 15.230 | 0.638 | 0.883 | <a href="https://doi.org/10.1039/D0TA04941G">https://doi.org/10.1039/D0TA04941G</a>                   |
| 962. | PTQ10  | TPT10      | 13.140 | 21.150 | 0.662 | 0.890 | <a href="https://doi.org/10.1039/D0TA04941G">https://doi.org/10.1039/D0TA04941G</a>                   |
| 963. | PTQ10  | TPT10      | 12.370 | 19.730 | 0.668 | 0.873 | <a href="https://doi.org/10.1039/D0TA04941G">https://doi.org/10.1039/D0TA04941G</a>                   |
| 964. | PTQ10  | HO-IDIC-2F | 12.430 | 19.010 | 0.707 | 0.920 | <a href="https://doi.org/10.1039/D0TC01313G">https://doi.org/10.1039/D0TC01313G</a>                   |
| 965. | PTQ10  | HO-IDIC-2F | 12.320 | 19.280 | 0.718 | 0.890 | <a href="https://doi.org/10.1039/D0TC01313G">https://doi.org/10.1039/D0TC01313G</a>                   |
| 966. | PTQ10  | TPD8       | 10.400 | 18.200 | 0.630 | 0.910 | <a href="https://doi.org/10.1039/D0TC04601A">https://doi.org/10.1039/D0TC04601A</a>                   |
| 967. | PTQ10  | ZITI-C     | 13.130 | 20.110 | 0.689 | 0.930 | <a href="https://doi.org/10.1021/acs.jpcc.0c05654">https://doi.org/10.1021/acs.jpcc.0c05654</a>       |
| 968. | PTQ10  | ZITI-N     | 7.390  | 11.880 | 0.577 | 0.930 | <a href="https://doi.org/10.1021/acs.jpcc.0c05654">https://doi.org/10.1021/acs.jpcc.0c05654</a>       |
| 969. | PM6    | Y6         | 15.370 | 25.220 | 0.725 | 0.840 | <a href="https://doi.org/10.1016/j.joule.2019.12.004">https://doi.org/10.1016/j.joule.2019.12.004</a> |
| 970. | PM6    | Y6-2Cl     | 15.380 | 25.670 | 0.707 | 0.847 | <a href="https://doi.org/10.1016/j.joule.2019.12.004">https://doi.org/10.1016/j.joule.2019.12.004</a> |
| 971. | PTQ10  | Y6         | 13.620 | 22.620 | 0.703 | 0.855 | <a href="https://doi.org/10.1016/j.joule.2019.12.004">https://doi.org/10.1016/j.joule.2019.12.004</a> |
| 972. | PM6    | Y6-C2      | 15.590 | 25.760 | 0.717 | 0.844 | <a href="https://doi.org/10.1016/j.joule.2019.12.004">https://doi.org/10.1016/j.joule.2019.12.004</a> |



|      |          |       |        |        |       |       |                                                                                                             |
|------|----------|-------|--------|--------|-------|-------|-------------------------------------------------------------------------------------------------------------|
| 973. | PM6      | Y6    | 15.500 | 25.400 | 0.702 | 0.840 | <a href="https://doi.org/10.1021/a cs.nanolett.0 c05045">https://doi.org/10.1021/a cs.nanolett.0 c05045</a> |
| 974. | PTQ10    | Y6    | 15.000 | 24.900 | 0.693 | 0.860 | <a href="https://doi.org/10.1021/a cs.nanolett.0 c05045">https://doi.org/10.1021/a cs.nanolett.0 c05045</a> |
| 975. | PM7      | Y1-4F | 14.000 | 25.400 | 0.656 | 0.830 | <a href="https://doi.org/10.1021/a cs.nanolett.0 c05045">https://doi.org/10.1021/a cs.nanolett.0 c05045</a> |
| 976. | PTQ10    | Y1-4F | 6.900  | 15.300 | 0.528 | 0.850 | <a href="https://doi.org/10.1021/a cs.nanolett.0 c05045">https://doi.org/10.1021/a cs.nanolett.0 c05045</a> |
| 977. | PTQ10    | IDIC  | 10.410 | 15.700 | 0.649 | 0.995 | <a href="https://doi.org/10.1038/s 41467-018- 03207-x">https://doi.org/10.1038/s 41467-018- 03207-x</a>     |
| 978. | PTQ10    | IDIC  | 11.650 | 16.610 | 0.716 | 0.962 | <a href="https://doi.org/10.1038/s 41467-018- 03207-x">https://doi.org/10.1038/s 41467-018- 03207-x</a>     |
| 979. | PTQ10    | IDIC  | 12.700 | 17.440 | 0.733 | 0.962 | <a href="https://doi.org/10.1038/s 41467-018- 03207-x">https://doi.org/10.1038/s 41467-018- 03207-x</a>     |
| 980. | PTQ10    | IDIC  | 12.130 | 19.690 | 0.636 | 0.960 | <a href="https://doi.org/10.1038/s 41467-018- 03207-x">https://doi.org/10.1038/s 41467-018- 03207-x</a>     |
| 981. | PTQ10    | Y6    | 15.470 | 25.400 | 0.699 | 0.866 | <a href="https://doi.org/10.1007/s 11426-019- 9599-1">https://doi.org/10.1007/s 11426-019- 9599-1</a>       |
| 982. | PTQ10    | Y6    | 16.530 | 26.640 | 0.746 | 0.828 | <a href="https://doi.org/10.1007/s 11426-019- 9599-1">https://doi.org/10.1007/s 11426-019- 9599-1</a>       |
| 983. | PTQ10    | IDIC  | 13.190 | 18.620 | 0.738 | 0.960 | <a href="https://doi.org/10.1007/s 11426-019- 9599-1">https://doi.org/10.1007/s 11426-019- 9599-1</a>       |
| 984. | PBDTTzH  | IT-4F | 2.150  | 6.590  | 0.410 | 0.770 | <a href="https://doi.org/10.1002/a dfm.202011 168">https://doi.org/10.1002/a dfm.202011 168</a>             |
| 985. | PBDTTzEH | IT-4F | 10.100 | 16.260 | 0.650 | 0.930 | <a href="https://doi.org/10.1002/a dfm.202011 168">https://doi.org/10.1002/a dfm.202011 168</a>             |
| 986. | PBDTTzEH | IT-4F | 3.970  | 7.810  | 0.510 | 0.950 | <a href="https://doi.org/10.1002/a dfm.202011 168">https://doi.org/10.1002/a dfm.202011 168</a>             |
| 987. | PBDTTzHD | IT-4F | 2.340  | 5.800  | 0.380 | 0.970 | <a href="https://doi.org/10.1002/a dfm.202011 168">https://doi.org/10.1002/a dfm.202011 168</a>             |
| 988. | PM6      | Y6    | 17.720 | 26.810 | 0.767 | 0.862 | <a href="https://doi.org/10.1002/anie.202202177">https://doi.org/10.1002/anie.202202177</a>                 |

|      |         |            |        |        |       |       |                                                                                                               |
|------|---------|------------|--------|--------|-------|-------|---------------------------------------------------------------------------------------------------------------|
| 989. | PTB7-Th | ITIC       | 4.520  | 11.610 | 0.510 | 0.760 | <a href="https://doi.org/10.1016/j.orgel.2020.105893">https://doi.org/10.1016/j.orgel.2020.105893</a>         |
| 990. | PBDB-T  | Y6         | 9.550  | 24.330 | 0.577 | 0.680 | <a href="http://dx.doi.org/10.1016/j.nanoen.2021.105862">http://dx.doi.org/10.1016/j.nanoen.2021.105862</a>   |
| 991. | P1      | IT-4F      | 8.800  | 21.600 | 0.550 | 0.740 | <a href="https://doi.org/10.1016/j.synthmet.2020.116508">https://doi.org/10.1016/j.synthmet.2020.116508</a>   |
| 992. | PM6     | F-EH-2F    | 12.080 | 17.710 | 0.705 | 0.963 | <a href="http://dx.doi.org/10.1016/j.orgel.2022.106541">http://dx.doi.org/10.1016/j.orgel.2022.106541</a>     |
| 993. | PM6     | FOEH-2F    | 14.530 | 22.810 | 0.733 | 0.869 | <a href="http://dx.doi.org/10.1016/j.orgel.2022.106541">http://dx.doi.org/10.1016/j.orgel.2022.106541</a>     |
| 994. | D18     | FOEH-2F    | 15.510 | 23.750 | 0.738 | 0.880 | <a href="http://dx.doi.org/10.1016/j.orgel.2022.106541">http://dx.doi.org/10.1016/j.orgel.2022.106541</a>     |
| 995. | PBDB-T  | m-INPOIC   | 11.400 | 20.100 | 0.632 | 0.880 | <a href="http://dx.doi.org/10.1016/j.jechem.2020.05.054">http://dx.doi.org/10.1016/j.jecchem.2020.05.054</a>  |
| 996. | PT2     | IT-BnC6-4F | 13.360 | 20.700 | 0.728 | 0.860 | <a href="http://dx.doi.org/10.1016/j.dyepig.2021.109706">http://dx.doi.org/10.1016/j.dyepig.2021.109706</a>   |
| 997. | PT2     | IT-4F      | 12.850 | 19.400 | 0.764 | 0.830 | <a href="http://dx.doi.org/10.1016/j.dyepig.2021.109706">http://dx.doi.org/10.1016/j.dyepig.2021.109706</a>   |
| 998. | PM6     | Y6         | 15.380 | 24.870 | 0.724 | 0.855 | <a href="http://dx.doi.org/10.1002/sml.202107106">http://dx.doi.org/10.1002/sml.202107106</a>                 |
| 999. | PBDB-T  | ITIC       | 4.500  | 11.020 | 0.466 | 0.783 | <a href="http://dx.doi.org/10.1016/j.solener.2021.12.052">http://dx.doi.org/10.1016/j.solener.2021.12.052</a> |

|       |         |           |        |        |       |       |                                                                                                               |
|-------|---------|-----------|--------|--------|-------|-------|---------------------------------------------------------------------------------------------------------------|
| 1000. | PBT1-C  | TPT-IN    | 8.910  | 14.010 | 0.714 | 0.876 | <a href="http://dx.doi.org/10.1016/j.jec hem.2019.03.009">http://dx.doi.org/10.1016/j.jec hem.2019.03.009</a> |
| 1001. | PBT1-C  | SePT-IN   | 10.200 | 16.010 | 0.733 | 0.847 | <a href="http://dx.doi.org/10.1016/j.jec hem.2019.03.009">http://dx.doi.org/10.1016/j.jec hem.2019.03.009</a> |
| 1002. | P3HT    | O-IDTBR   | 3.300  | 7.600  | 0.610 | 0.700 | <a href="http://dx.doi.org/10.3389/fenr g.2021.741288">http://dx.doi.org/10.3389/fenr g.2021.741288</a>       |
| 1003. | PTB7-Th | DTC-T-F   | 8.800  | 17.460 | 0.646 | 0.780 | <a href="http://dx.doi.org/10.1016/j.org el.2020.106026">http://dx.doi.org/10.1016/j.org el.2020.106026</a>   |
| 1004. | PTB7-Th | DTC-F-F   | 7.530  | 16.010 | 0.560 | 0.840 | <a href="http://dx.doi.org/10.1016/j.org el.2020.106026">http://dx.doi.org/10.1016/j.org el.2020.106026</a>   |
| 1005. | PTB7-Th | DTC-F-C   | 2.700  | 8.940  | 0.408 | 0.740 | <a href="http://dx.doi.org/10.1016/j.org el.2020.106026">http://dx.doi.org/10.1016/j.org el.2020.106026</a>   |
| 1006. | PM6     | BDTN-BF   | 11.540 | 20.200 | 0.609 | 0.920 | <a href="http://dx.doi.org/10.1021/acsa mi.9b22093">http://dx.doi.org/10.1021/acsa mi.9b22093</a>             |
| 1007. | J52     | UF-Qx-2F  | 10.540 | 21.640 | 0.611 | 0.780 | <a href="http://dx.doi.org/10.1016/j.cej.2021.131473">http://dx.doi.org/10.1016/j.cej.2021.131473</a>         |
| 1008. | J52     | UF-Qx-2cl | 10.810 | 22.710 | 0.623 | 0.760 | <a href="http://dx.doi.org/10.1016/j.cej.2021.131473">http://dx.doi.org/10.1016/j.cej.2021.131473</a>         |
| 1009. | PBDB-T  | X94FIC    | 7.080  | 14.670 | 0.661 | 0.730 | <a href="http://dx.doi.org/10.1016/j.org el.2020.105662">http://dx.doi.org/10.1016/j.org el.2020.105662</a>   |
| 1010. | PBDB-T  | X9IC      | 6.290  | 11.460 | 0.639 | 0.860 | <a href="http://dx.doi.org/10.1016/j.org el.2020.105662">http://dx.doi.org/10.1016/j.org el.2020.105662</a>   |

|       |            |          |        |        |       |       |                                                                                                           |
|-------|------------|----------|--------|--------|-------|-------|-----------------------------------------------------------------------------------------------------------|
| 1011. | PBDB-T     | X9Rd     | 2.480  | 6.700  | 0.341 | 1.080 | <a href="http://dx.doi.org/10.1016/j.orgel.2020.105662">http://dx.doi.org/10.1016/j.orgel.2020.105662</a> |
| 1012. | PBDB-T     | X9T4FIC  | 3.220  | 7.010  | 0.541 | 0.850 | <a href="http://dx.doi.org/10.1016/j.orgel.2020.105662">http://dx.doi.org/10.1016/j.orgel.2020.105662</a> |
| 1013. | PE71       | Y6       | 12.030 | 21.780 | 0.650 | 0.820 | <a href="http://dx.doi.org/10.1007/s11426-020-9777-1">http://dx.doi.org/10.1007/s11426-020-9777-1</a>     |
| 1014. | PE72       | Y6       | 9.740  | 18.510 | 0.610 | 0.850 | <a href="http://dx.doi.org/10.1007/s11426-020-9777-1">http://dx.doi.org/10.1007/s11426-020-9777-1</a>     |
| 1015. | PBDB-T-SF  | IT-4F    | 9.530  | 22.390 | 0.541 | 0.786 | <a href="http://dx.doi.org/10.1021/acscami.9b20857">http://dx.doi.org/10.1021/acscami.9b20857</a>         |
| 1016. | D18        | BTP-eC11 | 16.600 | 25.800 | 0.722 | 0.860 | <a href="http://dx.doi.org/10.1007/s11426-021-1128-1">http://dx.doi.org/10.1007/s11426-021-1128-1</a>     |
| 1017. | D18        | N3       | 17.000 | 26.400 | 0.718 | 0.840 | <a href="http://dx.doi.org/10.1007/s11426-021-1128-1">http://dx.doi.org/10.1007/s11426-021-1128-1</a>     |
| 1018. | PBDB-T-H   | Y6       | 9.940  | 20.650 | 0.600 | 0.790 | <a href="http://dx.doi.org/10.1021/acscami.9b22275">http://dx.doi.org/10.1021/acscami.9b22275</a>         |
| 1019. | PBDB-T-Br  | Y6       | 13.200 | 25.260 | 0.650 | 0.790 | <a href="http://dx.doi.org/10.1021/acscami.9b22275">http://dx.doi.org/10.1021/acscami.9b22275</a>         |
| 1020. | PBDB-T-OMe | Y6       | 12.750 | 24.200 | 0.700 | 0.760 | <a href="http://dx.doi.org/10.1021/acscami.9b22275">http://dx.doi.org/10.1021/acscami.9b22275</a>         |
| 1021. | PBDB-T-T   | Y6       | 12.460 | 24.420 | 0.640 | 0.780 | <a href="http://dx.doi.org/10.1021/acscami.9b22275">http://dx.doi.org/10.1021/acscami.9b22275</a>         |

|       |            |           |        |        |       |       |                                                                                                           |
|-------|------------|-----------|--------|--------|-------|-------|-----------------------------------------------------------------------------------------------------------|
| 1022. | PBDB-T     | i-cc23    | 7.340  | 11.100 | 0.595 | 1.090 | <a href="http://dx.doi.org/10.1021/acscami.0c03842">http://dx.doi.org/10.1021/acscami.0c03842</a>         |
| 1023. | PBDB-T     | i-cc34    | 9.510  | 15.460 | 0.630 | 0.960 | <a href="http://dx.doi.org/10.1021/acscami.0c03842">http://dx.doi.org/10.1021/acscami.0c03842</a>         |
| 1024. | PBDB-T     | i-IEICO   | 8.790  | 14.670 | 0.596 | 1.010 | <a href="http://dx.doi.org/10.1021/acscami.0c03842">http://dx.doi.org/10.1021/acscami.0c03842</a>         |
| 1025. | PM6        | DTBCIC-F  | 11.660 | 19.150 | 0.679 | 0.910 | <a href="http://dx.doi.org/10.1021/acscampm.1c01406">http://dx.doi.org/10.1021/acscampm.1c01406</a>       |
| 1026. | PM6        | DTBCIC-Cl | 12.710 | 20.400 | 0.694 | 0.890 | <a href="http://dx.doi.org/10.1021/acscampm.1c01406">http://dx.doi.org/10.1021/acscampm.1c01406</a>       |
| 1027. | PBDB-TF    | IT-4F     | 10.180 | 17.900 | 0.628 | 0.910 | <a href="http://dx.doi.org/10.1016/j.apusc.2021.151120">http://dx.doi.org/10.1016/j.apusc.2021.151120</a> |
| 1028. | PBDB-T-2Cl | IT-4F     | 10.040 | 19.480 | 0.647 | 0.800 | <a href="http://dx.doi.org/10.1016/j.orgel.2021.106139">http://dx.doi.org/10.1016/j.orgel.2021.106139</a> |
| 1029. | PTB7-Th    | IEICO-4F  | 10.900 | 24.400 | 0.640 | 0.700 | <a href="https://sci-hub.st/10.1002/solr.202100592">https://sci-hub.st/10.1002/solr.202100592</a>         |
| 1030. | PBDB-T-H   | Y6        | 9.050  | 20.710 | 0.530 | 0.800 | <a href="http://dx.doi.org/10.1007/s10118-020-2490-y">http://dx.doi.org/10.1007/s10118-020-2490-y</a>     |
| 1031. | PBDB-T-I   | Y6        | 12.630 | 24.420 | 0.660 | 0.760 | <a href="http://dx.doi.org/10.1007/s10118-020-2490-y">http://dx.doi.org/10.1007/s10118-020-2490-y</a>     |
| 1032. | PBDB-T-OAc | Y6        | 12.590 | 25.570 | 0.610 | 0.790 | <a href="http://dx.doi.org/10.1007/s10118-020-2490-y">http://dx.doi.org/10.1007/s10118-020-2490-y</a>     |

|       |         |           |        |        |       |       |                                                                                                                 |
|-------|---------|-----------|--------|--------|-------|-------|-----------------------------------------------------------------------------------------------------------------|
| 1033. | PBDB-T  | IT-SM     | 7.930  | 15.150 | 0.590 | 0.840 | <a href="http://dx.doi.org/10.1016/j.dyepig.2021.109987">http://dx.doi.org/10.1016/j.dyepig.2021.109987</a>     |
| 1034. | PBDB-T  | IT-DSM    | 5.650  | 12.540 | 0.490 | 0.880 | <a href="http://dx.doi.org/10.1016/j.dyepig.2021.109987">http://dx.doi.org/10.1016/j.dyepig.2021.109987</a>     |
| 1035. | PBDS-T  | BTP-eC9   | 14.600 | 23.800 | 0.690 | 0.860 | <a href="http://dx.doi.org/10.1016/j.cej.2022.134878">http://dx.doi.org/10.1016/j.cej.2022.134878</a>           |
| 1036. | PM6     | Y6-eC6-HD | 13.740 | 21.120 | 0.732 | 0.870 | <a href="http://dx.doi.org/10.1016/j.chemphys.2021.111172">http://dx.doi.org/10.1016/j.chemphys.2021.111172</a> |
| 1037. | PTB7-Th | 6-IFIC    | 9.740  | 22.350 | 0.614 | 0.690 | <a href="http://dx.doi.org/10.1021/acsaami.1c13404">http://dx.doi.org/10.1021/acsaami.1c13404</a>               |
| 1038. | PTB7-Th | 6-IF2F    | 11.200 | 24.690 | 0.678 | 0.650 | <a href="http://dx.doi.org/10.1021/acsaami.1c13404">http://dx.doi.org/10.1021/acsaami.1c13404</a>               |
| 1039. | PTB7-Th | 6-IF4F    | 10.460 | 25.210 | 0.679 | 0.590 | <a href="http://dx.doi.org/10.1021/acsaami.1c13404">http://dx.doi.org/10.1021/acsaami.1c13404</a>               |
| 1040. | PTB7-Th | IEICO-4F  | 10.750 | 22.150 | 0.620 | 0.710 | <a href="http://dx.doi.org/10.1021/acsaami.2c03340">http://dx.doi.org/10.1021/acsaami.2c03340</a>               |
| 1041. | PM6     | NCIC      | 10.320 | 17.530 | 0.667 | 0.879 | <a href="http://dx.doi.org/10.1016/j.solmat.2021.111046">http://dx.doi.org/10.1016/j.solmat.2021.111046</a>     |
| 1042. | PM6     | NOCIC     | 9.890  | 16.220 | 0.670 | 0.907 | <a href="http://dx.doi.org/10.1016/j.solmat.2021.111046">http://dx.doi.org/10.1016/j.solmat.2021.111046</a>     |
| 1043. | PBDB-T  | IT-4F     | 11.260 | 19.790 | 0.677 | 0.840 | <a href="http://dx.doi.org/10.1016/j.org">http://dx.doi.org/10.1016/j.org</a>                                   |

|       |           |          |        |        |       |       |                                                                                                               |
|-------|-----------|----------|--------|--------|-------|-------|---------------------------------------------------------------------------------------------------------------|
|       |           |          |        |        |       |       | <a href="https://doi.org/10.1007/s11426-020-9747-9">e1.2022.106495</a>                                        |
| 1044. | PM6       | Y3       | 13.760 | 24.100 | 0.664 | 0.810 | <a href="https://doi.org/10.1007/s11426-020-9747-9">http://dx.doi.org/10.1007/s11426-020-9747-9</a>           |
| 1045. | PM6       | Y11      | 15.650 | 24.620 | 0.733 | 0.840 | <a href="https://doi.org/10.1007/s11426-020-9747-9">http://dx.doi.org/10.1007/s11426-020-9747-9</a>           |
| 1046. | PM6       | Y18      | 16.370 | 24.910 | 0.764 | 0.840 | <a href="https://doi.org/10.1007/s11426-020-9747-9">http://dx.doi.org/10.1007/s11426-020-9747-9</a>           |
| 1047. | PBDT-AFBT | IDTCN-O  | 12.330 | 21.480 | 0.657 | 0.860 | <a href="https://doi.org/10.1021/acscami.0c17571">http://dx.doi.org/10.1021/acscami.0c17571</a>               |
| 1048. | PBDT-AFBT | ITOIC-2F | 11.500 | 20.720 | 0.629 | 0.869 | <a href="https://doi.org/10.1021/acscami.0c17571">http://dx.doi.org/10.1021/acscami.0c17571</a>               |
| 1049. | PBDT-AFBT | IEICO-4F | 9.400  | 22.920 | 0.545 | 0.744 | <a href="https://doi.org/10.1021/acscami.0c17571">http://dx.doi.org/10.1021/acscami.0c17571</a>               |
| 1050. | PTQ10     | BTP-Fu   | 4.800  | 14.500 | 0.401 | 0.802 | <a href="https://doi.org/10.1016/j.cej.2022.135998">http://dx.doi.org/10.1016/j.cej.2022.135998</a>           |
| 1051. | PTQ10     | BTP-Th   | 16.800 | 25.000 | 0.764 | 0.874 | <a href="https://doi.org/10.1016/j.cej.2022.135998">http://dx.doi.org/10.1016/j.cej.2022.135998</a>           |
| 1052. | PTQ10     | BTP-Se   | 15.300 | 22.700 | 0.746 | 0.871 | <a href="https://doi.org/10.1016/j.cej.2022.135998">http://dx.doi.org/10.1016/j.cej.2022.135998</a>           |
| 1053. | PBDB-T    | IDTT2OT  | 6.460  | 12.080 | 0.556 | 0.920 | <a href="https://doi.org/10.1016/j.synthmet.2021.116880">http://dx.doi.org/10.1016/j.synthmet.2021.116880</a> |

|       |            |            |        |        |       |       |                                                                                                                 |
|-------|------------|------------|--------|--------|-------|-------|-----------------------------------------------------------------------------------------------------------------|
| 1054. | PBDB-T     | IDTT2OT-2F | 10.040 | 17.430 | 0.644 | 0.870 | <a href="http://dx.doi.org/10.1016/j.synthmet.2021.116880">http://dx.doi.org/10.1016/j.synthmet.2021.116880</a> |
| 1055. | PBDB-T     | IDTT2OT-4F | 10.400 | 19.120 | 0.624 | 0.850 | <a href="http://dx.doi.org/10.1016/j.synthmet.2021.116880">http://dx.doi.org/10.1016/j.synthmet.2021.116880</a> |
| 1056. | PBDB-T     | BCPDT-1    | 7.540  | 16.030 | 0.578 | 0.750 | <a href="http://dx.doi.org/10.1016/j.orgel.2021.106131">http://dx.doi.org/10.1016/j.orgel.2021.106131</a>       |
| 1057. | PBDB-T     | BCPDT-2    | 10.650 | 19.010 | 0.670 | 0.810 | <a href="http://dx.doi.org/10.1016/j.orgel.2021.106131">http://dx.doi.org/10.1016/j.orgel.2021.106131</a>       |
| 1058. | PBDTTzBO   | IT-4F      | 5.230  | 12.960 | 0.477 | 0.847 | <a href="http://dx.doi.org/10.1021/acsaami.2c06077">http://dx.doi.org/10.1021/acsaami.2c06077</a>               |
| 1059. | PFBDTTzBO  | IT-4F      | 10.300 | 17.220 | 0.639 | 0.935 | <a href="http://dx.doi.org/10.1021/acsaami.2c06077">http://dx.doi.org/10.1021/acsaami.2c06077</a>               |
| 1060. | PFSBDTTzBO | IT-4F      | 7.350  | 14.610 | 0.520 | 0.965 | <a href="http://dx.doi.org/10.1021/acsaami.2c06077">http://dx.doi.org/10.1021/acsaami.2c06077</a>               |
| 1061. | PBDB-T     | IFL-ED-4F  | 7.500  | 13.640 | 0.582 | 0.940 | <a href="http://dx.doi.org/10.1016/j.jechem.2021.05.032">http://dx.doi.org/10.1016/j.jechem.2021.05.032</a>     |
| 1062. | PBDB-T     | IDT-ED-4F  | 10.400 | 22.140 | 0.530 | 0.880 | <a href="http://dx.doi.org/10.1016/j.jechem.2021.05.032">http://dx.doi.org/10.1016/j.jechem.2021.05.032</a>     |
| 1063. | PBDB-T     | IDTT-ED-2F | 1.500  | 5.100  | 0.318 | 0.910 | <a href="http://dx.doi.org/10.1016/j.jechem.2021.05.032">http://dx.doi.org/10.1016/j.jechem.2021.05.032</a>     |
| 1064. | PM6        | BTP-BO-4Cl | 14.400 | 24.060 | 0.715 | 0.840 | <a href="http://dx.doi.org/10.1016/j.jechem.2021.05.032">http://dx.doi.org/10.1016/j.jechem.2021.05.032</a>     |



|       |           |            |        |        |       |       |                                                                                                             |
|-------|-----------|------------|--------|--------|-------|-------|-------------------------------------------------------------------------------------------------------------|
| 1065. | PBDB-T-SF | IT-4F      | 11.500 | 18.710 | 0.690 | 0.830 | <a href="http://dx.doi.org/10.1039/d1ta01609a">http://dx.doi.org/10.1039/d1ta01609a</a>                     |
| 1066. | PCDTBT    | MPU2       | 8.040  | 14.730 | 0.642 | 0.850 | <a href="https://doi.org/10.1016/j.solenar.2021.04.049">https://doi.org/10.1016/j.solenar.2021.04.049</a>   |
| 1067. | PCDTBT    | MPU5       | 10.120 | 16.320 | 0.660 | 0.950 | <a href="https://doi.org/10.1016/j.solenar.2021.04.049">https://doi.org/10.1016/j.solenar.2021.04.049</a>   |
| 1068. | PM6       | Y6         | 15.890 | 25.690 | 0.719 | 0.860 | <a href="http://dx.doi.org/10.1021/acscami.1c11139">http://dx.doi.org/10.1021/acscami.1c11139</a>           |
| 1069. | PBDB-T    | TTC8-O1-4F | 10.750 | 21.550 | 0.582 | 0.842 | <a href="http://dx.doi.org/10.1021/acscami.0c05331">http://dx.doi.org/10.1021/acscami.0c05331</a>           |
| 1070. | 7T-CNA    | Y6         | 7.200  | 15.400 | 0.667 | 0.700 | <a href="http://dx.doi.org/10.1016/j.dyepig.2021.109592">http://dx.doi.org/10.1016/j.dyepig.2021.109592</a> |
| 1071. | PTQ-10    | BT-F       | 8.260  | 16.990 | 0.593 | 0.820 | <a href="http://dx.doi.org/10.1016/j.orgel.2021.106132">http://dx.doi.org/10.1016/j.orgel.2021.106132</a>   |
| 1072. | PTQ-10    | BT-CI      | 8.650  | 17.850 | 0.611 | 0.790 | <a href="http://dx.doi.org/10.1016/j.orgel.2021.106132">http://dx.doi.org/10.1016/j.orgel.2021.106132</a>   |
| 1073. | PBDB-T    | BTCIC      | 9.300  | 18.200 | 0.610 | 0.790 | <a href="http://dx.doi.org/10.1021/acscami.0c01850">http://dx.doi.org/10.1021/acscami.0c01850</a>           |
| 1074. | PBDB-T    | BTCIC-4CI  | 10.200 | 22.600 | 0.670 | 0.630 | <a href="http://dx.doi.org/10.1021/acscami.0c01850">http://dx.doi.org/10.1021/acscami.0c01850</a>           |
| 1075. | PBDBT-2CI | BTCIC-4CI  | 10.500 | 20.800 | 0.630 | 0.750 | <a href="http://dx.doi.org/10.1021/acscami.0c01850">http://dx.doi.org/10.1021/acscami.0c01850</a>           |

|       |        |           |        |        |       |       |                                                                                                         |
|-------|--------|-----------|--------|--------|-------|-------|---------------------------------------------------------------------------------------------------------|
| 1076. | PM6    | BTP-eC9   | 17.460 | 26.370 | 0.777 | 0.838 | <a href="http://dx.doi.org/10.1002/adma.202101733">http://dx.doi.org/10.1002/adma.202101733</a>         |
| 1077. | PM6    | L8-BO-F   | 16.820 | 23.070 | 0.763 | 0.932 | <a href="http://dx.doi.org/10.1002/adma.202101733">http://dx.doi.org/10.1002/adma.202101733</a>         |
| 1078. | PBDB-T | ITIC-4F   | 5.020  | 14.820 | 0.550 | 0.610 | <a href="http://dx.doi.org/10.1016/j.jmst.2020.02.054">http://dx.doi.org/10.1016/j.jmst.2020.02.054</a> |
| 1079. | PM6    | BT-BO-LIC | 9.600  | 18.410 | 0.560 | 0.900 | <a href="http://dx.doi.org/10.1002/aenm.202102172">http://dx.doi.org/10.1002/aenm.202102172</a>         |
| 1080. | PM6    | BT-BO-L2F | 14.130 | 23.140 | 0.681 | 0.870 | <a href="http://dx.doi.org/10.1002/aenm.202102172">http://dx.doi.org/10.1002/aenm.202102172</a>         |
| 1081. | PM6    | BT-BO-L4F | 16.810 | 27.620 | 0.705 | 0.830 | <a href="http://dx.doi.org/10.1002/aenm.202102172">http://dx.doi.org/10.1002/aenm.202102172</a>         |
| 1082. | P-FT   | m-ITIC    | 11.100 | 17.440 | 0.685 | 0.910 | <a href="http://dx.doi.org/10.1021/acscami.1c00327">http://dx.doi.org/10.1021/acscami.1c00327</a>       |
| 1083. | P-FT   | Y6        | 10.520 | 19.250 | 0.704 | 0.740 | <a href="http://dx.doi.org/10.1021/acscami.1c00327">http://dx.doi.org/10.1021/acscami.1c00327</a>       |
| 1084. | P-CIT  | m-ITIC    | 11.590 | 16.700 | 0.716 | 0.920 | <a href="http://dx.doi.org/10.1021/acscami.1c00327">http://dx.doi.org/10.1021/acscami.1c00327</a>       |
| 1085. | P-CIT  | Y6        | 10.790 | 19.710 | 0.701 | 0.770 | <a href="http://dx.doi.org/10.1021/acscami.1c00327">http://dx.doi.org/10.1021/acscami.1c00327</a>       |
| 1086. | P-P    | m-ITIC    | 7.910  | 16.250 | 0.563 | 0.800 | <a href="http://dx.doi.org/10.1021/acscami.1c00327">http://dx.doi.org/10.1021/acscami.1c00327</a>       |

|       |           |         |        |        |       |       |                                                                                                             |
|-------|-----------|---------|--------|--------|-------|-------|-------------------------------------------------------------------------------------------------------------|
| 1087. | P-P       | Y6      | 8.220  | 24.200 | 0.543 | 0.616 | <a href="http://dx.doi.org/10.1021/acscami.1c00327">http://dx.doi.org/10.1021/acscami.1c00327</a>           |
| 1088. | P-4FP     | m-ITIC  | 8.960  | 15.720 | 0.577 | 0.960 | <a href="http://dx.doi.org/10.1021/acscami.1c00327">http://dx.doi.org/10.1021/acscami.1c00327</a>           |
| 1089. | P-4FP     | Y6      | 13.220 | 22.610 | 0.703 | 0.800 | <a href="http://dx.doi.org/10.1021/acscami.1c00327">http://dx.doi.org/10.1021/acscami.1c00327</a>           |
| 1090. | P3HT      | BTA43   | 6.560  | 10.840 | 0.680 | 0.890 | <a href="http://dx.doi.org/10.1021/acscami.9b16662">http://dx.doi.org/10.1021/acscami.9b16662</a>           |
| 1091. | P3HT      | BTA53   | 6.310  | 11.570 | 0.620 | 0.880 | <a href="http://dx.doi.org/10.1021/acscami.9b16662">http://dx.doi.org/10.1021/acscami.9b16662</a>           |
| 1092. | PM6       | PCPD-F  | 9.030  | 13.600 | 0.722 | 0.920 | <a href="http://dx.doi.org/10.1016/j.dyepig.2022.110232">http://dx.doi.org/10.1016/j.dyepig.2022.110232</a> |
| 1093. | PM7       | PCPD-F  | 8.260  | 12.410 | 0.708 | 0.950 | <a href="http://dx.doi.org/10.1016/j.dyepig.2022.110232">http://dx.doi.org/10.1016/j.dyepig.2022.110232</a> |
| 1094. | PM7       | PCPD-Cl | 6.770  | 13.820 | 0.570 | 0.860 | <a href="http://dx.doi.org/10.1016/j.dyepig.2022.110232">http://dx.doi.org/10.1016/j.dyepig.2022.110232</a> |
| 1095. | PBDBT-2F  | IT-4F   | 13.720 | 20.540 | 0.777 | 0.860 | <a href="http://dx.doi.org/10.1021/acscami.0c09123">http://dx.doi.org/10.1021/acscami.0c09123</a>           |
| 1096. | PBDBT-2Cl | IT-4F   | 14.050 | 21.520 | 0.759 | 0.860 | <a href="http://dx.doi.org/10.1021/acscami.0c09123">http://dx.doi.org/10.1021/acscami.0c09123</a>           |
| 1097. | PBDBT-2F  | Y6      | 16.090 | 26.220 | 0.749 | 0.820 | <a href="http://dx.doi.org/10.1021/acscami.0c09123">http://dx.doi.org/10.1021/acscami.0c09123</a>           |

|       |          |          |        |        |       |       |                                                                                                             |
|-------|----------|----------|--------|--------|-------|-------|-------------------------------------------------------------------------------------------------------------|
| 1098. | PBDBT-SF | IT-4F    | 12.940 | 20.320 | 0.723 | 0.880 | <a href="http://dx.doi.org/10.1021/acscami.0c09123">http://dx.doi.org/10.1021/acscami.0c09123</a>           |
| 1099. | PBDBT    | ITIC     | 10.270 | 16.390 | 0.704 | 0.890 | <a href="http://dx.doi.org/10.1021/acscami.0c09123">http://dx.doi.org/10.1021/acscami.0c09123</a>           |
| 1100. | P3HT     | IDT-2    | 1.740  | 3.910  | 0.456 | 0.950 | <a href="http://dx.doi.org/10.3390/molecules27041229">http://dx.doi.org/10.3390/molecules27041229</a>       |
| 1101. | 2TRA     | O-IDTBR  | 10.080 | 14.590 | 0.654 | 1.060 | <a href="http://dx.doi.org/10.1016/j.orgel.2020.105874">http://dx.doi.org/10.1016/j.orgel.2020.105874</a>   |
| 1102. | 2TRA     | IEICO-4F | 12.100 | 23.740 | 0.700 | 0.730 | <a href="http://dx.doi.org/10.1016/j.orgel.2020.105874">http://dx.doi.org/10.1016/j.orgel.2020.105874</a>   |
| 1103. | 2TRR     | IEICO-4F | 2.850  | 7.530  | 0.500 | 0.760 | <a href="http://dx.doi.org/10.1016/j.orgel.2020.105874">http://dx.doi.org/10.1016/j.orgel.2020.105874</a>   |
| 1104. | PM6      | ITIC     | 8.400  | 15.300 | 0.556 | 0.950 | <a href="http://dx.doi.org/10.1021/acscami.9b20544">http://dx.doi.org/10.1021/acscami.9b20544</a>           |
| 1105. | PM6      | ITCF3    | 13.300 | 20.700 | 0.754 | 0.840 | <a href="http://dx.doi.org/10.1021/acscami.9b20544">http://dx.doi.org/10.1021/acscami.9b20544</a>           |
| 1106. | PBDB-T   | SNC2C4-F | 4.250  | 10.990 | 0.442 | 0.850 | <a href="http://dx.doi.org/10.1016/j.dyepig.2021.109661">http://dx.doi.org/10.1016/j.dyepig.2021.109661</a> |
| 1107. | PBDB-T   | SNC4C6-F | 10.710 | 18.370 | 0.658 | 0.870 | <a href="http://dx.doi.org/10.1016/j.dyepig.2021.109661">http://dx.doi.org/10.1016/j.dyepig.2021.109661</a> |
| 1108. | PBDB-T   | SNC6C8-F | 9.250  | 16.490 | 0.615 | 0.890 | <a href="http://dx.doi.org/10.1016/j.dyepig.2021.109661">http://dx.doi.org/10.1016/j.dyepig.2021.109661</a> |

|       |            |         |        |        |       |       |                                                                                                                     |
|-------|------------|---------|--------|--------|-------|-------|---------------------------------------------------------------------------------------------------------------------|
| 1109. | PTB7-Th    | BDTI    | 8.540  | 19.090 | 0.621 | 0.720 | <a href="http://dx.doi.org/10.1016/j.jec hem.2020.03.058">http://dx.doi.org/10.1016/j.jec hem.2020.03.058</a>       |
| 1110. | PTB7-Th    | BDTI-2F | 9.110  | 21.700 | 0.656 | 0.640 | <a href="http://dx.doi.org/10.1016/j.jec hem.2020.03.058">http://dx.doi.org/10.1016/j.jec hem.2020.03.058</a>       |
| 1111. | PTB7-Th    | BDTI-4F | 7.960  | 20.120 | 0.649 | 0.610 | <a href="http://dx.doi.org/10.1016/j.jec hem.2020.03.058">http://dx.doi.org/10.1016/j.jec hem.2020.03.058</a>       |
| 1112. | PBDB-T     | Py-2H   | 5.130  | 10.640 | 0.478 | 1.010 | <a href="http://dx.doi.org/10.1016/j.syn thmet.202 1.116904">http://dx.doi.org/10.1016/j.syn thmet.202 1.116904</a> |
| 1113. | PBDB-T     | Py-2F   | 9.730  | 15.440 | 0.682 | 0.920 | <a href="http://dx.doi.org/10.1016/j.syn thmet.202 1.116904">http://dx.doi.org/10.1016/j.syn thmet.202 1.116904</a> |
| 1114. | PBDB-T-SF  | IT-4F   | 13.100 | 20.880 | 0.713 | 0.880 | <a href="http://dx.doi.org/10.1016/j.syn thmet.202 1.116736">http://dx.doi.org/10.1016/j.syn thmet.202 1.116736</a> |
| 1115. | PBDB-TF    | IT-4F   | 13.200 | 20.810 | 0.760 | 0.840 | <a href="http://dx.doi.org/10.1016/j.syn thmet.202 1.116736">http://dx.doi.org/10.1016/j.syn thmet.202 1.116736</a> |
| 1116. | PBDB-T-2Cl | IT-4F   | 14.400 | 21.800 | 0.760 | 0.860 | <a href="http://dx.doi.org/10.1016/j.syn thmet.202 1.116736">http://dx.doi.org/10.1016/j.syn thmet.202 1.116736</a> |
| 1117. | PBDB-TF    | IDTN    | 12.200 | 16.580 | 0.780 | 0.940 | <a href="http://dx.doi.org/10.1016/j.syn thmet.202 1.116736">http://dx.doi.org/10.1016/j.syn thmet.202 1.116736</a> |
| 1118. | PBDB-T     | ITIC    | 11.220 | 16.800 | 0.740 | 0.900 | <a href="http://dx.doi.org/10.1016/j.syn thmet.202 1.116736">http://dx.doi.org/10.1016/j.syn thmet.202 1.116736</a> |
| 1119. | PBDB-T     | ITCT    | 11.270 | 17.880 | 0.723 | 0.850 | <a href="http://dx.doi.org/10.1016/j.syn thmet.202 1.116736">http://dx.doi.org/10.1016/j.syn thmet.202 1.116736</a> |

|       |            |            |        |        |       |       |                                                                                                                 |
|-------|------------|------------|--------|--------|-------|-------|-----------------------------------------------------------------------------------------------------------------|
| 1120. | PBDB-T     | ITCC       | 11.400 | 15.900 | 0.710 | 1.010 | <a href="http://dx.doi.org/10.1016/j.synthmet.2021.116736">http://dx.doi.org/10.1016/j.synthmet.2021.116736</a> |
| 1121. | PBDB-T     | IT-M       | 11.480 | 20.510 | 0.700 | 0.800 | <a href="http://dx.doi.org/10.1016/j.synthmet.2021.116736">http://dx.doi.org/10.1016/j.synthmet.2021.116736</a> |
| 1122. | PBDB-T     | IT-DM      | 11.290 | 16.480 | 0.706 | 0.970 | <a href="http://dx.doi.org/10.1016/j.synthmet.2021.116736">http://dx.doi.org/10.1016/j.synthmet.2021.116736</a> |
| 1123. | PBDB-T     | IT-M       | 12.100 | 17.340 | 0.732 | 0.950 | <a href="http://dx.doi.org/10.1016/j.synthmet.2021.116736">http://dx.doi.org/10.1016/j.synthmet.2021.116736</a> |
| 1124. | PM7        | IT-4F      | 10.930 | 18.560 | 0.634 | 0.902 | <a href="http://dx.doi.org/10.1016/j.orgel.2020.105871">http://dx.doi.org/10.1016/j.orgel.2020.105871</a>       |
| 1125. | PM7        | IT-4CL     | 10.770 | 19.600 | 0.609 | 0.871 | <a href="http://dx.doi.org/10.1016/j.orgel.2020.105871">http://dx.doi.org/10.1016/j.orgel.2020.105871</a>       |
| 1126. | PBDB-T-2F  | ITCC-Br    | 10.700 | 16.200 | 0.649 | 0.990 | <a href="http://dx.doi.org/10.1016/j.orgel.2021.106357">http://dx.doi.org/10.1016/j.orgel.2021.106357</a>       |
| 1127. | PBDB-T-2F  | IDTT-2F-Br | 12.100 | 18.400 | 0.687 | 0.940 | <a href="http://dx.doi.org/10.1016/j.orgel.2021.106357">http://dx.doi.org/10.1016/j.orgel.2021.106357</a>       |
| 1128. | PBDB-T-2Cl | ITCC-Br    | 10.500 | 15.900 | 0.638 | 1.040 | <a href="http://dx.doi.org/10.1016/j.orgel.2021.106357">http://dx.doi.org/10.1016/j.orgel.2021.106357</a>       |
| 1129. | PBDB-T-2Cl | IDTT-2F-Br | 11.400 | 17.400 | 0.661 | 0.970 | <a href="http://dx.doi.org/10.1016/j.orgel.2021.106357">http://dx.doi.org/10.1016/j.orgel.2021.106357</a>       |
| 1130. | PTC8       | ITIC       | 4.040  | 11.570 | 0.387 | 0.900 | <a href="http://dx.doi.org/10.1016/j.dyepig.2020.108987">http://dx.doi.org/10.1016/j.dyepig.2020.108987</a>     |

|       |       |           |        |        |       |       |                                                                                                             |
|-------|-------|-----------|--------|--------|-------|-------|-------------------------------------------------------------------------------------------------------------|
| 1131. | PTCO8 | ITIC      | 5.910  | 14.330 | 0.415 | 0.990 | <a href="http://dx.doi.org/10.1016/j.dyepig.2020.108987">http://dx.doi.org/10.1016/j.dyepig.2020.108987</a> |
| 1132. | PTC01 | ITIC      | 9.330  | 16.910 | 0.579 | 0.950 | <a href="http://dx.doi.org/10.1016/j.dyepig.2020.108987">http://dx.doi.org/10.1016/j.dyepig.2020.108987</a> |
| 1133. | PM6   | TB-4Cl    | 14.450 | 23.200 | 0.746 | 0.835 | <a href="http://dx.doi.org/10.1021/acscami.1c02652">http://dx.doi.org/10.1021/acscami.1c02652</a>           |
| 1134. | PM6   | PTIC-4Cl  | 14.810 | 23.300 | 0.739 | 0.860 | <a href="http://dx.doi.org/10.1021/acscami.1c02652">http://dx.doi.org/10.1021/acscami.1c02652</a>           |
| 1135. | PM6   | PT2IC-4Cl | 12.510 | 20.700 | 0.724 | 0.834 | <a href="http://dx.doi.org/10.1021/acscami.1c02652">http://dx.doi.org/10.1021/acscami.1c02652</a>           |
| 1136. | PM6   | NITT-BF   | 12.300 | 18.080 | 0.724 | 0.940 | <a href="http://dx.doi.org/10.1016/j.cej.2021.130618">http://dx.doi.org/10.1016/j.cej.2021.130618</a>       |
| 1137. | PM6   | NITT-ThCl | 9.580  | 16.300 | 0.606 | 0.970 | <a href="http://dx.doi.org/10.1016/j.cej.2021.130618">http://dx.doi.org/10.1016/j.cej.2021.130618</a>       |
| 1138. | PM6   | IT-BT-CN  | 9.950  | 16.380 | 0.632 | 1.000 | <a href="http://dx.doi.org/10.1021/acscem.1c01872">http://dx.doi.org/10.1021/acscem.1c01872</a>             |
| 1139. | PM6   | IT-BT-ICN | 10.980 | 17.540 | 0.699 | 0.870 | <a href="http://dx.doi.org/10.1021/acscem.1c01872">http://dx.doi.org/10.1021/acscem.1c01872</a>             |
| 1140. | J101  | MeIC      | 11.830 | 17.800 | 0.707 | 0.940 | <a href="http://dx.doi.org/10.1016/j.orgel.2020.105880">http://dx.doi.org/10.1016/j.orgel.2020.105880</a>   |
| 1141. | J101  | F-IXIC    | 9.440  | 22.090 | 0.562 | 0.760 | <a href="http://dx.doi.org/10.1016/j.orgel.2020.105880">http://dx.doi.org/10.1016/j.orgel.2020.105880</a>   |

|       |        |         |        |        |       |       |                                                                                                           |
|-------|--------|---------|--------|--------|-------|-------|-----------------------------------------------------------------------------------------------------------|
| 1142. | J101   | CI-IXIC | 9.450  | 23.120 | 0.531 | 0.770 | <a href="http://dx.doi.org/10.1016/j.orgel.2020.105880">http://dx.doi.org/10.1016/j.orgel.2020.105880</a> |
| 1143. | PE25   | BTA3    | 9.080  | 11.430 | 0.645 | 1.000 | <a href="http://dx.doi.org/10.1021/acsaami.1c14317">http://dx.doi.org/10.1021/acsaami.1c14317</a>         |
| 1144. | PE25   | F-BTA3  | 10.480 | 12.750 | 0.723 | 1.120 | <a href="http://dx.doi.org/10.1021/acsaami.1c14317">http://dx.doi.org/10.1021/acsaami.1c14317</a>         |
| 1145. | PE25   | CI-BTA3 | 10.750 | 13.560 | 0.722 | 1.080 | <a href="http://dx.doi.org/10.1021/acsaami.1c14317">http://dx.doi.org/10.1021/acsaami.1c14317</a>         |
| 1146. | PBDB-T | BDTIC   | 9.900  | 18.600 | 0.610 | 0.870 | <a href="http://dx.doi.org/10.1007/s10118-020-2440-8">http://dx.doi.org/10.1007/s10118-020-2440-8</a>     |
| 1147. | PBDB-T | ITIC    | 10.220 | 16.800 | 0.708 | 0.861 | <a href="http://dx.doi.org/10.1021/acsaami.0c02862">http://dx.doi.org/10.1021/acsaami.0c02862</a>         |
| 1148. | PBDB-T | BTP-N   | 11.970 | 24.870 | 0.644 | 0.748 | <a href="http://dx.doi.org/10.1016/j.cej.2021.132830">http://dx.doi.org/10.1016/j.cej.2021.132830</a>     |
| 1149. | PBDB-T | BTP-S   | 12.560 | 26.500 | 0.667 | 0.711 | <a href="http://dx.doi.org/10.1016/j.cej.2021.132830">http://dx.doi.org/10.1016/j.cej.2021.132830</a>     |
| 1150. | PBDB-T | BTP-Se  | 14.200 | 28.660 | 0.697 | 0.711 | <a href="http://dx.doi.org/10.1016/j.cej.2021.132830">http://dx.doi.org/10.1016/j.cej.2021.132830</a>     |
| 1151. | PM6    | TTCO-4F | 10.590 | 19.310 | 0.676 | 0.817 | <a href="http://dx.doi.org/10.1007/s11426-020-9820-2">http://dx.doi.org/10.1007/s11426-020-9820-2</a>     |
| 1152. | PM6    | TTC2-4F | 11.430 | 20.000 | 0.680 | 0.838 | <a href="http://dx.doi.org/10.1007/s11426-020-9820-2">http://dx.doi.org/10.1007/s11426-020-9820-2</a>     |



|       |         |             |        |        |       |       |                                                                                                       |
|-------|---------|-------------|--------|--------|-------|-------|-------------------------------------------------------------------------------------------------------|
| 1153. | PM6     | TTC4-4F     | 12.680 | 20.960 | 0.679 | 0.884 | <a href="http://dx.doi.org/10.1007/s11426-020-9820-2">http://dx.doi.org/10.1007/s11426-020-9820-2</a> |
| 1154. | PM6     | TTC6-4F     | 13.240 | 21.650 | 0.684 | 0.890 | <a href="http://dx.doi.org/10.1007/s11426-020-9820-2">http://dx.doi.org/10.1007/s11426-020-9820-2</a> |
| 1155. | PM6     | TTC8-4F     | 13.950 | 22.140 | 0.694 | 0.895 | <a href="http://dx.doi.org/10.1007/s11426-020-9820-2">http://dx.doi.org/10.1007/s11426-020-9820-2</a> |
| 1156. | PM6     | TTC10-4F    | 13.200 | 22.160 | 0.655 | 0.899 | <a href="http://dx.doi.org/10.1007/s11426-020-9820-2">http://dx.doi.org/10.1007/s11426-020-9820-2</a> |
| 1157. | PM6     | TTC12-4F    | 12.530 | 21.910 | 0.627 | 0.903 | <a href="http://dx.doi.org/10.1007/s11426-020-9820-2">http://dx.doi.org/10.1007/s11426-020-9820-2</a> |
| 1158. | PBDB-TF | BTIC-4Br    | 7.510  | 20.330 | 0.412 | 0.870 | <a href="http://dx.doi.org/10.1002/advs.201903784">http://dx.doi.org/10.1002/advs.201903784</a>       |
| 1159. | PBDB-TF | BTIC-BO-4Br | 14.030 | 23.810 | 0.655 | 0.860 | <a href="http://dx.doi.org/10.1002/advs.201903784">http://dx.doi.org/10.1002/advs.201903784</a>       |
| 1160. | PBDB-TF | BTIC-2Br-m  | 16.110 | 23.770 | 0.713 | 0.880 | <a href="http://dx.doi.org/10.1002/advs.201903784">http://dx.doi.org/10.1002/advs.201903784</a>       |
| 1161. | PM6     | 2T2Se-F     | 12.170 | 20.630 | 0.669 | 0.875 | <a href="http://dx.doi.org/10.1016/j.cej.2021.132298">http://dx.doi.org/10.1016/j.cej.2021.132298</a> |
| 1162. | PTB7-Th | IOTIC-4F    | 10.200 | 20.500 | 0.680 | 0.720 | <a href="http://dx.doi.org/10.1002/aenm.202001203">http://dx.doi.org/10.1002/aenm.202001203</a>       |
| 1163. | PTB7-Th | IOTIC-2F    | 7.200  | 14.800 | 0.600 | 0.790 | <a href="http://dx.doi.org/10.1002/aenm.202001203">http://dx.doi.org/10.1002/aenm.202001203</a>       |

|       |         |          |        |        |       |       |                                                                                                               |
|-------|---------|----------|--------|--------|-------|-------|---------------------------------------------------------------------------------------------------------------|
| 1164. | PTB7-Th | IOTIC    | 6.000  | 10.700 | 0.600 | 0.880 | <a href="http://dx.doi.org/10.1002/aenm.202001203">http://dx.doi.org/10.1002/aenm.202001203</a>               |
| 1165. | PM6     | BZ4F-5   | 12.860 | 21.120 | 0.694 | 0.840 | <a href="http://dx.doi.org/10.1002/adfm.202101627">http://dx.doi.org/10.1002/adfm.202101627</a>               |
| 1166. | PM6     | BZ4F-6   | 15.140 | 23.230 | 0.748 | 0.860 | <a href="http://dx.doi.org/10.1002/adfm.202101627">http://dx.doi.org/10.1002/adfm.202101627</a>               |
| 1167. | PM6     | BZ4F-7   | 16.170 | 25.060 | 0.762 | 0.840 | <a href="http://dx.doi.org/10.1002/adfm.202101627">http://dx.doi.org/10.1002/adfm.202101627</a>               |
| 1168. | B1      | BO-4Cl   | 15.300 | 24.810 | 0.730 | 0.820 | <a href="http://dx.doi.org/10.1007/s40843-020-1269-9">http://dx.doi.org/10.1007/s40843-020-1269-9</a>         |
| 1169. | BTR     | BO-4Cl   | 10.400 | 17.910 | 0.660 | 0.830 | <a href="http://dx.doi.org/10.1007/s40843-020-1269-9">http://dx.doi.org/10.1007/s40843-020-1269-9</a>         |
| 1170. | PBDB-T  | DFB-dIDT | 6.710  | 15.570 | 0.486 | 0.860 | <a href="http://dx.doi.org/10.1016/j.solener.2020.01.032">http://dx.doi.org/10.1016/j.solener.2020.01.032</a> |
| 1171. | PBDB-T  | BT-dIDT  | 10.520 | 18.590 | 0.646 | 0.870 | <a href="http://dx.doi.org/10.1016/j.solener.2020.01.032">http://dx.doi.org/10.1016/j.solener.2020.01.032</a> |
| 1172. | TTC-F   | BTA5     | 9.810  | 12.210 | 0.650 | 1.220 | <a href="http://dx.doi.org/10.1021/acsaami.2c07251">http://dx.doi.org/10.1021/acsaami.2c07251</a>             |
| 1173. | TTC-F   | F-BTA5   | 10.570 | 13.930 | 0.670 | 1.130 | <a href="http://dx.doi.org/10.1021/acsaami.2c07251">http://dx.doi.org/10.1021/acsaami.2c07251</a>             |
| 1174. | TTC-Cl  | BTA5     | 8.650  | 10.660 | 0.640 | 1.250 | <a href="http://dx.doi.org/10.1021/acsaami.2c07251">http://dx.doi.org/10.1021/acsaami.2c07251</a>             |

|       |        |             |        |        |       |       |                                                                                                   |
|-------|--------|-------------|--------|--------|-------|-------|---------------------------------------------------------------------------------------------------|
| 1175. | TTC-Cl | F-BTA5      | 10.980 | 13.380 | 0.700 | 1.170 | <a href="http://dx.doi.org/10.1021/acscami.2c07251">http://dx.doi.org/10.1021/acscami.2c07251</a> |
| 1176. | PM6    | BTP         | 8.800  | 16.200 | 0.560 | 0.950 | <a href="http://dx.doi.org/10.1021/acscami.0c16389">http://dx.doi.org/10.1021/acscami.0c16389</a> |
| 1177. | PM6    | BTP-4Cl     | 14.500 | 24.900 | 0.674 | 0.840 | <a href="http://dx.doi.org/10.1021/acscami.0c16389">http://dx.doi.org/10.1021/acscami.0c16389</a> |
| 1178. | J52    | i-IEICO-2Cl | 11.450 | 19.500 | 0.667 | 0.884 | <a href="http://dx.doi.org/10.1021/acscem.1c02608">http://dx.doi.org/10.1021/acscem.1c02608</a>   |
| 1179. | J52    | i-IECO-4Cl  | 12.160 | 21.220 | 0.688 | 0.850 | <a href="http://dx.doi.org/10.1021/acscem.1c02608">http://dx.doi.org/10.1021/acscem.1c02608</a>   |
| 1180. | PM6    | F8IDT-Br    | 9.700  | 14.600 | 0.678 | 0.980 | <a href="http://dx.doi.org/10.1021/acscem.1c00369">http://dx.doi.org/10.1021/acscem.1c00369</a>   |
| 1181. | PM6    | C8IDT-Br    | 9.850  | 15.660 | 0.648 | 0.970 | <a href="http://dx.doi.org/10.1021/acscem.1c00369">http://dx.doi.org/10.1021/acscem.1c00369</a>   |
| 1182. | BTR    | Y6          | 11.880 | 22.600 | 0.628 | 0.837 | <a href="http://dx.doi.org/10.1021/acscem.1c00617">http://dx.doi.org/10.1021/acscem.1c00617</a>   |
| 1183. | PSTz1  | Y6          | 12.100 | 20.700 | 0.690 | 0.840 | <a href="http://dx.doi.org/10.1021/acscami.1c17199">http://dx.doi.org/10.1021/acscami.1c17199</a> |
| 1184. | POTz1  | Y6          | 12.000 | 21.000 | 0.680 | 0.840 | <a href="http://dx.doi.org/10.1021/acscami.1c17199">http://dx.doi.org/10.1021/acscami.1c17199</a> |
| 1185. | PNBTz1 | Y6          | 14.000 | 23.800 | 0.700 | 0.840 | <a href="http://dx.doi.org/10.1021/acscami.1c17199">http://dx.doi.org/10.1021/acscami.1c17199</a> |

|       |         |                            |        |        |       |       |                                                                                                   |
|-------|---------|----------------------------|--------|--------|-------|-------|---------------------------------------------------------------------------------------------------|
| 1186. | PBDBT   | CNDTBT-<br>C8IDT-<br>INCN  | 11.220 | 18.930 | 0.666 | 0.863 | <a href="http://dx.doi.org/10.1021/acscami.0c13277">http://dx.doi.org/10.1021/acscami.0c13277</a> |
| 1187. | PBDBT   | CNDTBT-<br>C8IDT-<br>FINCN | 12.330 | 21.810 | 0.700 | 0.793 | <a href="http://dx.doi.org/10.1021/acscami.0c13277">http://dx.doi.org/10.1021/acscami.0c13277</a> |
| 1188. | PBDB-T  | BCDT-4F                    | 9.650  | 18.330 | 0.650 | 0.800 | <a href="http://dx.doi.org/10.1021/acscami.0c00837">http://dx.doi.org/10.1021/acscami.0c00837</a> |
| 1189. | PBDB-T  | BCDT-4Cl                   | 12.100 | 23.340 | 0.650 | 0.770 | <a href="http://dx.doi.org/10.1021/acscami.0c00837">http://dx.doi.org/10.1021/acscami.0c00837</a> |
| 1190. | PBDB-TF | IT-4F                      | 13.700 | 20.200 | 0.789 | 0.858 | <a href="http://dx.doi.org/10.1021/acscami.0c05172">http://dx.doi.org/10.1021/acscami.0c05172</a> |
| 1191. | PBDB-TF | BTP-4Cl                    | 16.500 | 25.500 | 0.760 | 0.850 | <a href="http://dx.doi.org/10.1021/acscami.0c05172">http://dx.doi.org/10.1021/acscami.0c05172</a> |
| 1192. | PE31    | BTA5                       | 10.080 | 13.620 | 0.656 | 1.100 | <a href="http://dx.doi.org/10.1021/acscami.1c03757">http://dx.doi.org/10.1021/acscami.1c03757</a> |
| 1193. | PE32    | BTA5                       | 7.400  | 11.550 | 0.570 | 1.080 | <a href="http://dx.doi.org/10.1021/acscami.1c03757">http://dx.doi.org/10.1021/acscami.1c03757</a> |
| 1194. | PE33    | BTA5                       | 8.990  | 12.590 | 0.603 | 1.140 | <a href="http://dx.doi.org/10.1021/acscami.1c03757">http://dx.doi.org/10.1021/acscami.1c03757</a> |
| 1195. | J52-Cl  | BTA5                       | 8.640  | 11.290 | 0.619 | 1.200 | <a href="http://dx.doi.org/10.1021/acscami.1c03757">http://dx.doi.org/10.1021/acscami.1c03757</a> |
| 1196. | PM6     | BDTBO-4F                   | 14.830 | 22.950 | 0.728 | 0.860 | <a href="http://dx.doi.org/10.1021/acscami.0c19033">http://dx.doi.org/10.1021/acscami.0c19033</a> |

|       |      |           |        |        |       |       |                                                                                                   |
|-------|------|-----------|--------|--------|-------|-------|---------------------------------------------------------------------------------------------------|
| 1197. | PM6  | BDTBO-4Cl | 13.870 | 22.800 | 0.705 | 0.830 | <a href="http://dx.doi.org/10.1021/acscami.0c19033">http://dx.doi.org/10.1021/acscami.0c19033</a> |
| 1198. | P3HT | TTDTC-0F  | 4.780  | 9.900  | 0.638 | 0.690 | <a href="http://dx.doi.org/10.1021/acscami.1c21089">http://dx.doi.org/10.1021/acscami.1c21089</a> |
| 1199. | P3HT | TTDTC-2F  | 6.610  | 15.800 | 0.613 | 0.600 | <a href="http://dx.doi.org/10.1021/acscami.1c21089">http://dx.doi.org/10.1021/acscami.1c21089</a> |
| 1200. | P3HT | TTDTC-4F  | 7.620  | 22.100 | 0.601 | 0.560 | <a href="http://dx.doi.org/10.1021/acscami.1c21089">http://dx.doi.org/10.1021/acscami.1c21089</a> |
| 1201. | PM6  | L8-BO     | 18.500 | 26.320 | 0.803 | 0.877 | 10.1039/d2e00595f                                                                                 |
| 1202. | PM6  | BTP-H2    | 18.500 | 25.330 | 0.785 | 0.932 | 10.1039/d2e00595f                                                                                 |
| 1203. | D18  | L8-BO     | 19.050 | 26.860 | 0.772 | 0.918 | 10.1002/adma.202204718                                                                            |
| 1204. | D18  | S9TBO-F   | 17.170 | 28.190 | 0.749 | 0.838 | 10.1002/adma.202202089                                                                            |
| 1205. | D18  | BS3TSe-4F | 18.480 | 29.400 | 0.759 | 0.828 | 10.1002/adma.202202089                                                                            |
| 1206. | PM6  | Y-BO-FCI  | 17.520 | 23.450 | 0.779 | 0.850 | 10.1039/d1e01832a                                                                                 |
| 1207. | PM6  | Y-Bo-FBr  | 16.470 | 25.830 | 0.750 | 0.850 | 10.1039/d1e01832a                                                                                 |
| 1208. | PM6  | Y-BO-CIBr | 13.610 | 22.090 | 0.716 | 0.860 | 10.1039/d1e01832a                                                                                 |
| 1209. | PM6  | PY-V-y    | 17.100 | 24.800 | 0.758 | 0.912 | 10.1002/adma.202200361                                                                            |
| 1210. | PM6  | PY-T-y    | 16.100 | 24.100 | 0.719 | 0.929 | 10.1002/adma.202200361                                                                            |
| 1211. | PM6  | PY-2T-y   | 15.300 | 23.500 | 0.699 | 0.933 | 10.1002/adma.202200361                                                                            |

|       |          |                  |        |        |       |       |                                      |
|-------|----------|------------------|--------|--------|-------|-------|--------------------------------------|
| 1212. | PBDTT    | Y18-1F           | 8.840  | 22.420 | 0.518 | 0.760 | 10.1002/a<br>dma.2021<br>05483       |
| 1213. | PBDTT1Cl | Y18-1F           | 17.100 | 27.700 | 0.713 | 0.870 | 10.1002/a<br>dma.2021<br>05483       |
| 1214. | PBDTT2Cl | Y18-1F           | 11.740 | 21.890 | 0.586 | 0.900 | 10.1002/a<br>dma.2021<br>05483       |
| 1215. | PM6      | BTP-T-2Cl        | 14.890 | 22.320 | 0.715 | 0.936 | 10.1002/adf<br>m.20210861<br>4       |
| 1216. | PM6      | BTP-T-3Cl        | 17.610 | 26.020 | 0.757 | 0.893 | 10.1002/adf<br>m.20210861<br>4       |
| 1217. | PM6      | BTP-T-<br>4Cl-BO | 17.200 | 26.740 | 0.761 | 0.844 | 10.1002/adf<br>m.20210861<br>4       |
| 1218. | PM6      | BTTPC-Br         | 14.460 | 22.160 | 0.695 | 0.937 | 10.1002/adf<br>m.20210861<br>4       |
| 1219. | PBDB-T   | BTP-T-2Cl        | 15.370 | 25.630 | 0.693 | 0.863 | 10.1002/adf<br>m.20210861<br>4       |
| 1220. | PBDB-T   | BTP-T-3Cl        | 14.690 | 25.220 | 0.733 | 0.794 | 10.1002/adf<br>m.20210861<br>4       |
| 1221. | PBDB-T   | BTTPC-Br         | 15.220 | 24.710 | 0.710 | 0.860 | 10.1002/adf<br>m.20210861<br>4       |
| 1222. | P4T2F-HD | Y6               | 2.900  | 9.640  | 0.382 | 0.780 | 10.1002/adf<br>m.20220114<br>2       |
| 1223. | P4T2F-HD | Y6-BO            | 13.600 | 21.210 | 0.745 | 0.750 | 10.1002/adf<br>m.20220114<br>2       |
| 1224. | P5TCN-2F | Y6               | 16.100 | 25.070 | 0.750 | 0.850 | 10.1002/adf<br>m.20220114<br>2       |
| 1225. | P5TCN-2F | Y6-BO            | 15.800 | 24.020 | 0.754 | 0.870 | 10.1002/adf<br>m.20220114<br>2       |
| 1226. | D18      | L8-BO            | 16.700 | 24.550 | 0.758 | 0.900 | 10.1016/j.na<br>noen.2022.1<br>07538 |
| 1227. | PM6      | CH4              | 16.490 | 26.110 | 0.711 | 0.888 | 10.1002/ani<br>e.20220958<br>0       |
| 1228. | PM6      | CH6              | 18.330 | 26.620 | 0.784 | 0.875 | 10.1002/ani<br>e.20220958<br>0       |
| 1229. | L2       | N3               | 16.690 | 24.990 | 0.768 | 0.870 | 10.1039/d1t<br>a10233h               |

|       |      |          |        |        |            |       |                                       |
|-------|------|----------|--------|--------|------------|-------|---------------------------------------|
| 1230. | L3   | N3       | 17.230 | 26.390 | 0.759      | 0.860 | 10.1039/d1t<br>a10233h                |
| 1231. | PBQ6 | m-THE    | 18.510 | 26.610 | 0.790      | 0.880 | 10.1039/d2e<br>e00430e                |
| 1232. | PBQ6 | o-THE    | 16.220 | 26.100 | 0.704      | 0.882 | 10.1039/d2e<br>e00430e                |
| 1233. | PM6  | YCF3     | 18.210 | 27.560 | 76.80<br>0 | 0.861 | 10.1021/acs<br>energylett.2<br>c02140 |
| 1234. | PM6  | YCH3     | 15.530 | 25.450 | 0.700      | 0.872 | 10.1021/acs<br>energylett.2<br>c02140 |
| 1235. | D18  | BTPIC-4F | 10.300 | 21.790 | 0.605      | 0.780 | 10.1002/ad<br>ma.2022073<br>36        |
| 1236. | D18  | TTPIC-4F | 17.100 | 25.240 | 0.766      | 0.883 | 10.1002/ad<br>ma.2022073<br>36        |
| 1237. | PM6  | Y6-IOBO  | 18.020 | 25.130 | 0.771      | 0.930 | 10.1021/acs.<br>chemmater.<br>2c02851 |
| 1238. | PM6  | Y6-IO    | 16.810 | 25.510 | 0.735      | 0.900 | 10.1021/acs.<br>chemmater.<br>2c02851 |
| 1239. | PM6  | QX       | 14.900 | 24.150 | 0.744      | 0.829 | 10.1021/acs<br>energylett.2<br>c01589 |
| 1240. | PM6  | QX-EH    | 12.220 | 20.080 | 0.664      | 0.917 | 10.1021/acs<br>energylett.2<br>c01589 |
| 1241. | PM6  | QX-TH    | 11.280 | 18.830 | 0.631      | 0.949 | 10.1021/acs<br>energylett.2<br>c01589 |
| 1242. | PM6  | QX-THF   | 17.450 | 24.490 | 0.789      | 0.902 | 10.1021/acs<br>energylett.2<br>c01589 |

**Table S4** Brief description and categories of critical molecular descriptors

| Sr. No. | Descriptors  | Description                                                                           | Categories                  |
|---------|--------------|---------------------------------------------------------------------------------------|-----------------------------|
| 1.      | SMR-VSA 1-10 | These descriptors utilize the MR contribution as well as area of surface contribution | 2D matrix-based descriptors |

|     |                          |                                                                                                                                   |                              |
|-----|--------------------------|-----------------------------------------------------------------------------------------------------------------------------------|------------------------------|
| 2.  | PEOE-VSA 1-14            | The descriptors which used surface area of contribution and partial charges                                                       | P_VSA-like descriptors       |
| 3.  | MaxEstateIndex           | Describe the maximum Estate index                                                                                                 | Estate index descriptor      |
| 4.  | SlogP-VSA 1-12           | These descriptors use the contribution slog-P as well as surface area contribution                                                | 2D matrix-based descriptors  |
| 5.  | Estate-VSA 1-11          | These utilize the indices Estate and contribution of surface-area                                                                 | Hybrid Estate-VSA descriptor |
| 6.  | PEOE-VSA 1-14            | These are the MOE-type descriptors. The partial charge or surface area contributions used for calculation                         | P_VSA-like descriptors       |
| 7.  | NumHAcceptor             | Calculate the number of acceptor atoms in the H-bonds compound (N, O, and F)                                                      | Functional-group count       |
| 8.  | fr-C-O                   | These descriptors determine the quantity of carbonyl O in the compound                                                            | Atom-centered fragment       |
| 9.  | MinAbsEstateindex        | Minimum absolute Estate index                                                                                                     | Estate index descriptors     |
| 10. | NumAliphaticHeterocycles | These are the descriptor which measure the number of aliphatic containing minimum one nonaromatic bond hydro-cycle for a molecule | Functional group count       |
| 11. | NumAliphaticRings        | These descriptors calculate the number of aliphatic rings for molecules                                                           | Functional group count       |
| 12. | MinEStateIndex           | Describe Minimum Estate index                                                                                                     | State index descriptor       |
